# Supplementary material for: Heterogeneous iron catalyst for C(1)–H functionalization of 2-naphthols with primary aromatic alcohols
Source: Royal Society of Chemistry journal article supplement (doi:10.1039/d3ob00004d), 2023-01-01
Supplement: d3ob00004d1.pdf [file d3ob00004d1.pdf]

## Electronic Supplementary Information

### Heterogeneous Iron Catalyst for C(1)-H Functionalization of 2-Naphthols with Primary Aromatic Alcohols

Subir Biswas,<sup>a</sup> Dipankar Barman,<sup>b</sup> Gautam Gogoi,<sup>a</sup> Nazimul Hoque,<sup>a</sup> Arpita Devi,<sup>a</sup> Siddhartha K. Purkayastha,<sup>c</sup> Ankur Kanti Guha,<sup>c</sup> Jayanta K. Nath<sup>d</sup>, Kusum K. Bania\*<sup>a</sup>

<sup>a</sup>Department of Chemical Sciences, Tezpur University, Assam 784028, India.

<sup>b</sup>Department of Chemistry, Indian Institute of Technology Guwahati, Assam 781039, India.

<sup>c</sup>Cotton University, Panbazar, Guwahati, Assam 781001, India.

<sup>d</sup>Department of Chemistry, S.B. Deorah College, Ulubari, Guwahati, Assam, 781007

Corresponding Authors \*E-mail: [kusum@tezu.ernet.in](mailto:kusum@tezu.ernet.in)

ORCID: 0000-0001-6535-3913

| Table of Contents |                                                                                                                                    |         |
|-------------------|------------------------------------------------------------------------------------------------------------------------------------|---------|
| SL. No            | Title                                                                                                                              | Page No |
| 1                 | Physical Measurements                                                                                                              | S3-S4   |
| 2                 | Synthesis of iron oxide supported on potassium exchanged zeolite-Y (Fe <sub>2</sub> O <sub>3</sub> -KY)                            | S5      |
| 3                 | Characterization of Fe <sub>2</sub> O <sub>3</sub> -KY                                                                             | S5      |
|                   | 3.1 XRD analysis, <b>Fig. S1</b>                                                                                                   | S5-S6   |
|                   | 3.2 XPS analysis, <b>Fig. S2</b>                                                                                                   | S6-S7   |
|                   | 3.3 EDX analysis of Fe <sub>2</sub> O <sub>3</sub> -KY, <b>Fig. S3</b>                                                             | S8      |
|                   | 3.4 SEM images of Fe <sub>2</sub> O <sub>3</sub> -KY, <b>Fig. S4</b>                                                               | S9      |
|                   | 3.5 TEM images of Fe <sub>2</sub> O <sub>3</sub> -KY, <b>Fig. S5</b>                                                               | S10     |
|                   | 3.6 DRS Spectra of Fe <sub>2</sub> O <sub>3</sub> -KY, <b>Fig. S6</b>                                                              | S11     |
| 4                 | X-ray crystallography                                                                                                              | S12-S13 |
|                   | Crystallographic data and refinement parameters for the compound <b>3h</b> , <b>3v</b> , <b>3b</b> and <b>3z</b> , <b>Table S1</b> | S13     |
| 5                 | General procedure for benzylation of 2-naphthols.                                                                                  | S14     |
| 6                 | Characterization of the Compounds                                                                                                  | S15-S46 |
|                   | ❖ NMR Analysis ( <b>3a-3z</b> )                                                                                                    | S15-S20 |
|                   | ❖ NMR Spectra of compounds                                                                                                         | S21-S46 |

## Electronic Supplementary Information

|    |                                                                                                                               |         |
|----|-------------------------------------------------------------------------------------------------------------------------------|---------|
| 7  | Table S2: Comparison of catalytic activities of different catalysts for C(1) benzylation of 2-naphthols with primary alcohols | S47     |
| 8  | Density functional theory (DFT) Calculation, <b>Fig. S7, Fig. S8</b>                                                          | S48-S57 |
| 9  | Catalytic Recyclability Study, <b>Fig. S9, Fig. S10</b>                                                                       | S58-59  |
| 10 | References                                                                                                                    | S-60    |

## Electronic Supplementary Information

### 1. Physical measurements

All the characterizations and analysis were done by using the following analytical approaches to complete physical measurements. X-ray diffraction (XRD) of the sample was carried out in a Philips PANalytical Empyrean instrument, enabling low-angle measurement from 0-60° with a minimum step size ( $2\theta$ ) of 0.0001, and BRUKER AXS, D8 FOCUS instrument in the  $2\theta$  value range of 5-80°. The X-ray photoelectron spectroscopy (XPS) analyses were measured with KRATOS (ESCA AXIS 165) spectrometer using Mg K $\alpha$  (1253.6 eV) radiation as a source. The oven-dried samples (finely ground) were dusted on a graphite sheet (double stick) and mounted over the regular sample holder, before being transferred to an analysis chamber. The material was degassed overnight in a vacuum oven before recording the XPS. The binding energy values were corrected with reference to C 1s peak at 284.8 eV. The peaks were deconvoluted using Origin software (OriginPro 8.5). Energy dispersive X-ray (EDX) analysis were performed with JEOL, model No: 7582 (Oxford make), resolution: 137 eV at 5.9 KeV; Minimum weight % = .01%, sample size: 10mm dia, 1mm thick(max), dry and moisture free and Scanning electron microscopic (SEM) images were recorded with JEOL, JAPAN (Model: JSM 6390LV) with resolution: 3nm, magnification: 3,00,000X, applied voltage: 30 kV (max.). The transmission electron microscopic (TEM) images were recorded on a JEOL (JEM-2010) instrument equipped with a CCD camera (slow-scan) with a 200 kV accelerating voltage. A UV-visible diffuse reflectance spectrum (UV-DRS) analysis was performed in a DR apparatus equipped with an assimilating sphere having 60 mm inner diameter, (Hitachi U-3400 spectrophotometer). Thin Layer Chromatographic (TLC) plate (TLC Silica gel 60 F<sub>254</sub>) was used for monitoring the progress of the reaction. The reactions were monitored through TLC by comparing the retention factor (R<sub>f</sub>) of the reactant molecule with the reaction mixture. The isolated % yields are calculated after isolation of desired product using

## Electronic Supplementary Information

the following equation: % yield = [mole of isolated product/mole of limiting reactant]  $\times$  100.  $^1\text{H}$  NMR spectra are recorded on 400, 500 and 600 MHz spectrometers.  $^{13}\text{C}$  NMR spectra were recorded on 101, 126 and 151 MHz.  $^1\text{H}$ , and  $^{13}\text{C}$  nuclear magnetic resonance (NMR) analyses were done by DRX-400 Varian, Bruker AVANCE III HD 600 MHz, 500 MHz and 400 MHz spectrometers. Chemical shifts ( $\delta$ ) are reported in ppm downfield from tetramethylsilane; spin-spin coupling constants (J) are expressed in hertz (Hz), and other data are reported as follows: s (singlet), d (doublet), t (triplet), m (multiplet) q (quartet), br s (broad singlet), dd (doublet of doublet). Mass spectra (MS) were recorded in Thermo Scientific Q-Exactive, Accela 1250 pump. Perkin Elmer 20 CHN analyser was used for elemental analysis (wt% C, H) in the synthesized compounds.

## Electronic Supplementary Information

### 2. Synthesis of iron oxide supported on potassium exchanged zeolite-Y ( $\text{Fe}_2\text{O}_3\text{-KY}$ )

For synthesis of iron oxide supported on potassium exchanged zeolite-Y ( $\text{Fe}_2\text{O}_3\text{-KY}$ ), 2 g of zeolite-HY (procured from Sigma-Aldrich.) was mixed in a round bottom flask in an aqueous solution and then 50 mL of 0.1 M potassium chloride (KCl) (purchased from SRL chemicals) was added to it. The suspension was stirred for 48 hours under refluxing condition at 60 °C. To the potassium exchanged zeolite-Y (KY), 50 mL of 0.1 M of sodium hydroxide (NaOH) solution and 0.01 M (0.135 g in 50 mL water) of iron (III) chloride (bought from Sigma-Aldrich) solution was added dropwise. It was then stirred for another 24 hours under refluxing condition at 60 °C. The resultant light yellowish solid material was collected by simple filtration method using Whatman 41 filter paper and washed several times with warm water. The light yellowish solid was washed several times with water until it gave negative silver nitrate ( $\text{AgNO}_3$ ) (procured from Sigma Aldrich) test. The chloride free solid material was further calcination at 400 °C for 5 hours to get the zeolite-KY supported iron oxide nanocatalyst ( $\text{Fe}_2\text{O}_3\text{-KY}$ ). The material was vacuum dried prior to its characterization.

### 3. Characterization of $\text{Fe}_2\text{O}_3\text{-KY}$

#### 3.1 XRD analysis

In X-ray diffraction (XRD) pattern of  $\text{Fe}_2\text{O}_3\text{-KY}$  a significant difference was observed in the intensities of the (440) and (533) planes at  $2\theta$  values of  $18.7^\circ$  and  $20.4^\circ$  (Fig. S1, black line) in comparison to neat zeolite-Y (Fig. S1, red line).<sup>1</sup> Comparison of the XRD patterns also indicated for the presence of weak signals for  $\alpha$ -form of iron(III) oxide ( $\alpha\text{-Fe}_2\text{O}_3$ ) at  $2\theta$  value of  $33.2^\circ$  (104)  $35.6^\circ$  (110) without affecting the other signal of neat zeolite-Y. These results provided an evident for the formation of  $\alpha\text{-Fe}_2\text{O}_3$  nanoparticles on the surface of zeolite-Y, Fig. S1.<sup>2</sup>

## Electronic Supplementary Information

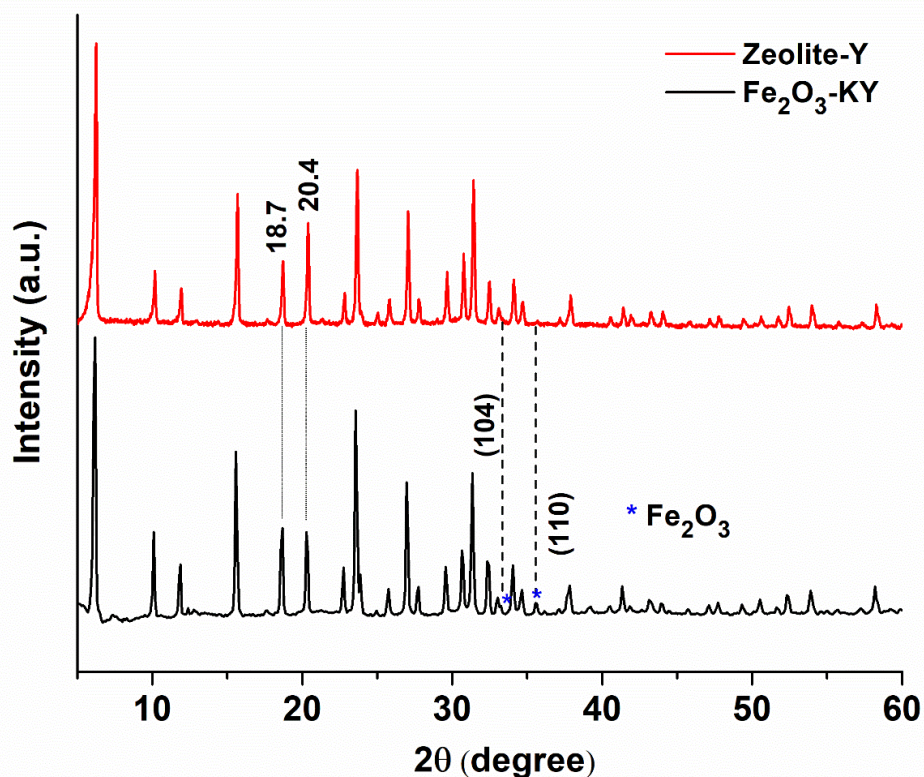

Fig. S1 a) XRD pattern of neat zeolite-Y (red), and Fe<sub>2</sub>O<sub>3</sub>-KY (black).

### 3.2 XPS analysis

All the elements viz Fe, Al, Si, and O present in the synthesised material, Fe<sub>2</sub>O<sub>3</sub>-KY was further confirmed from the XPS analysis, Fig. S2. The appearance of two prominent peaks at 711.2 eV and 724.9 eV corresponding to Fe 2p<sub>3/2</sub> and Fe 2p<sub>1/2</sub>, respectively clearly signified the presence of Fe (III) species in the synthesized Fe<sub>2</sub>O<sub>3</sub>-KY material (Fig. S2a).<sup>3</sup> A peak separation of more than 7 eV from Fe 2p<sub>3/2</sub> level and satellite peak (719.0 eV) further confirmed the presence of Fe (III) species in the material.<sup>3</sup> The binding energy values of 529.9, 530.9, and 531.8 eV in XPS spectrum of O 1s characteristic of Fe–O, Al–O, and Si–O bonds in the material, respectively (Fig. S2b).<sup>4</sup> The XPS spectra of Al 2p and Si 2p showed peaks for aluminosilicates at 74.4 eV and 103.0 eV, respectively (Fig S2b-c).<sup>5</sup> All of the above XPS peaks were fitted with respect to the C 1s peak having binding energy of 284.4 eV (C-C), 286.5 eV (C-O) and 289.0 eV (C=O), Fig. S2e.

## Electronic Supplementary Information

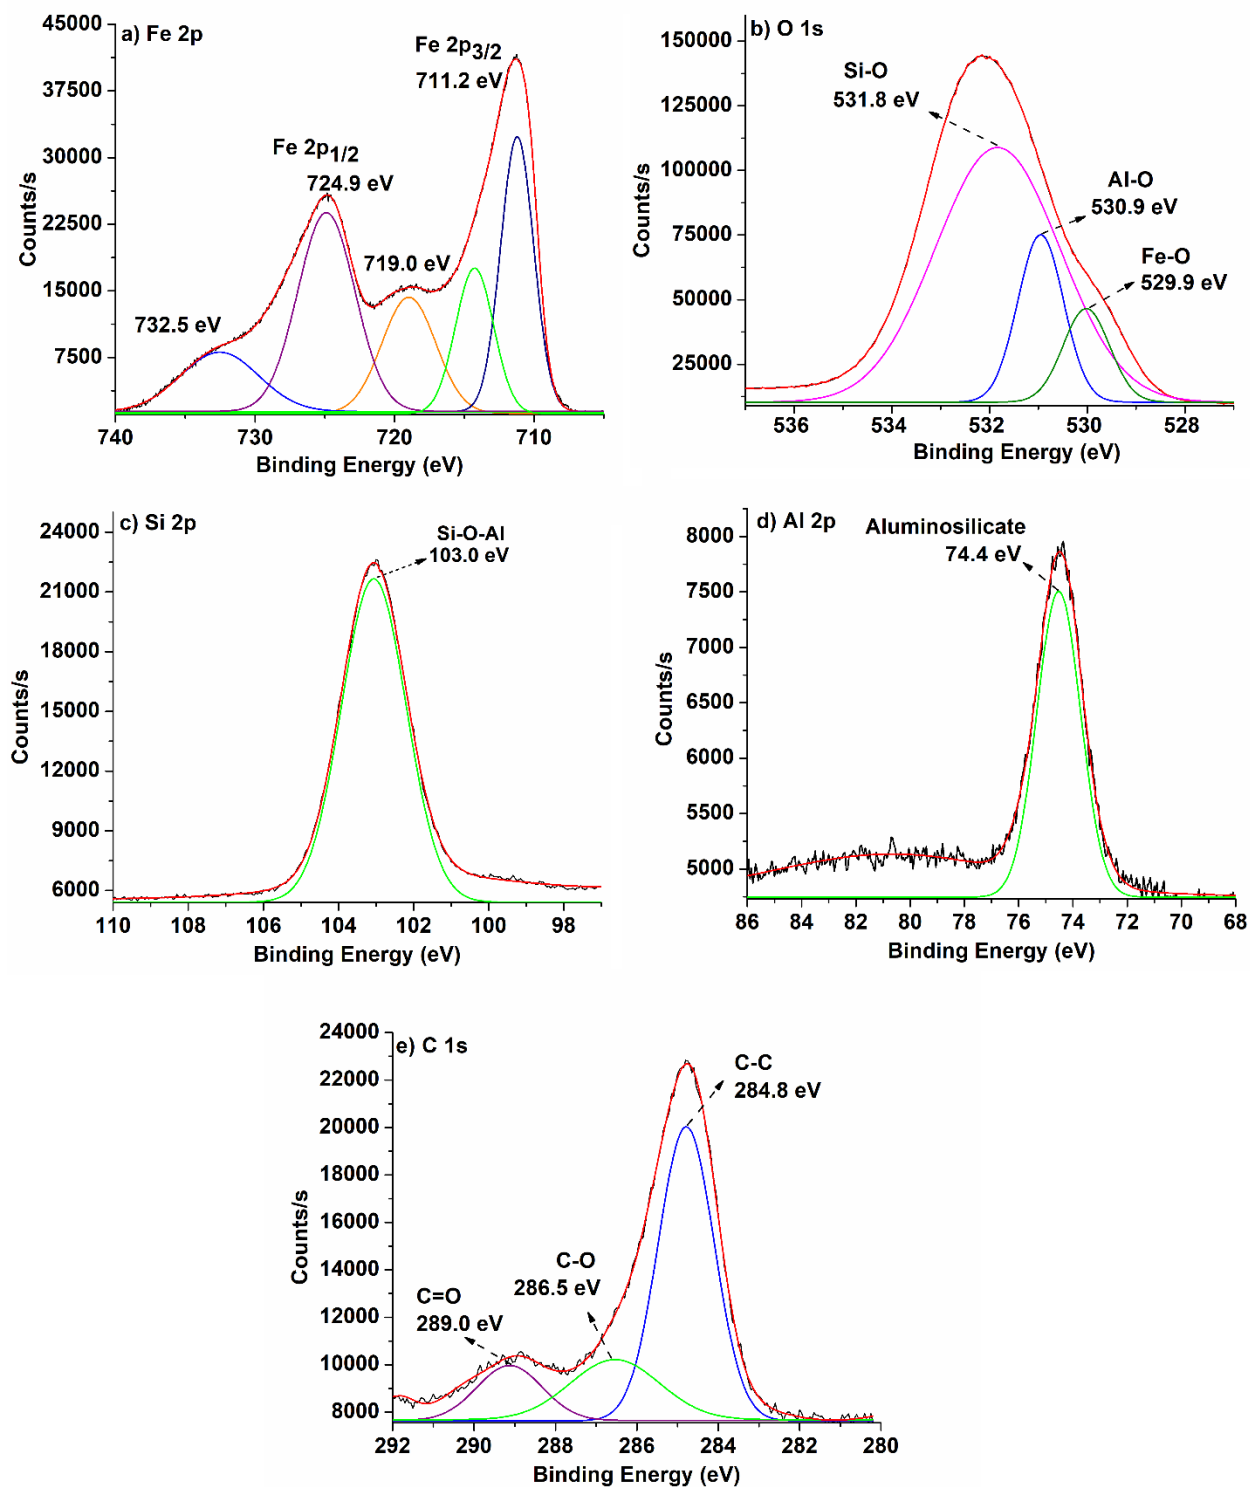

**Fig. S2** The XPS spectra of (a) Fe 2p, (b) O 1s, (c) Si 2p, (d) Al 2p and (e) C 1s in Fe<sub>2</sub>O<sub>3</sub>-KY catalyst.

## Electronic Supplementary Information

### 3.3 EDX spectra of Fe<sub>2</sub>O<sub>3</sub>-KY

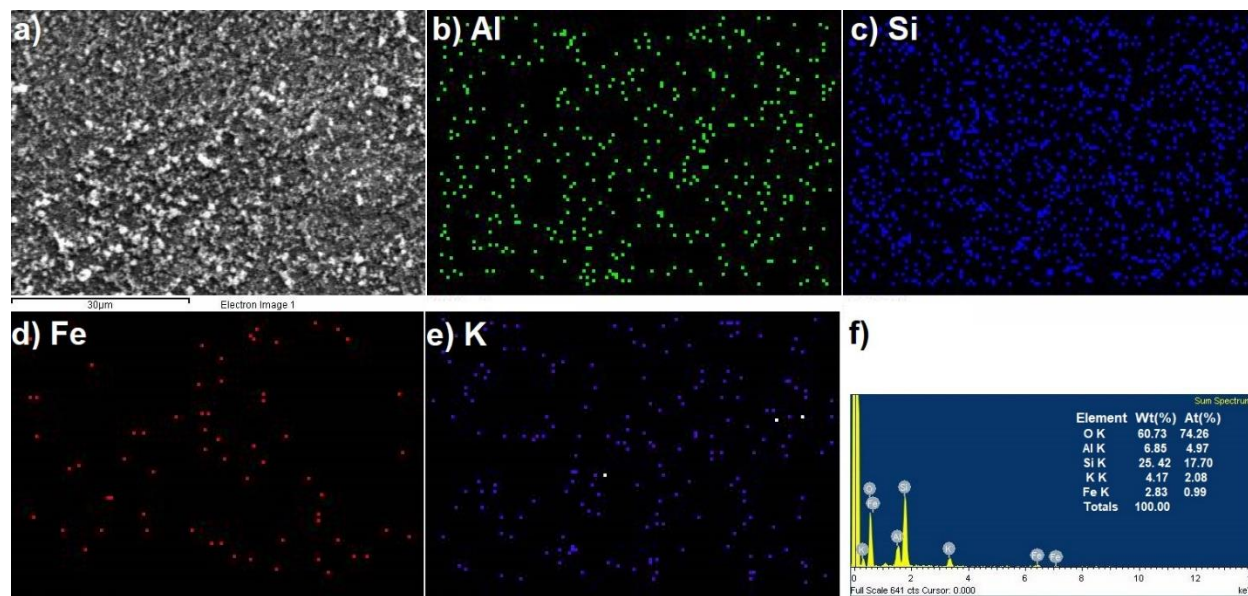

**Fig. S3** a) SEM image of Fe<sub>2</sub>O<sub>3</sub>-KY considered for EDS elemental mapping of (b) Al, (c) Si, (d) Fe, (e) K and (f) EDX spectra showing the presence of all the elements in Fe<sub>2</sub>O<sub>3</sub>-KY material. The elemental amounts are given in weight% (wt%) and atomic% (At%).



3.4 SEM images of Fe<sub>2</sub>O<sub>3</sub>-KY

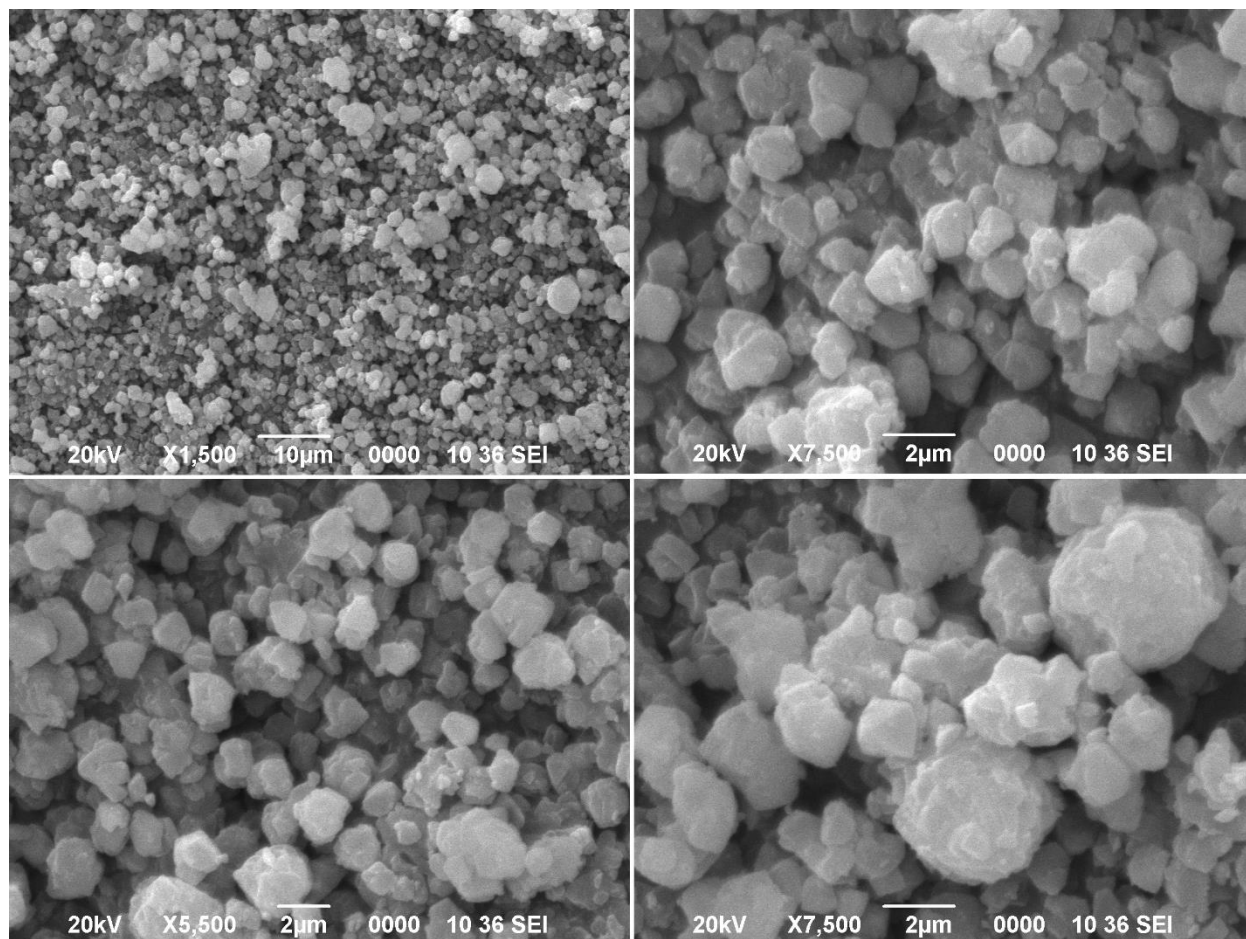

**Fig. S4** SEM images of Fe<sub>2</sub>O<sub>3</sub>-KY in different magnifications

3.5 TEM images of Fe<sub>2</sub>O<sub>3</sub>-KY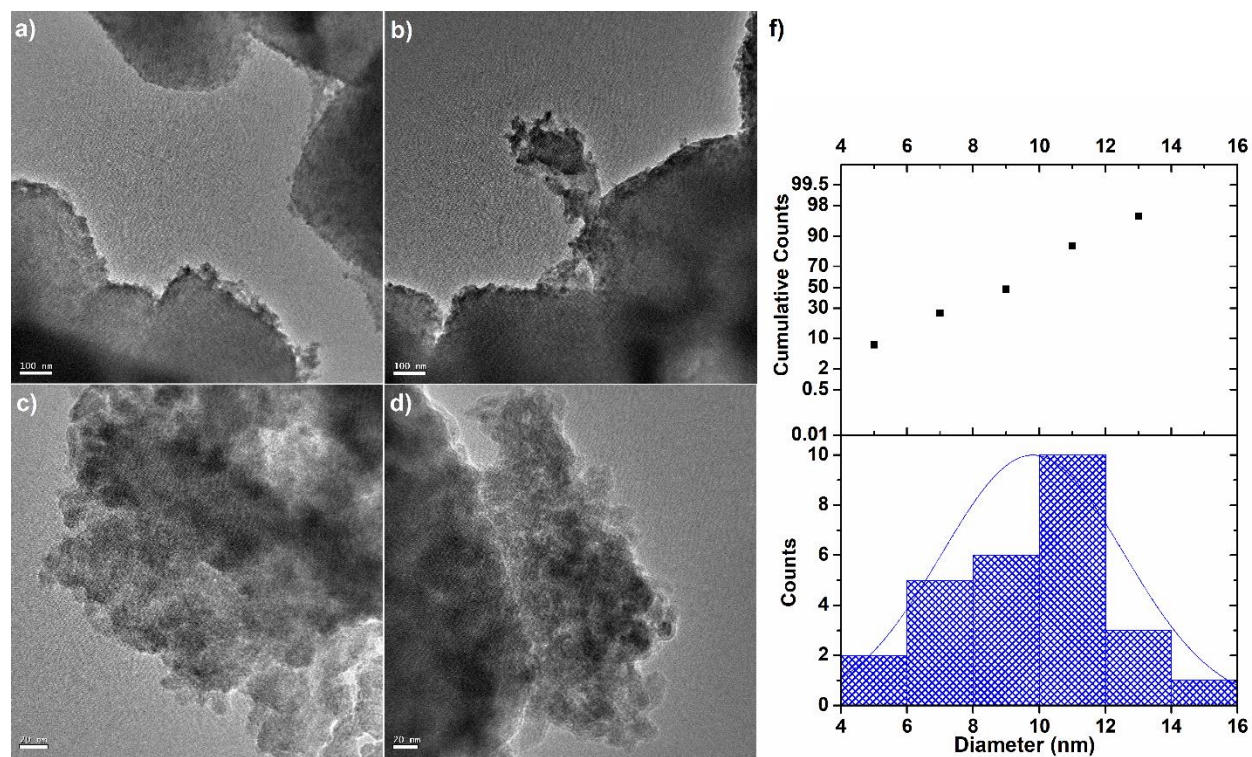

**Fig. S5** (a-b) TEM images of Fe<sub>2</sub>O<sub>3</sub>-KY showing the fine dispersion of Fe<sub>2</sub>O<sub>3</sub> NPs on potassium exchanged zeolite-Y, f) particle size distribution of Fe<sub>2</sub>O<sub>3</sub>-KY from TEM images.

3.6 DRS Spectra of Fe<sub>2</sub>O<sub>3</sub>-KY

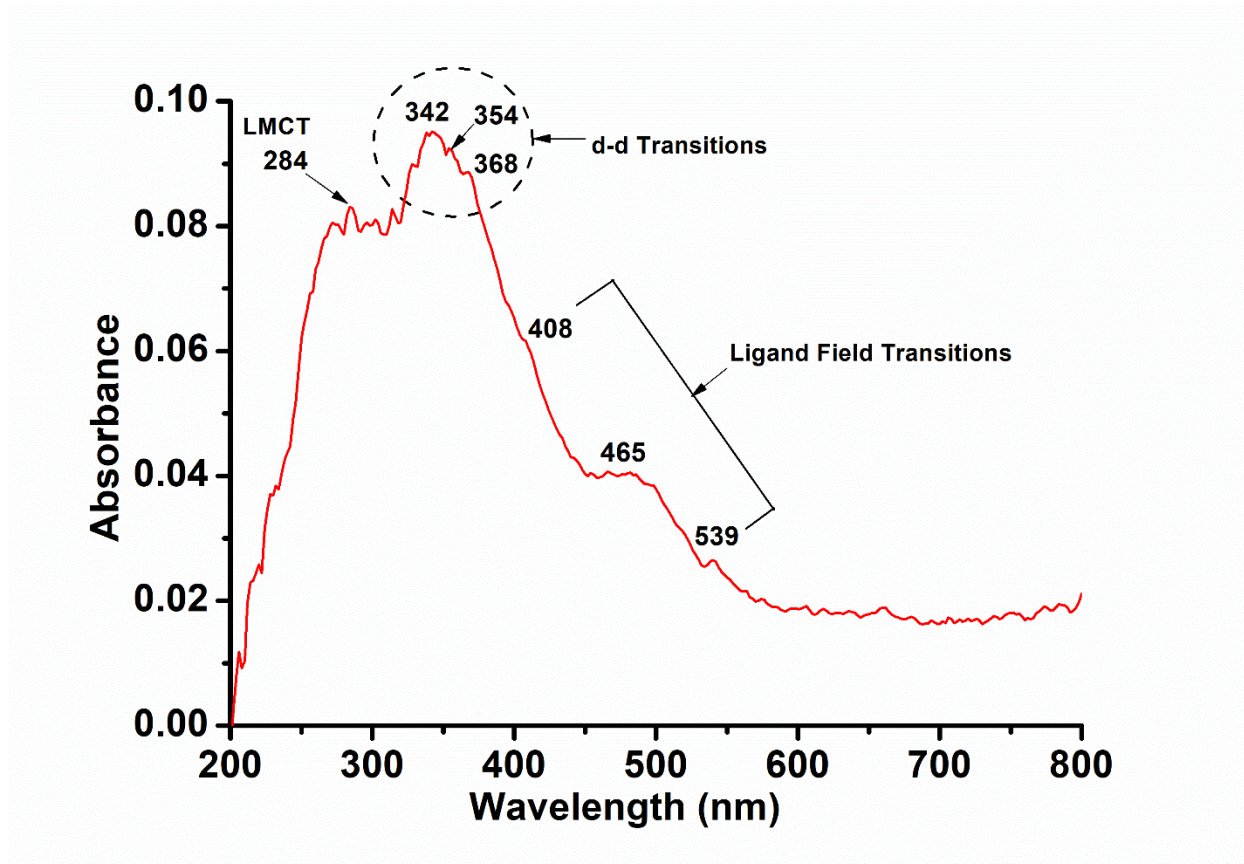

Fig. S6 UV-vis diffused reflectance spectrum of Fe<sub>2</sub>O<sub>3</sub>-KY.

## Electronic Supplementary Information

### 4 X-ray crystallography

X-ray diffraction data were collected on a Bruker SMART Apex II CCD diffractometer using Mo K $\alpha$  ( $\lambda = 0.71073$  Å) radiation<sup>6</sup> and X-ray diffraction data for all crystals were collected using Bruker SMART software. This software is also used for indexing and determination of the unit cell parameters. Cell structures were solved by direct method and refined by full-matrix least squares against F<sup>2</sup> of all data, using SHELXTL software. All the non-H-atoms were refined by full-matrix least squares in anisotropic, all H-atoms in isotropic approximation, against F<sup>2</sup> of all reflections. Some hydrogen atoms attached to these atoms were treated as ‘riding’ in calculated positions. The crystallographic tables for the compound **3b**, **3h**, **3v** and **3z** are given in the table S1, which includes the crystal parameters and the refinement factor. The molecular structures were drawn at MERCURY.<sup>7</sup>

The CIF files containing complete information of the studied structures of compound **3b**, **3h**, **3v** and **3z** were deposited with CCDC, deposition number 2217708, 2217706, 2217707, and 2220406, respectively which are freely available upon request from the Director, CCDC, 12 Union Road, Cambridge CB21EZ, UK (Fax: +44-1223-336033; email:deposit@ccdc.cam.ac.uk) or from the following website: [www.ccdc.cam.ac.uk/data\\_request/cif](http://www.ccdc.cam.ac.uk/data_request/cif)

The compound **3b** crystallizes in orthorhombic P2<sub>1</sub>2<sub>1</sub>2<sub>1</sub> space group and their asymmetric unit contain the whole molecule whereas compound **3h** and **3v** crystallize in monoclinic P2<sub>1</sub>/c space group. The asymmetric of compound **3z** contains two molecules and crystallizes in triclinic P-1 space group.

## Electronic Supplementary Information

**Table S1:** Crystallographic data and refinement parameters for the compound **3h**, **3v**, **3b** and **3z**:

| Compound name                          | Compound 3b                                        | Compound 3h                                    | Compound 3v                                      | Compound 3z                                    |
|----------------------------------------|----------------------------------------------------|------------------------------------------------|--------------------------------------------------|------------------------------------------------|
| chemical formula                       | C <sub>18</sub> H <sub>16</sub> O <sub>2</sub>     | C <sub>18</sub> H <sub>16</sub> O <sub>3</sub> | C <sub>18</sub> H <sub>15</sub> BrO <sub>2</sub> | C <sub>20</sub> H <sub>18</sub> O <sub>4</sub> |
| CCDC deposition number                 | 2217708                                            | 2217706                                        | 2217707                                          | 2220406                                        |
| formula mass                           | 264.31                                             | 280.31                                         | 343.20                                           | 322.34                                         |
| crystal system                         | Orthorhombic                                       | Monoclinic                                     | Monoclinic                                       | Triclinic                                      |
| space group                            | <i>P 2<sub>1</sub> 2<sub>1</sub> 2<sub>1</sub></i> | <i>P21/c</i>                                   | <i>P21/c</i>                                     | <i>P-1</i>                                     |
| a/Å                                    | 5.695(3)                                           | 8.3525(7)                                      | 15.974(7)                                        | 10.610(2)                                      |
| b/Å                                    | 15.637(8)                                          | 11.4569(9)                                     | 5.729(3)                                         | 12.799(3)                                      |
| c/Å                                    | 15.874(8)                                          | 14.7293(11)                                    | 18.827(11)                                       | 14.258(3)                                      |
| α/°                                    | 90.00                                              | 90.00                                          | 90.00                                            | 63.537(5)                                      |
| β/°                                    | 90.00                                              | 90.936(2)                                      | 119.690(11)                                      | 72.847(5)                                      |
| γ/°                                    | 90.00                                              | 90.00                                          | 90.00                                            | 80.933(5)                                      |
| V/Å <sup>3</sup>                       | 1413.6(13)                                         | 1409.31(19)                                    | 1496.8(13)                                       | 1655.5(6)                                      |
| T/K                                    | 293(2)                                             | 296(2)                                         | 296(2)                                           | 296(2)                                         |
| Density (g cm <sup>-3</sup> )          | 1.242                                              | 1.321                                          | 1.523                                            | 1.293                                          |
| Z                                      | 4                                                  | 4                                              | 4                                                | 4                                              |
| radiation type                         | Mo Kα                                              | Mo Kα                                          | Mo Kα                                            | Mo Kα                                          |
| absorption coefficient, μ/mm-1         | 0.080                                              | 0.089                                          | 2.748                                            | 0.090                                          |
| Total no. of reflections measured      | 4164                                               | 3584                                           | 3960                                             | 7833                                           |
| Reflections, <i>I</i> > 2σ( <i>I</i> ) | 1239                                               | 2636                                           | 1847                                             | 4026                                           |
| Complete to 2θ (%)                     | 98.2                                               | 99.6                                           | 99.3                                             | 98.7                                           |
| Ranges (h, k, l)                       | -7 ≤ h ≤ 7<br>-21 ≤ k ≤ 21<br>-21 ≤ l ≤ 22         | -11 ≤ h ≤ 11<br>-15 ≤ k ≤ 15<br>-19 ≤ l ≤ 19   | -21 ≤ h ≤ 21<br>-7 ≤ k ≤ 7<br>-25 ≤ l ≤ 25       | -13 ≤ h ≤ 13<br>-16 ≤ k ≤ 16<br>-18 ≤ l ≤ 18   |
| Data/ Restraints/Parameters            | 4164/1/235                                         | 3584/0/193                                     | 3960/0/192                                       | 7833/2/439                                     |
| R indices [ <i>I</i> > 2σ( <i>I</i> )] | 0.0851                                             | 0.0446                                         | 0.0600                                           | 0.0570                                         |
| R indices (all data)                   | 0.2664                                             | 0.0659                                         | 0.1547                                           | 0.1257                                         |
| wR(F <sub>2</sub> ) (all data)         | 0.2597                                             | 0.0968                                         | 0.1955                                           | 0.1992                                         |
| Goodness-of-fit                        | 0.916                                              | 1.048                                          | 1.014                                            | 1.030                                          |

## Electronic Supplementary Information

### 5 General procedure for benzylation of 2-naphthols

The reaction was performed with various other substituted primary alcohols with different substituted naphthols, after optimizing the various reaction parameters *i.e.* solvent, catalyst amount, time and temperature. The reaction was performed in a 50 mL round bottom flask with appropriate amount of naphthols (1 mmol) and benzyl alcohols (1 mmol) immersed in oil bath at 110 °C under refluxing condition using 15 mg of F<sub>2</sub>O<sub>3</sub>-KY catalyst and 1 mL of dichloroethane (DCE) as solvent for 6 hours. The progress of the reaction was monitored by TLC. After completion of the reaction, the reaction mixture was diluted with ethyl acetate (CH<sub>3</sub>COOC<sub>2</sub>H<sub>5</sub>) and filtered. The heterogeneous catalyst was recovered and washed with ethanol and warm water several times for further use. The solvent was evaporated under reduced pressure, and the residue obtained was purified and isolated by column chromatography (hexane/ethyl acetate) on silica gel to get the desired benzylated product. Different isolated products are characterized by <sup>1</sup>H, <sup>13</sup>C NMR. All the naphthol derivatives and alcohol derivatives are purchased from Merck and Sigma Aldrich, solvents used were of HPLC grade and were brought from E-Merck.

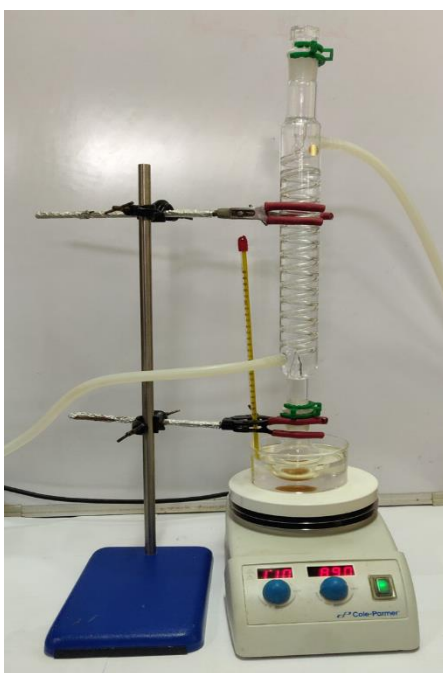

A photograph of reaction set-up.

## Electronic Supplementary Information

### 6 Characterization of the compound

#### ❖ NMR Analysis of synthesized compounds

##### Compound 3a: 1-benzyl-naphthalen-2-ol

$^1\text{H}$  NMR (400 MHz,  $\text{CDCl}_3$ )  $\delta$  7.90 (d,  $J = 8.5$  Hz, 1H), 7.78 (d,  $J = 8.1$  Hz, 1H), 7.69 (d,  $J = 8.8$  Hz, 1H), 7.42 (t,  $J = 7.5$  Hz, 1H), 7.32 (t,  $J = 7.5$  Hz, 1H), 7.26 – 7.12 (m, 5H), 7.09 (d,  $J = 8.8$  Hz, 1H), 5.02 (s, 1H), 4.44 (s, 2H).

$^{13}\text{C}$  NMR (101 MHz,  $\text{CDCl}_3$ )  $\delta$  151.3, 140.1, 133.8, 129.6, 128.7, 128.7, 128.6, 128.3, 126.8, 126.2, 123.4, 118.3, 118.0, 30.8.

HRMS (ESI)  $m/z$  calcd for  $\text{C}_{17}\text{H}_{14}\text{O}$ : 234.1045, found 234.1048.

The spectroscopic data were in accordance with literature.<sup>8</sup>

##### Compound 3b: 1-(4-methoxybenzyl)naphthalen-2-ol

The spectroscopic data were in consistent with literature.<sup>8</sup>

$^1\text{H}$  NMR (400 MHz,  $\text{CDCl}_3$ )  $\delta$  7.82 (d,  $J = 8.5$  Hz, 1H), 7.68 (d,  $J = 8.1$  Hz, 1H), 7.58 (d,  $J = 8.8$  Hz, 1H), 7.33 (dd,  $J = 8.4, 6.8, 1.3$  Hz, 1H), 7.22 (t,  $J = 7.0$  Hz, 1H), 7.00 (dd,  $J = 17.0, 8.8$  Hz, 3H), 6.71 – 6.65 (m, 2H), 5.21 (s, 1H), 4.28 (s, 2H), 3.63 (s, 3H).

$^{13}\text{C}$  NMR (101 MHz,  $\text{CDCl}_3$ )  $\delta$  158.0, 151.3, 133.7, 132.1, 129.5, 129.2, 128.6, 126.7, 123.4, 118.6, 118.0, 114.1, 55.4, 29.9.

##### Compound 3c: 1-(4-methylbenzyl)naphthalen-2-ol

The spectroscopic data were in accordance with the literature.<sup>8</sup>

$^1\text{H}$  NMR (500 MHz,  $\text{CDCl}_3$ )  $\delta$  7.92 (d,  $J = 8.5$  Hz, 1H), 7.79 (d,  $J = 8.1$  Hz, 1H), 7.70 (d,  $J = 8.8$  Hz, 1H), 7.43 (t,  $J = 7.7$  Hz, 1H), 7.32 (t,  $J = 7.0$  Hz, 1H), 7.10 (dd,  $J = 8.4, 4.7$  Hz, 3H), 7.05 (d,  $J = 7.9$  Hz, 2H), 4.98 (s, 1H), 4.41 (s, 2H), 2.28 (s, 3H).

$^{13}\text{C}$  NMR (126 MHz,  $\text{CDCl}_3$ )  $\delta$  151.4, 136.9, 135.8, 133.8, 129.6, 129.5, 128.7, 128.6, 128.2, 123.5, 123.3, 118.5, 118.07, 30.4, 21.1.

##### Compound 3d: 1-(4-isopropylbenzyl)naphthalen-2-ol

$^1\text{H}$  NMR (600 MHz,  $\text{CDCl}_3$ )  $\delta$  7.92 (d,  $J = 8.5$  Hz, 1H), 7.77 (d,  $J = 8.1$  Hz, 1H), 7.68 (d,  $J = 8.8$  Hz, 1H), 7.42 (t,  $J = 7.2$  Hz, 1H), 7.31 (t,  $J = 7.3$  Hz, 1H), 7.13 (d,  $J = 7.5$  Hz, 2H), 7.09 (dd,  $J = 7.5, 5.9$  Hz, 3H), 5.37 (s, 1H), 4.41 (s, 2H), 2.87 – 2.79 (m, 1H), 1.19 (d,  $J = 6.9$  Hz, 6H).

$^{13}\text{C}$  NMR (126 MHz,  $\text{CDCl}_3$ )  $\delta$  151.5, 146.8, 137.3, 133.8, 129.6, 128.6, 128.5, 128.2, 126.7, 123.5, 123.2, 118.5, 118.1, 33.8, 30.4, 24.1.

Anal. calcd. For  $\text{C}_{20}\text{H}_{20}\text{O}$ : C, 86.92; H, 7.29; found C, 87.11; H, 7.36.

## Electronic Supplementary Information

### Compound 3e: 1-(2-hydroxybenzyl)naphthalen-2-ol

$^1\text{H}$  NMR (600 MHz,  $\text{CDCl}_3$ )  $\delta$  8.24 (d,  $J = 8.6$  Hz, 1H), 7.76 (d,  $J = 8.1$  Hz, 1H), 7.62 (d,  $J = 8.8$  Hz, 1H), 7.53 (t,  $J = 7.7$  Hz, 1H), 7.42 (d,  $J = 7.6$  Hz, 1H), 7.34 (t,  $J = 7.5$  Hz, 1H), 7.11 – 7.04 (m, 2H), 6.87 – 6.77 (m, 2H), 4.39 (s, 2H).

$^{13}\text{C}$  NMR (151 MHz,  $\text{CDCl}_3$ )  $\delta$  153.3, 150.5, 133.5, 131.1, 129.9, 128.9, 127.9, 126.8, 126.3, 123.4, 121.3, 118.3, 118.1, 115.9, 25.4.

HRMS (ESI)  $m/z$  calcd for  $\text{C}_{17}\text{H}_{15}\text{O}_2$   $[\text{M}+\text{H}]^+$ : 251.1067, found 251.1075.

### Compound 3f: 1-(thiophen-2-ylmethyl)naphthalen-2-ol

$^1\text{H}$  NMR (400 MHz,  $\text{CDCl}_3$ )  $\delta$  7.96 (d,  $J = 8.5$  Hz, 1H), 7.77 (d,  $J = 8.1$  Hz, 1H), 7.68 (d,  $J = 8.8$  Hz, 1H), 7.46 (t,  $J = 7.6$  Hz, 1H), 7.33 (t,  $J = 7.4$  Hz, 1H), 7.14 – 7.03 (m, 2H), 6.87 – 6.82 (m, 1H), 6.77 (d,  $J = 2.2$  Hz, 1H), 5.25 (s, 1H), 4.58 (s, 2H).

$^{13}\text{C}$  NMR (126 MHz,  $\text{CDCl}_3$ )  $\delta$  151.1, 143.5, 133.3, 129.6, 128.9, 128.7, 126.9, 124.9, 123.8, 123.5, 123.2, 118.4, 118.0, 25.5.

The spectroscopic data were in consistant with literature.<sup>9</sup>

### Compound 3g: 1-benzyl-naphthalene-2,7-diol

$^1\text{H}$  NMR (400 MHz, MeOD)  $\delta$  7.49 (d,  $J = 8.8$  Hz, 1H), 7.43 (d,  $J = 8.7$  Hz, 1H), 7.08 (dt,  $J = 15.0, 7.5$  Hz, 4H), 7.02 (d,  $J = 1.5$  Hz, 1H), 6.97 (t,  $J = 6.9$  Hz, 1H), 6.87 (d,  $J = 8.8$  Hz, 1H), 6.72 (dd,  $J = 8.7, 2.2$  Hz, 1H), 4.23 (s, 2H).

$^{13}\text{C}$  NMR (126 MHz, MeOD)  $\delta$  156.7, 154.2, 142.8, 136.9, 131.0, 129.4, 129.1, 128.8, 126.4, 125.4, 117.9, 115.8, 115.5, 106.4, 31.5.

HRMS (ESI)  $m/z$  calcd for  $\text{C}_{17}\text{H}_{15}\text{O}_2$   $[\text{M}+\text{H}]^+$ : 251.1067, found 251.1079.

### Compound 3h: 1-(4-methoxybenzyl)naphthalene-2,7-diol

$^1\text{H}$  NMR (400 MHz, MeOD)  $\delta$  7.48 (d,  $J = 8.7$  Hz, 1H), 7.41 (d,  $J = 8.8$  Hz, 1H), 7.01 (d,  $J = 8.2$  Hz, 3H), 6.85 (d,  $J = 8.9$  Hz, 1H), 6.71 (dd,  $J = 8.7, 2.3$  Hz, 1H), 6.64 (d,  $J = 8.6$  Hz, 2H), 4.15 (s, 2H), 3.61 (s, 3H).

$^{13}\text{C}$  NMR (151 MHz, MeOD)  $\delta$  159.0, 156.6, 154.1, 136.8, 134.7, 130.9, 130.2, 128.7, 125.3, 118.2, 115.7, 115.5, 114.5, 106.4, 55.5, 30.6.

Anal. calcd. for  $\text{C}_{18}\text{H}_{16}\text{O}_3$ : C, 77.12; H, 5.75; found C, 77.23; H, 5.83.

### Compound 3i: 1-(4-methylbenzyl)naphthalene-2,7-diol

$^1\text{H}$  NMR (400 MHz,  $\text{CDCl}_3$ )  $\delta$  7.68 (d,  $J = 8.7$  Hz, 1H), 7.61 (d,  $J = 8.7$  Hz, 1H), 7.17 (d,  $J = 1.6$  Hz, 1H), 7.06 (q,  $J = 8.1$  Hz, 4H), 6.93 (dd,  $J = 13.0, 5.6$  Hz, 2H), 5.00 (d,  $J = 17.8$  Hz, 2H), 4.31 (s, 2H), 2.28 (s, 3H).



## Electronic Supplementary Information

$^{13}\text{C}$  NMR (101 MHz,  $\text{CDCl}_3$ )  $\delta$  154.5, 152.1, 136.8, 135.8, 135.3, 130.7, 129.5, 128.5, 128.2, 125.0, 116.9, 115.6, 115.0, 106.0, 30.5, 21.1.

HRMS (ESI)  $m/z$  calcd for  $\text{C}_{18}\text{H}_{17}\text{O}_2$   $[\text{M}+\text{H}]^+$ : 265.1223, found 265.1236.

### Compound 3j: 1-(4-isopropylbenzyl)naphthalene-2,7-diol

$^1\text{H}$  NMR (600 MHz,  $\text{CDCl}_3$ )  $\delta$  7.68 (d,  $J = 8.7$  Hz, 1H), 7.61 (d,  $J = 8.7$  Hz, 1H), 7.17 (s, 1H), 7.13 – 7.07 (m, 4H), 6.94 (dd,  $J = 13.4, 8.8$  Hz, 2H), 5.21 (d,  $J = 163.1$  Hz, 2H), 4.31 (s, 2H), 2.84 (dp,  $J = 13.5, 6.7$  Hz, 1H), 1.20 (d,  $J = 6.9$  Hz, 6H).

$^{13}\text{C}$  NMR (151 MHz,  $\text{CDCl}_3$ )  $\delta$  154.4, 152.1, 146.9, 137.1, 135.3, 130.6, 128.4, 128.2, 126.8, 125.0, 116.9, 115.6, 115.0, 106.0, 33.8, 24.1.

Anal. calcd. for  $\text{C}_{20}\text{H}_{20}\text{O}_2$ : C, 82.16; H, 6.90; found C, 82.35; H, 6.99.

### Compound 3k: 1-(thiophen-2-ylmethyl)naphthalene-2,7-diol

$^1\text{H}$  NMR (400 MHz,  $\text{CDCl}_3$ )  $\delta$  7.64 (d,  $J = 8.7$  Hz, 1H), 7.57 (d,  $J = 8.7$  Hz, 1H), 7.21 (d,  $J = 1.8$  Hz, 1H), 7.05 (d,  $J = 5.0$  Hz, 1H), 6.91 (dd,  $J = 12.9, 5.6$  Hz, 2H), 6.84 – 6.78 (m, 1H), 6.72 (d,  $J = 2.6$  Hz, 1H), 5.48 (d,  $J = 70.7$  Hz, 2H), 4.45 (s, 2H).

$^{13}\text{C}$  NMR (126 MHz,  $\text{CDCl}_3$ )  $\delta$  154.5, 151.7, 143.5, 134.9, 130.7, 128.8, 126.9, 124.9, 124.8, 124.7, 123.7, 116.9, 115.6, 115.2, 105.8, 25.6.

Anal. calcd. for  $\text{C}_{15}\text{H}_{12}\text{O}_2\text{S}$ : C, 70.29; H, 4.72; found C, 70.41; H, 4.67.

### Compound 3l: 1-(4-chlorobenzyl)naphthalene-2,7-diol

$^1\text{H}$  NMR (400 MHz,  $\text{CDCl}_3$ )  $\delta$  7.68 (d,  $J = 8.8$  Hz, 1H), 7.61 (d,  $J = 8.7$  Hz, 1H), 7.18 (d,  $J = 8.3$  Hz, 2H), 7.11 (d,  $J = 8.6$  Hz, 3H), 6.97 – 6.87 (m, 2H), 5.11 (s, 2H), 4.31 (s, 2H).

$^{13}\text{C}$  NMR (101 MHz,  $\text{CDCl}_3$ )  $\delta$  154.6, 151.9, 138.8, 135.2, 131.8, 130.7, 129.7, 128.7, 125.0, 116.5, 115.5, 115.1, 105.9, 30.3.

HRMS (ESI)  $m/z$  calcd for  $\text{C}_{17}\text{H}_{14}\text{ClO}_2$   $[\text{M}+\text{H}]^+$ : 285.0677, found 285.0684.

### Compound 3m: 1-benzyl-7-methoxynaphthalen-2-ol

$^1\text{H}$  NMR (400 MHz,  $\text{CDCl}_3$ )  $\delta$  7.67 – 7.63 (m, 1H), 7.58 (d,  $J = 8.7$  Hz, 1H), 7.22 (s, 1H), 7.21 – 7.11 (m, 5H), 6.97 (dd,  $J = 8.9, 2.2$  Hz, 1H), 6.91 (d,  $J = 8.8$  Hz, 1H), 5.10 (d,  $J = 30.3$  Hz, 1H), 4.38 (s, 2H), 3.80 – 3.75 (m, 3H).

$^{13}\text{C}$  NMR (101 MHz,  $\text{CDCl}_3$ )  $\delta$  158.4, 151.9, 140.4, 135.1, 130.2, 128.7, 128.3, 126.2, 117.6, 115.4, 102.8, 55.3, 31.1.

The spectroscopic data were in accordance with the literature.<sup>9</sup>

### Compound 3n: 7-methoxy-1-(4-methoxybenzyl)naphthalen-2-ol

## Electronic Supplementary Information

$^1\text{H}$  NMR (600 MHz,  $\text{CDCl}_3$ )  $\delta$  7.67 (d,  $J = 8.9$  Hz, 1H), 7.60 (d,  $J = 8.7$  Hz, 1H), 7.25 (s, 1H), 7.15 (d,  $J = 8.3$  Hz, 2H), 6.98 (d,  $J = 8.8$  Hz, 1H), 6.94 (s, 1H), 6.78 (d,  $J = 8.3$  Hz, 2H), 5.05 (s, 1H), 4.33 (s, 2H), 3.82 (s, 3H), 3.74 (s, 3H).

$^{13}\text{C}$  NMR (151 MHz,  $\text{CDCl}_3$ )  $\delta$  158.5, 151.9, 135.1, 132.1, 130.2, 129.3, 128.2, 125.0, 117.8, 115.5, 115.4, 114.4, 114.2, 102.7, 55.4, 55.3, 30.2.

Anal. calcd. for  $\text{C}_{19}\text{H}_{18}\text{O}_3$ : C, 77.53; H, 6.16; found C, 77.66; H, 6.25.

### Compound 3o: 7-methoxy-1-(4-methylbenzyl)naphthalen-2-ol

$^1\text{H}$  NMR (400 MHz,  $\text{CDCl}_3$ )  $\delta$  7.67 (d,  $J = 8.9$  Hz, 1H), 7.60 (d,  $J = 8.7$  Hz, 1H), 7.18 (s, 1H), 7.12 (d,  $J = 7.9$  Hz, 2H), 7.05 (d,  $J = 8.0$  Hz, 2H), 6.98 (dd,  $J = 9.0, 2.3$  Hz, 1H), 6.94 (d,  $J = 8.7$  Hz, 1H), 5.03 (s, 1H), 4.35 (s, 2H), 3.82 (s, 3H), 2.28 (s, 3H).

$^{13}\text{C}$  NMR (101 MHz,  $\text{CDCl}_3$ )  $\delta$  151.9, 137.1, 135.8, 135.2, 130.2, 129.4, 129.2, 128.3, 128.1, 127.3, 117.8, 115.5, 102.8, 55.3, 30.7, 21.1.

Anal. calcd. for  $\text{C}_{19}\text{H}_{18}\text{O}_2$ : C, 81.99; H, 6.52; found C, 82.14; H, 6.68.

### Compound 3p: 1-(4-isopropylbenzyl)-7-methoxynaphthalen-2-ol

$^1\text{H}$  NMR (600 MHz,  $\text{CDCl}_3$ )  $\delta$  7.67 (d,  $J = 8.9$  Hz, 1H), 7.60 (d,  $J = 8.7$  Hz, 1H), 7.20 (s, 1H), 7.16 (d,  $J = 7.9$  Hz, 2H), 7.10 (d,  $J = 8.0$  Hz, 2H), 6.98 (dd,  $J = 8.9, 2.0$  Hz, 1H), 6.95 (d,  $J = 8.7$  Hz, 1H), 5.01 (s, 1H), 4.36 (s, 2H), 3.82 (s, 3H), 2.87 – 2.80 (m, 1H), 1.20 (d,  $J = 6.9$  Hz, 6H).

$^{13}\text{C}$  NMR (151 MHz,  $\text{CDCl}_3$ )  $\delta$  158.50 (s), 151.9, 146.8, 137.3, 135.1, 130.4, 130.2, 128.3, 128.0, 126.8, 125.0, 117.8, 115.5, 115.5, 102.7, 55.3, 33.8, 30.7, 24.1.

Anal. calcd. for  $\text{C}_{21}\text{H}_{22}\text{O}_2$ : C, 82.32; H, 7.24; found C, 82.44; H, 7.18.

### Compound 3q: 1-(2-hydroxybenzyl)-7-methoxynaphthalen-2-ol

$^1\text{H}$  NMR (600 MHz,  $\text{CDCl}_3$ )  $\delta$  7.64 (d,  $J = 8.9$  Hz, 1H), 7.54 – 7.49 (m, 2H), 7.44 (d,  $J = 7.5$  Hz, 1H), 7.07 (dd,  $J = 14.6, 7.2$  Hz, 2H), 7.00 (d,  $J = 8.8$  Hz, 1H), 6.92 (d,  $J = 8.7$  Hz, 1H), 6.86 (t,  $J = 7.4$  Hz, 1H), 6.82 (d,  $J = 8.0$  Hz, 1H), 4.33 (s, 2H), 3.96 (s, 3H).

$^{13}\text{C}$  NMR (151 MHz,  $\text{CDCl}_3$ )  $\delta$  158.5, 153.6, 150.8, 134.9, 131.1, 130.4, 128.6, 128.0, 126.1, 125.3, 121.0, 117.2, 116.1, 115.6, 115.3, 102.9, 55.5, 26.1.

Anal. calcd. for  $\text{C}_{18}\text{H}_{16}\text{O}_3$ : C, 77.12; H, 5.75; found C, 77.29; H, 5.83.

### Compound 3r: 7-methoxy-1-(thiophen-2-ylmethyl)naphthalen-2-ol

$^1\text{H}$  NMR (600 MHz,  $\text{CDCl}_3$ )  $\delta$  7.70 (d,  $J = 8.9$  Hz, 1H), 7.62 (d,  $J = 8.7$  Hz, 1H), 7.31 (t,  $J = 7.7$  Hz, 2H), 7.03 – 7.00 (m, 2H), 6.95 (d,  $J = 8.7$  Hz, 1H), 6.89 (dd,  $J = 13.3, 8.5$  Hz, 1H), 5.77 (s, 1H), 4.58 (s, 2H), 3.90 (s, 3H).

$^{13}\text{C}$  NMR (151 MHz,  $\text{CDCl}_3$ )  $\delta$  151.7, 143.9, 134.7, 130.2, 128.5, 127.0, 126.9, 125.7, 124.8, 123.5, 117.6, 115.6, 102.4, 55.3, 25.7.

## Electronic Supplementary Information

Anal. calcd. for C<sub>16</sub>H<sub>14</sub>O<sub>2</sub>S: C, 71.09; H, 5.22; found C, 71.26; H, 5.31.

**Compound 3s:** 1-([1,1'-biphenyl]-4-ylmethyl)-7-methoxynaphthalen-2-ol

<sup>1</sup>H NMR (600 MHz, CDCl<sub>3</sub>) δ 7.68 (d, *J* = 8.9 Hz, 1H), 7.62 (d, *J* = 8.7 Hz, 1H), 7.53 (d, *J* = 7.7 Hz, 2H), 7.46 (d, *J* = 7.9 Hz, 2H), 7.39 (t, *J* = 7.5 Hz, 2H), 7.30 (d, *J* = 7.5 Hz, 3H), 7.20 (s, 1H), 7.00 (d, *J* = 8.9 Hz, 1H), 6.96 (d, *J* = 8.7 Hz, 1H), 5.11 (s, 1H), 4.44 (s, 2H), 3.82 (s, 3H).

<sup>13</sup>C NMR (126 MHz, CDCl<sub>3</sub>) δ 158.4, 151.8, 141.0, 139.3, 139.0, 135.0, 130.1, 128.7, 128.3, 127.3, 127.0, 124.9, 117.4, 115.4, 102.6, 55.2, 30.7.

Anal. calcd. for C<sub>24</sub>H<sub>20</sub>O<sub>2</sub>: C, 84.68; H, 5.92; found C, 84.81; H, 6.01.

**Compound 3t:** 1-(4-chlorobenzyl)-7-methoxynaphthalen-2-ol

<sup>1</sup>H NMR (400 MHz, CDCl<sub>3</sub>) δ 7.67 (d, *J* = 8.7 Hz, 1H), 7.62 (d, *J* = 8.7 Hz, 1H), 7.31 (t, *J* = 5.9 Hz, 1H), 7.17 (d, *J* = 9.4 Hz, 3H), 7.09 (s, 1H), 6.99 (dd, *J* = 8.8, 2.3 Hz, 1H), 6.95 – 6.92 (m, 1H), 5.00 (s, 1H), 4.36 (s, 2H), 3.81 (s, 3H).

<sup>13</sup>C NMR (101 MHz, CDCl<sub>3</sub>) δ 151.7, 139.0, 130.3, 129.7, 128.8, 128.7, 128.5, 128.4, 125.0, 117.2, 115.6, 115.3, 102.6, 55.3, 30.4.

Anal. calcd. for C<sub>18</sub>H<sub>15</sub>ClO<sub>2</sub>: C, 72.36; H, 5.06; found C, 72.51; H, 5.22.

**Compound 3u:** 1-benzyl-6-bromonaphthalen-2-ol

<sup>1</sup>H NMR (600 MHz, CDCl<sub>3</sub>) δ 7.93 (s, 1H), 7.76 (d, *J* = 9.1 Hz, 1H), 7.61 (d, *J* = 8.8 Hz, 1H), 7.48 (d, *J* = 9.1 Hz, 1H), 7.28 – 7.21 (m, 3H), 7.17 (s, 2H), 7.12 (d, *J* = 8.9 Hz, 1H), 5.06 (s, 1H), 4.42 (s, 2H).

<sup>13</sup>C NMR (151 MHz, CDCl<sub>3</sub>) δ 151.6, 139.7, 132.4, 130.8, 130.5, 130.0, 128.8, 128.3, 127.7, 126.4, 125.4, 119.1, 118.7, 117.2, 30.8.

The spectroscopic data were in consistant with literature.<sup>9</sup>

**Compound 3v:** 6-bromo-1-(4-methoxybenzyl)naphthalen-2-ol

<sup>1</sup>H NMR (400 MHz, CDCl<sub>3</sub>) δ 7.92 (s, 1H), 7.77 (d, *J* = 9.0 Hz, 1H), 7.59 (d, *J* = 8.9 Hz, 1H), 7.48 (d, *J* = 10.8 Hz, 1H), 7.09 (dd, *J* = 12.2, 8.7 Hz, 3H), 6.78 (d, *J* = 8.5 Hz, 2H), 5.11 (s, 1H), 4.34 (s, 2H), 3.74 (s, 3H).

<sup>13</sup>C NMR (101 MHz, CDCl<sub>3</sub>) δ 151.7, 136.5, 136.0, 132.4, 130.8, 130.5, 130.0, 129.5, 128.1, 127.7, 125.4, 119.2, 118.9, 117.1, 30.4, 21.1.

Anal. calcd. for C<sub>18</sub>H<sub>15</sub>BrO<sub>2</sub>: C, 62.99; H, 4.41; found C, 63.19; H, 4.53.

**Compound 3w:** 6-bromo-1-(4-methylbenzyl)naphthalen-2-ol

<sup>1</sup>H NMR (400 MHz, CDCl<sub>3</sub>) δ 7.93 (d, *J* = 1.5 Hz, 1H), 7.77 (d, *J* = 9.1 Hz, 1H), 7.60 (d, *J* = 8.9 Hz, 1H), 7.48 (dd, *J* = 9.2, 1.6 Hz, 1H), 7.12 (d, *J* = 8.8 Hz, 1H), 7.09 – 6.99 (m, 4H), 5.07 (s, 1H), 4.37 (s, 2H), 2.28 (s, 3H).

## Electronic Supplementary Information

$^{13}\text{C}$  NMR (101 MHz,  $\text{CDCl}_3$ )  $\delta$  158.3, 151.7, 132.4, 131.7, 130.9, 130.6, 130.0, 129.2, 127.7, 125.4, 119.14, 119.07, 117.1, 114.3, 55.4, 30.0.

Anal. calcd. for  $\text{C}_{18}\text{H}_{15}\text{BrO}$ : C, 66.07; H, 4.62; found C, 66.17; H, 4.71.

**Compound 3x:** 6-bromo-1-(thiophen-2-ylmethyl)naphthalen-2-ol

$^1\text{H}$  NMR (600 MHz,  $\text{CDCl}_3$ )  $\delta$  7.93 (s, 1H), 7.83 (d,  $J = 9.1$  Hz, 1H), 7.60 (d,  $J = 8.8$  Hz, 1H), 7.52 (d,  $J = 9.0$  Hz, 1H), 7.13 – 7.08 (m, 2H), 6.86 (t,  $J = 4.2$  Hz, 1H), 6.75 (s, 1H), 5.16 (s, 1H), 4.56 (s, 2H).

$^{13}\text{C}$  NMR (151 MHz,  $\text{CDCl}_3$ )  $\delta$  151.3, 142.9, 131.9, 130.8, 130.6, 130.1, 128.0, 127.0, 125.1, 125.0, 124.0, 119.1, 118.7, 117.3, 25.5.

Anal. calcd. for  $\text{C}_{15}\text{H}_{11}\text{BrOS}$ : C, 56.44; H, 3.47; found C, 56.52; H, 3.45

**Compound 3y:** 1-([1,1'-biphenyl]-4-ylmethyl)naphthalene-2,7-diol

$^1\text{H}$  NMR (600 MHz,  $\text{CDCl}_3$ )  $\delta$  7.70 (d,  $J = 8.7$  Hz, 1H), 7.64 (d,  $J = 8.7$  Hz, 1H), 7.53 (d,  $J = 7.6$  Hz, 2H), 7.47 (d,  $J = 8.0$  Hz, 2H), 7.40 (t,  $J = 7.6$  Hz, 2H), 7.31 (t,  $J = 7.3$  Hz, 1H), 7.27 (d,  $J = 7.7$  Hz, 4H), 6.96 (d,  $J = 5.8$  Hz, 1H), 5.00 (d,  $J = 6.9$  Hz, 2H), 4.40 (s, 2H).

$^{13}\text{C}$  NMR (151 MHz,  $\text{CDCl}_3$ )  $\delta$  154.5, 152.0, 141.1, 139.3, 139.1, 135.3, 130.7, 128.84, 128.8, 128.7, 128.6, 128.6, 127.5, 127.49, 127.19, 127.16, 127.1, 125.1, 116.8, 115.6, 115.1, 106.0, 30.6.

Anal. calcd. for  $\text{C}_{23}\text{H}_{18}\text{O}_2$ : C, 84.64; H, 5.56; found: C, 84.73; H, 5.63.

**Compound 3z:** methyl 6-hydroxy-5-(4-methoxybenzyl)-2-naphthoate

$^1\text{H}$  NMR (600 MHz, MeOD)  $\delta$  8.48 (s, 1H), 7.89 (q,  $J = 8.9$  Hz, 2H), 7.79 (d,  $J = 8.8$  Hz, 1H), 7.27 (d,  $J = 8.8$  Hz, 1H), 7.11 (d,  $J = 8.3$  Hz, 2H), 6.75 (d,  $J = 8.3$  Hz, 2H), 4.36 (s, 2H), 3.93 (s, 3H), 3.71 (s, 3H).

$^{13}\text{C}$  NMR (151 MHz, MeOD)  $\delta$  169.0, 159.2, 156.3, 137.7, 134.4, 132.6, 130.6, 130.2, 129.2, 126.2, 124.9, 124.7, 120.4, 119.8, 114.6, 55.6, 52.5, 30.4.

HRMS (ESI)  $m/z$  calcd for  $\text{C}_{20}\text{H}_{19}\text{O}_4$   $[\text{M}+\text{H}]^+$ : 323.1278, found 323.1273.

# Electronic Supplementary Information

## ❖ NMR Spectra of Compounds

### Compound 3a: 1-benzyl-naphthalen-2-ol

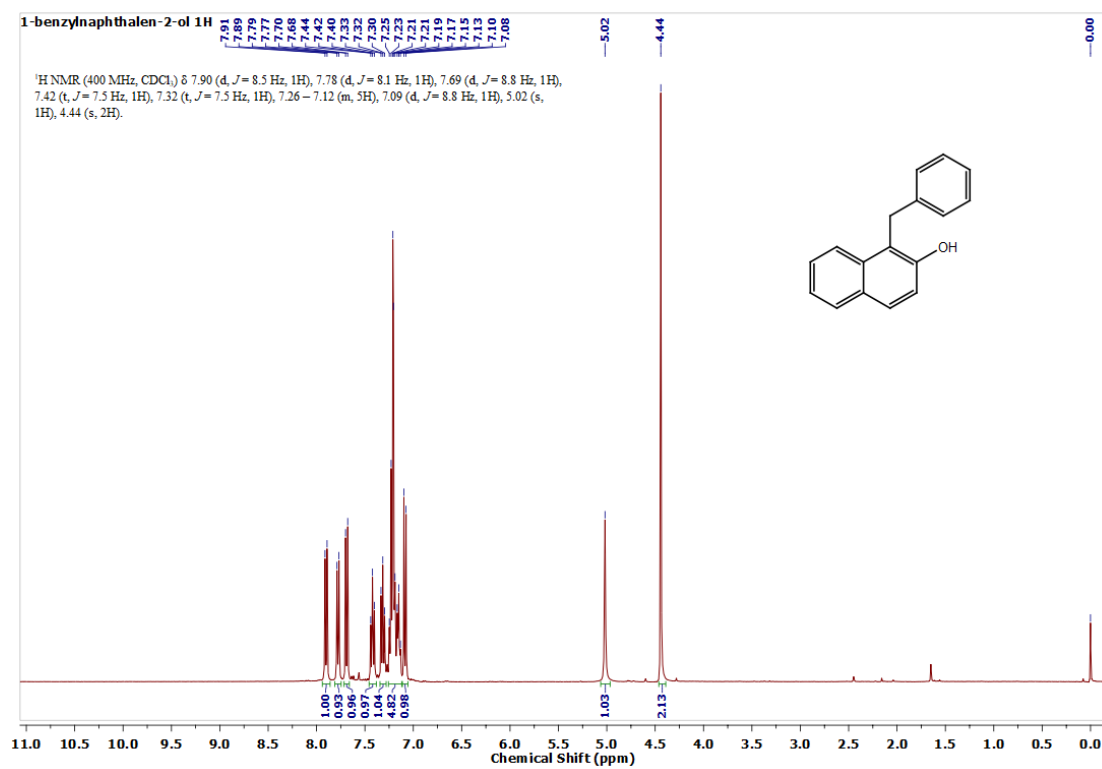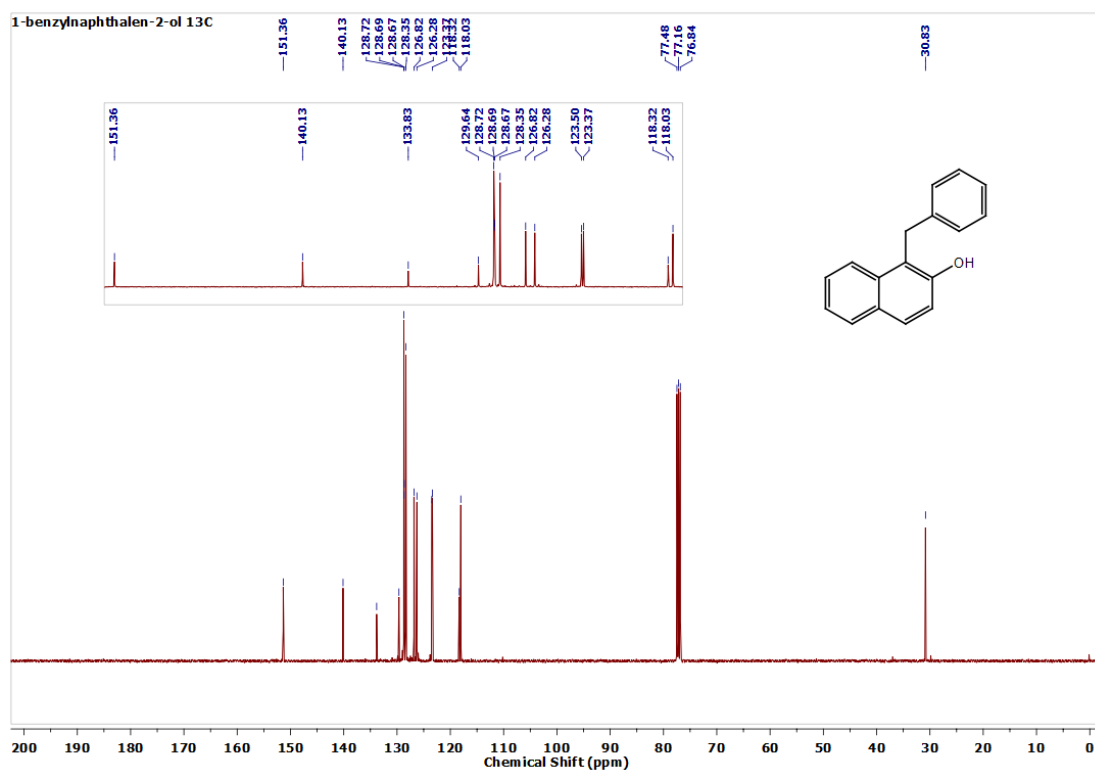

# Electronic Supplementary Information

## Compound 3b: 1-(4-methoxybenzyl)naphthalen-2-ol

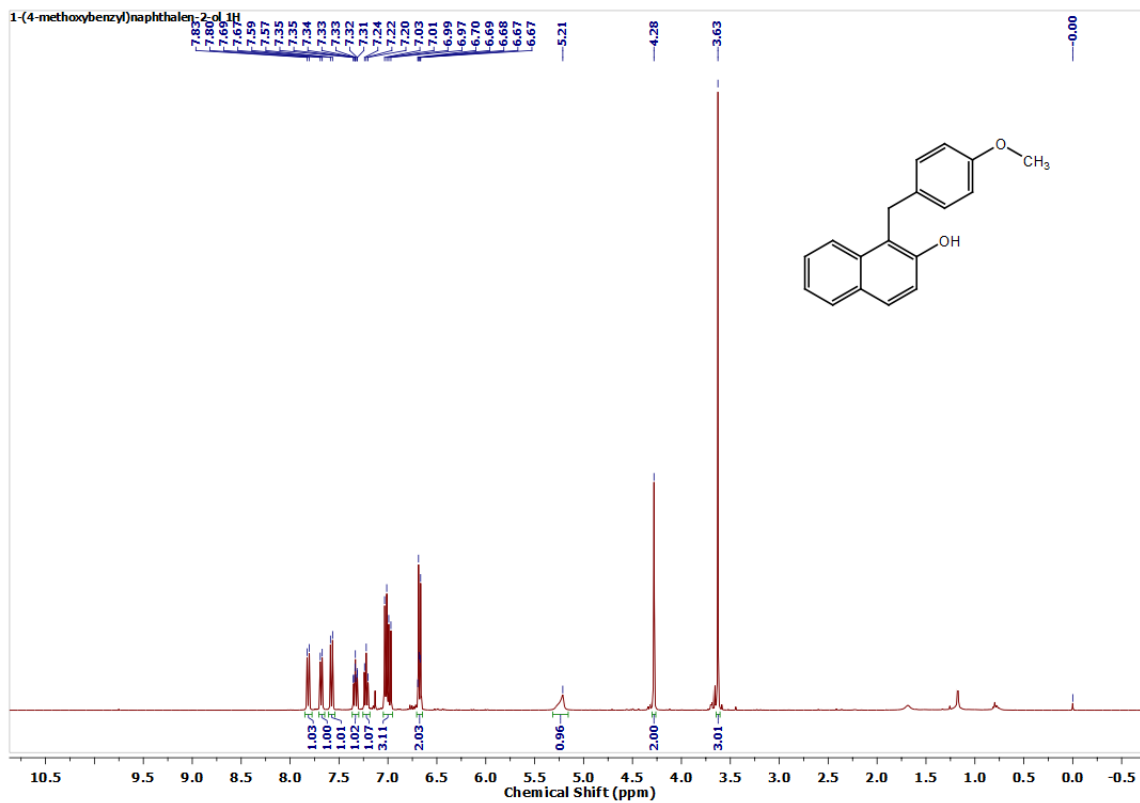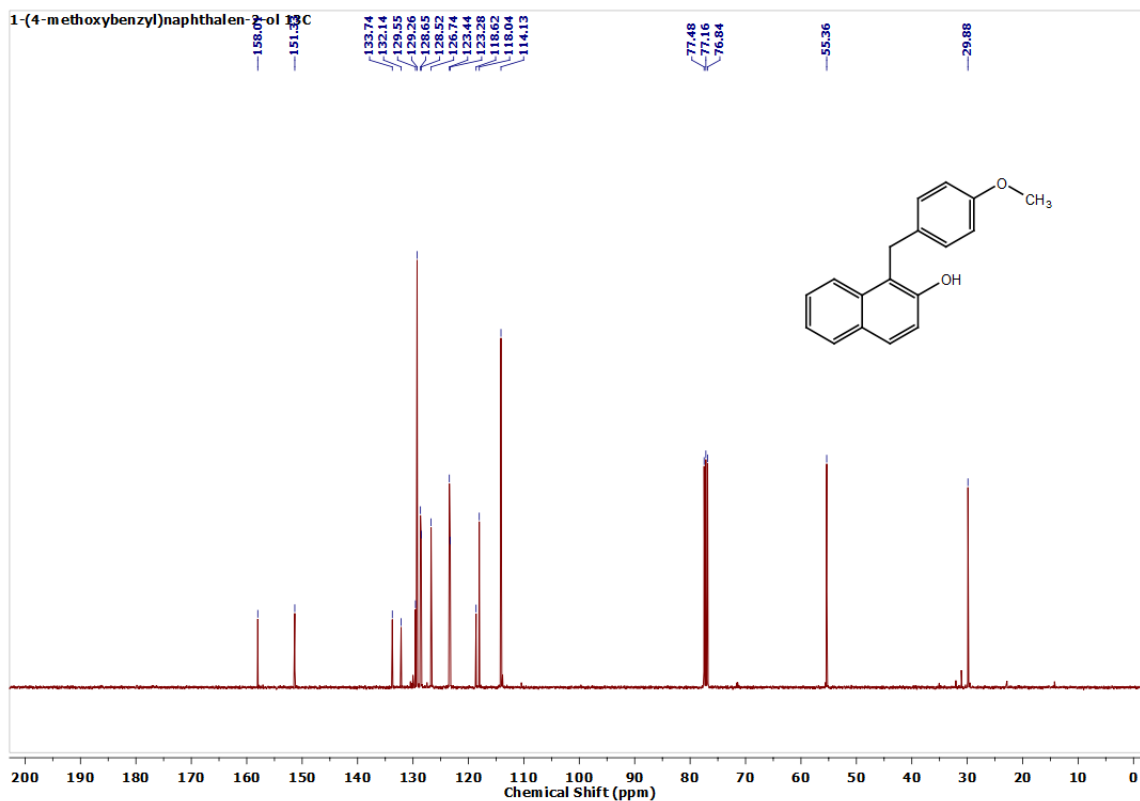

# Electronic Supplementary Information

## Compound 3c: 1-(4-methylbenzyl)naphthalen-2-ol

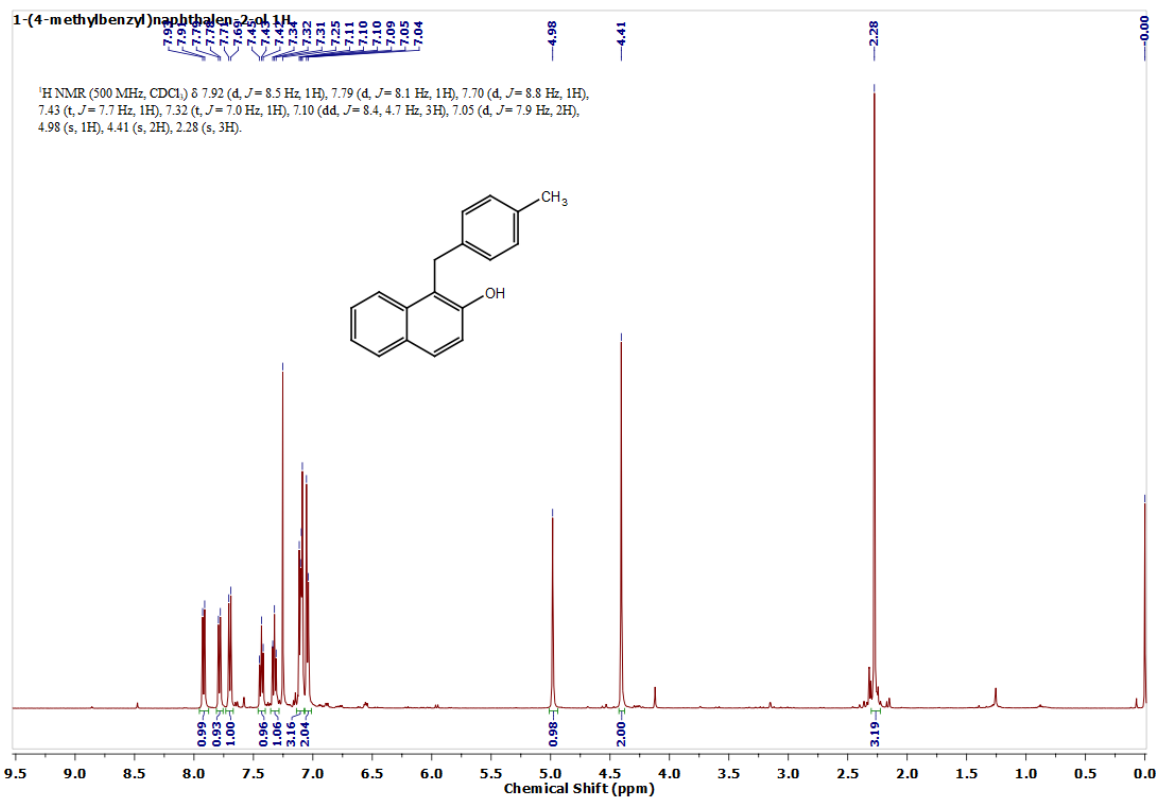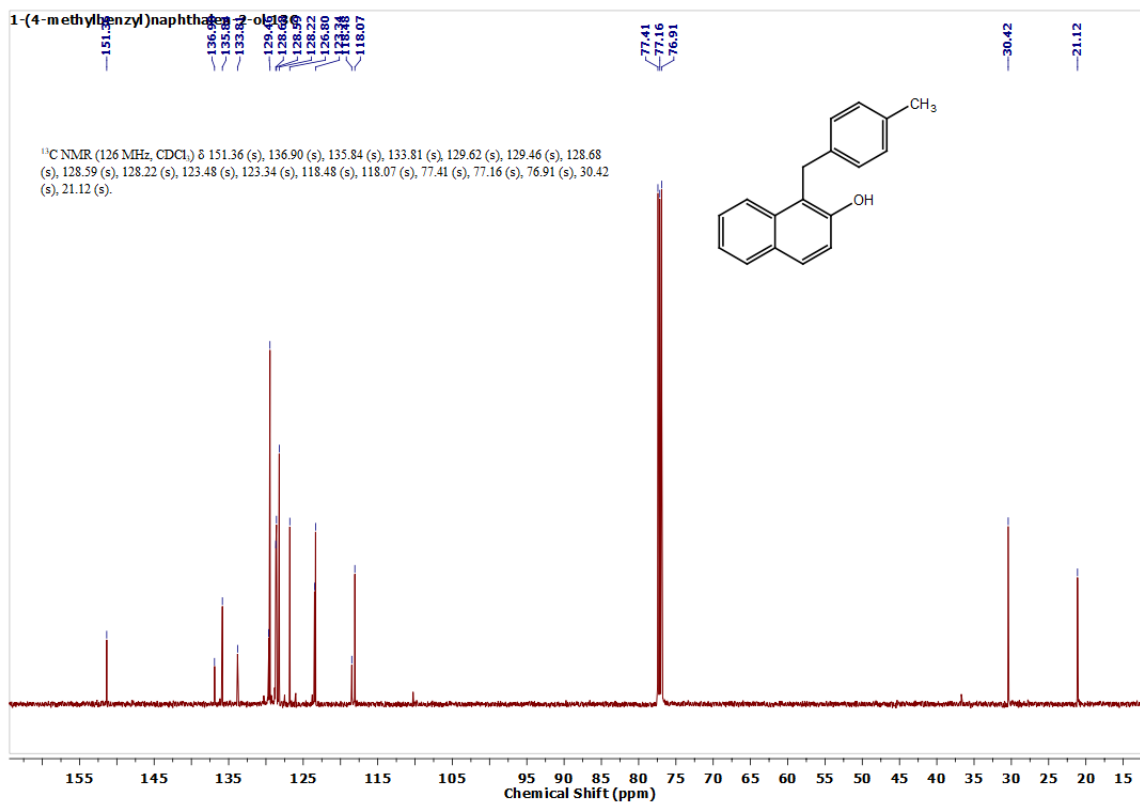

# Electronic Supplementary Information

## Compound 3d: 1-(4-isopropylbenzyl)naphthalen-2-ol

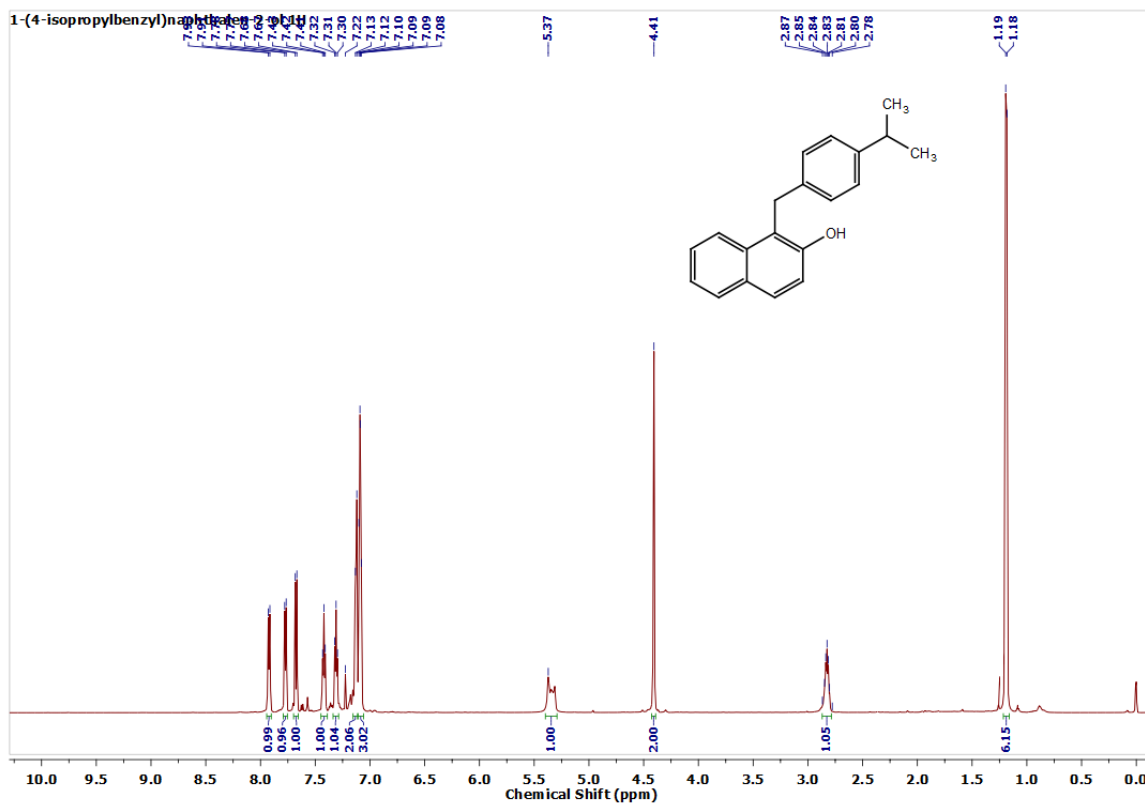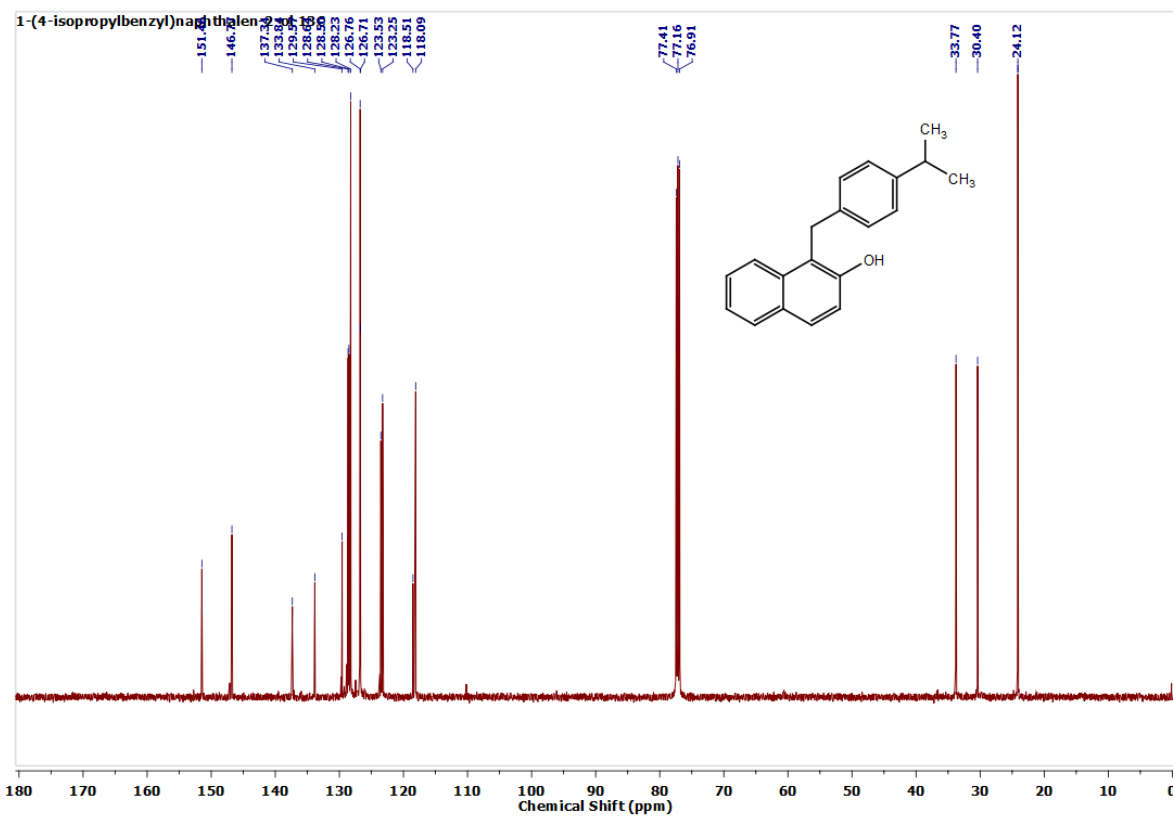



# Electronic Supplementary Information

## Compound 3e: 1-(2-hydroxybenzyl)naphthalen-2-ol

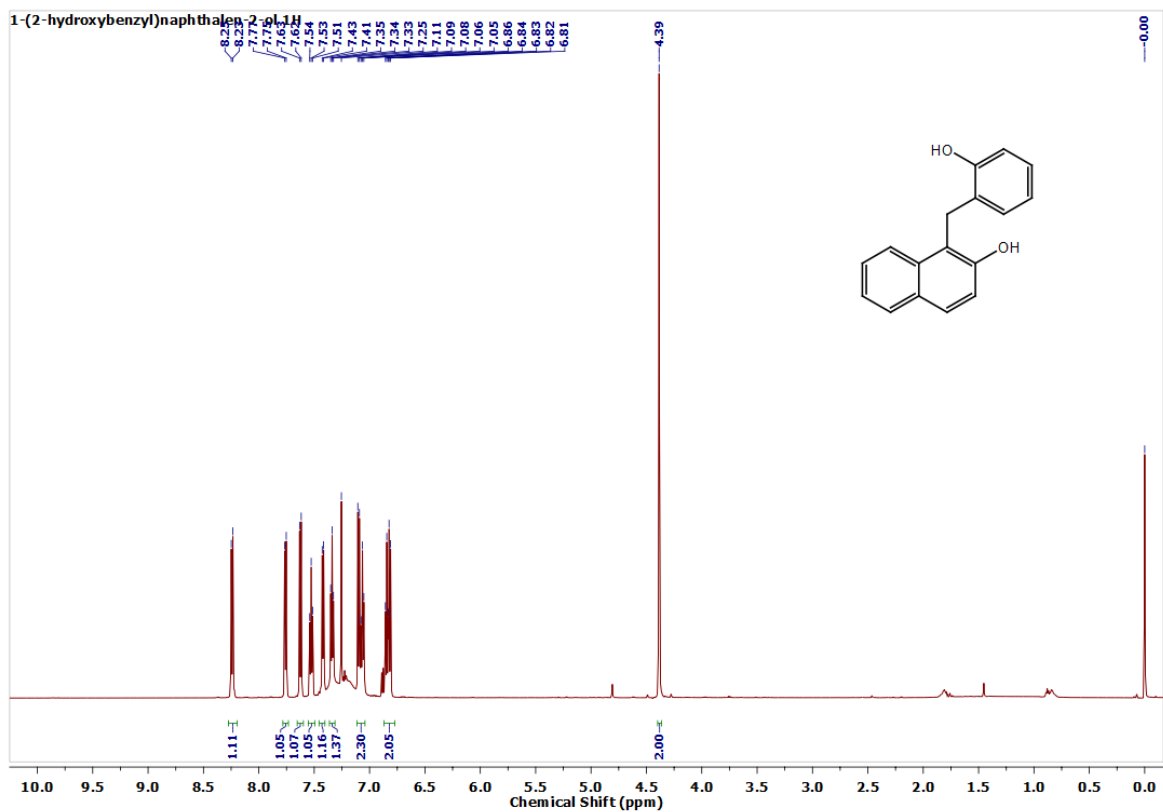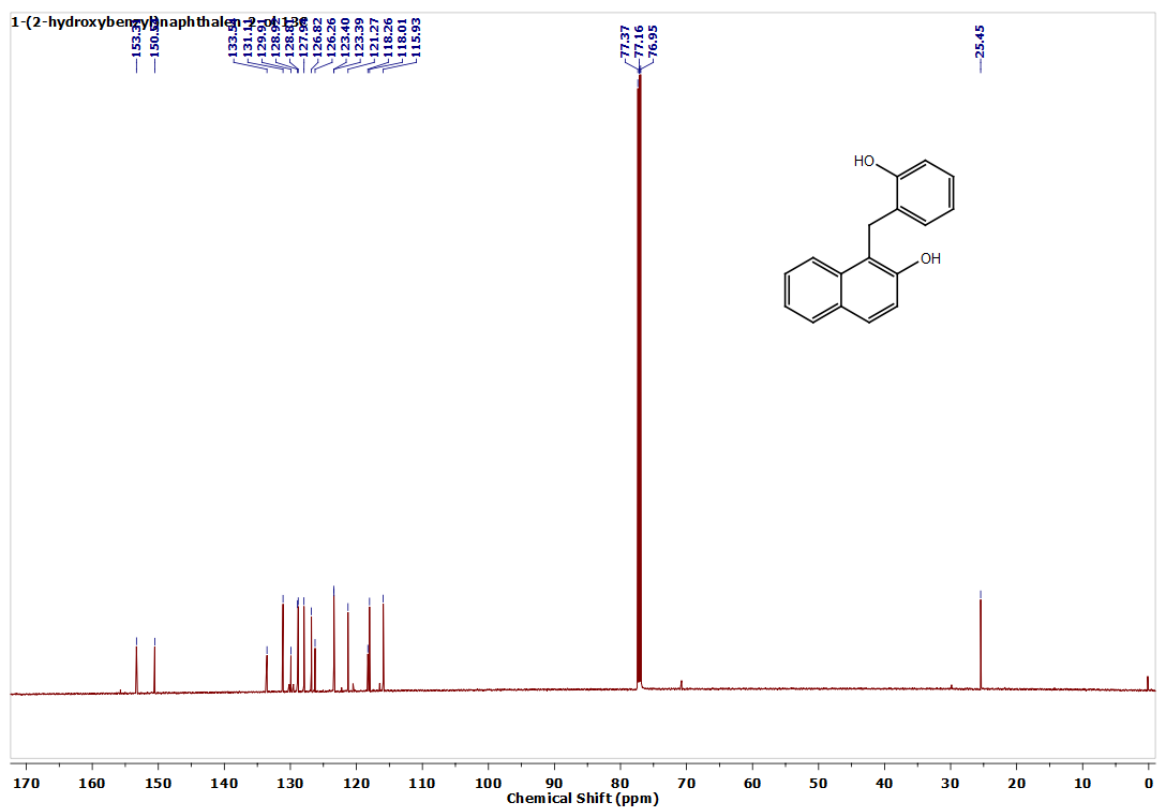

# Electronic Supplementary Information

## Compound 3f: 1-(thiophen-2-ylmethyl)naphthalen-2-ol

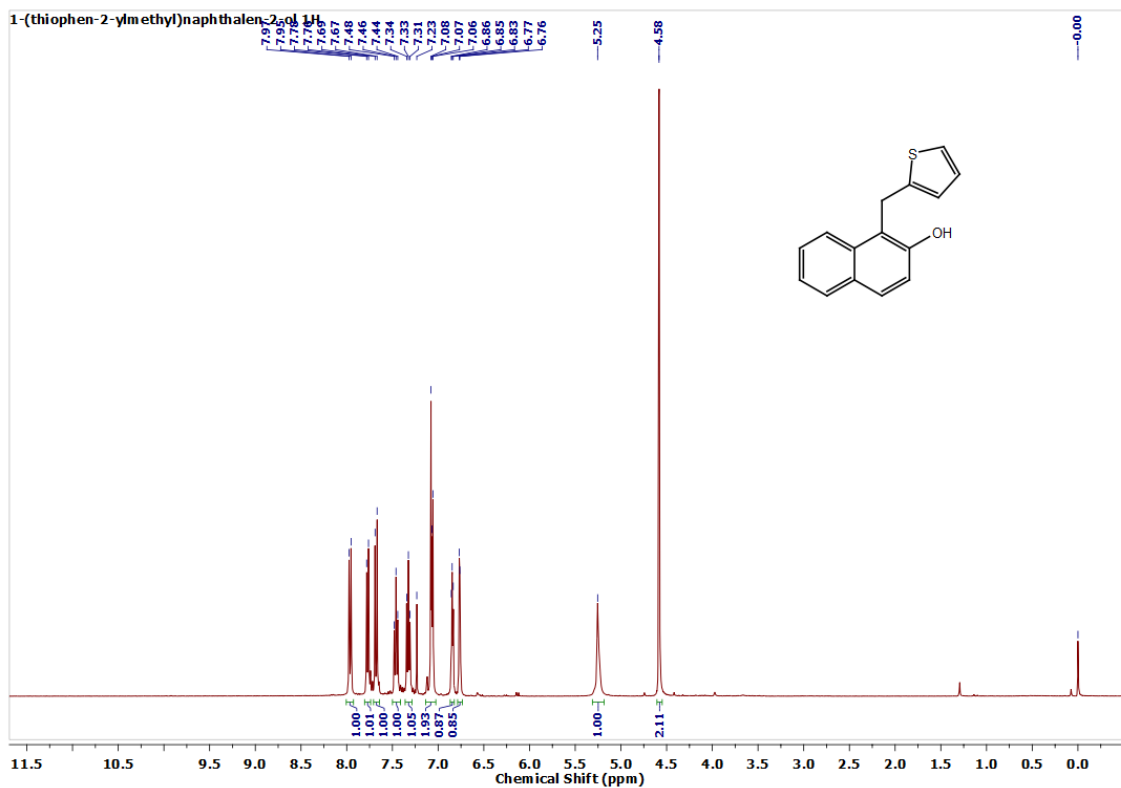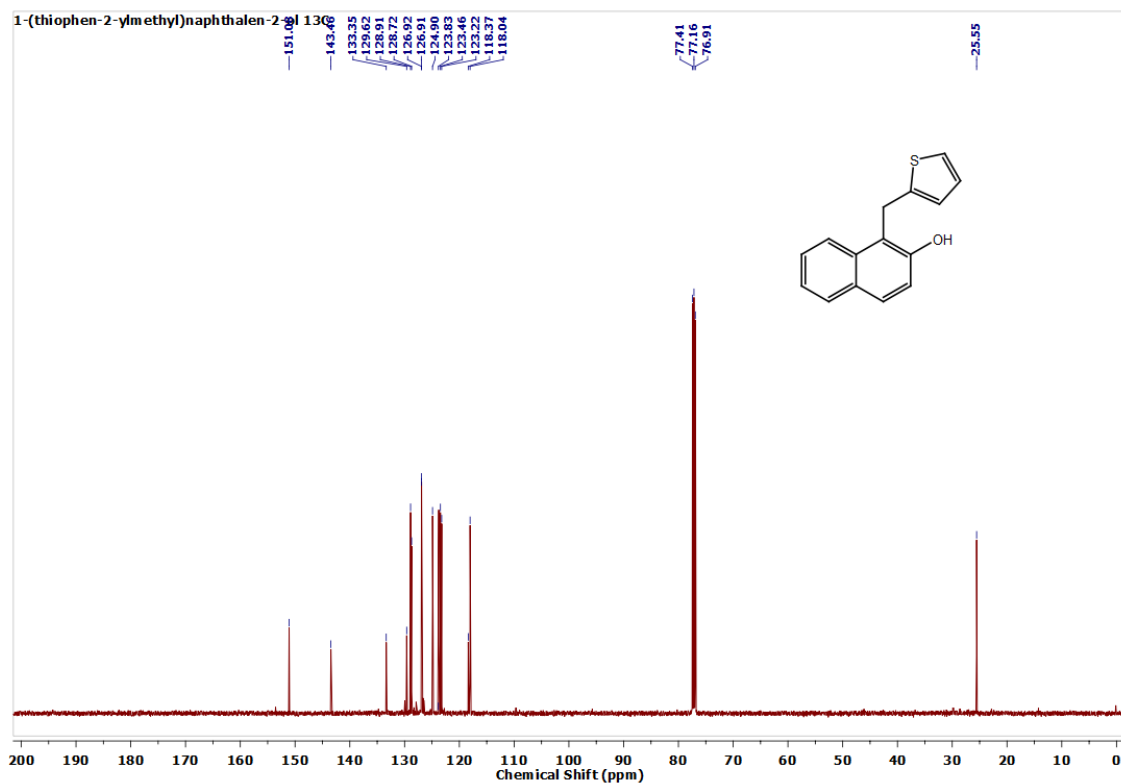

# Electronic Supplementary Information

## Compound 3g: 1-benzyl-naphthalene-2,7-diol

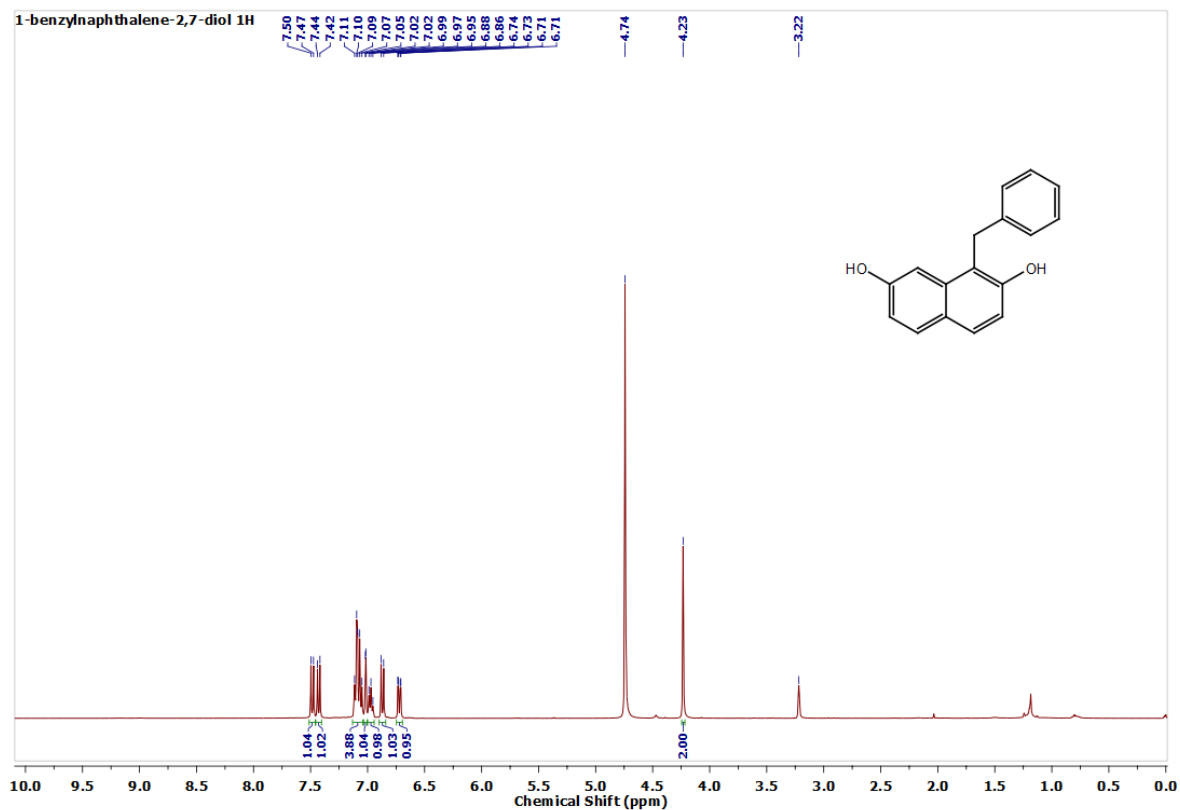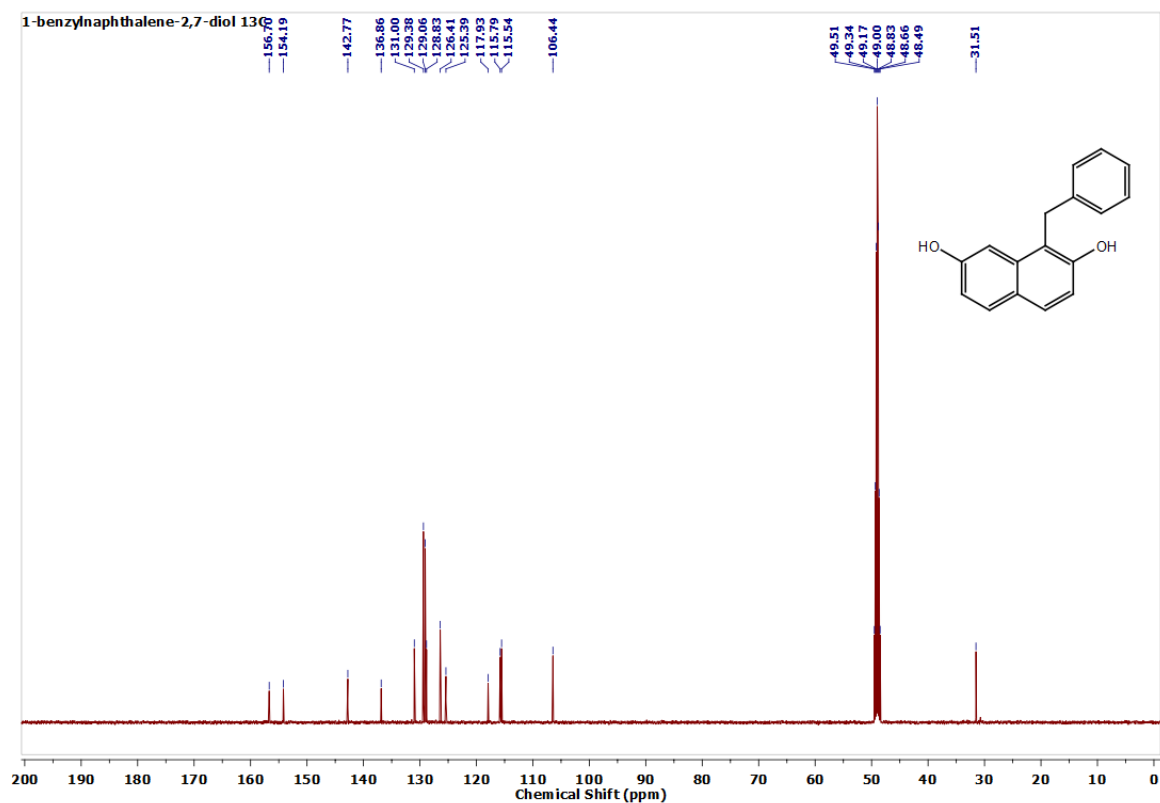

# Electronic Supplementary Information

## Compound 3h: 1-(4-methoxybenzyl)naphthalene-2,7-diol

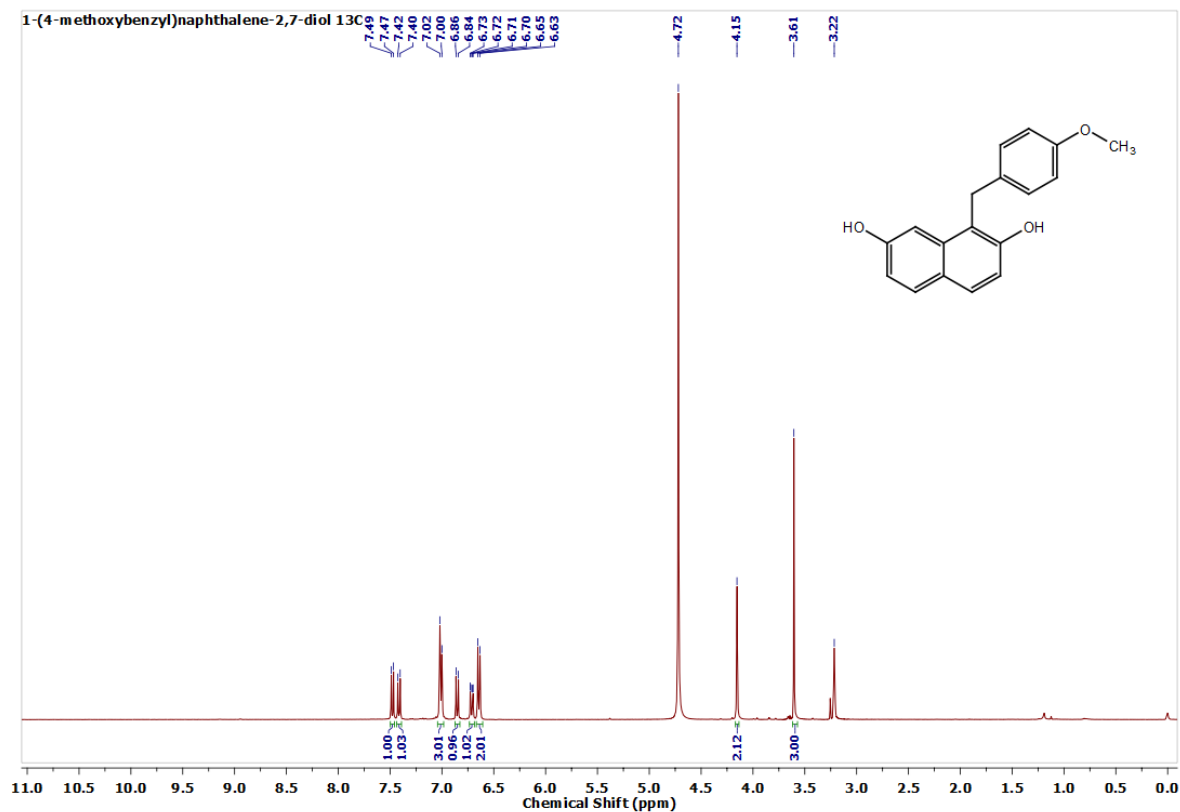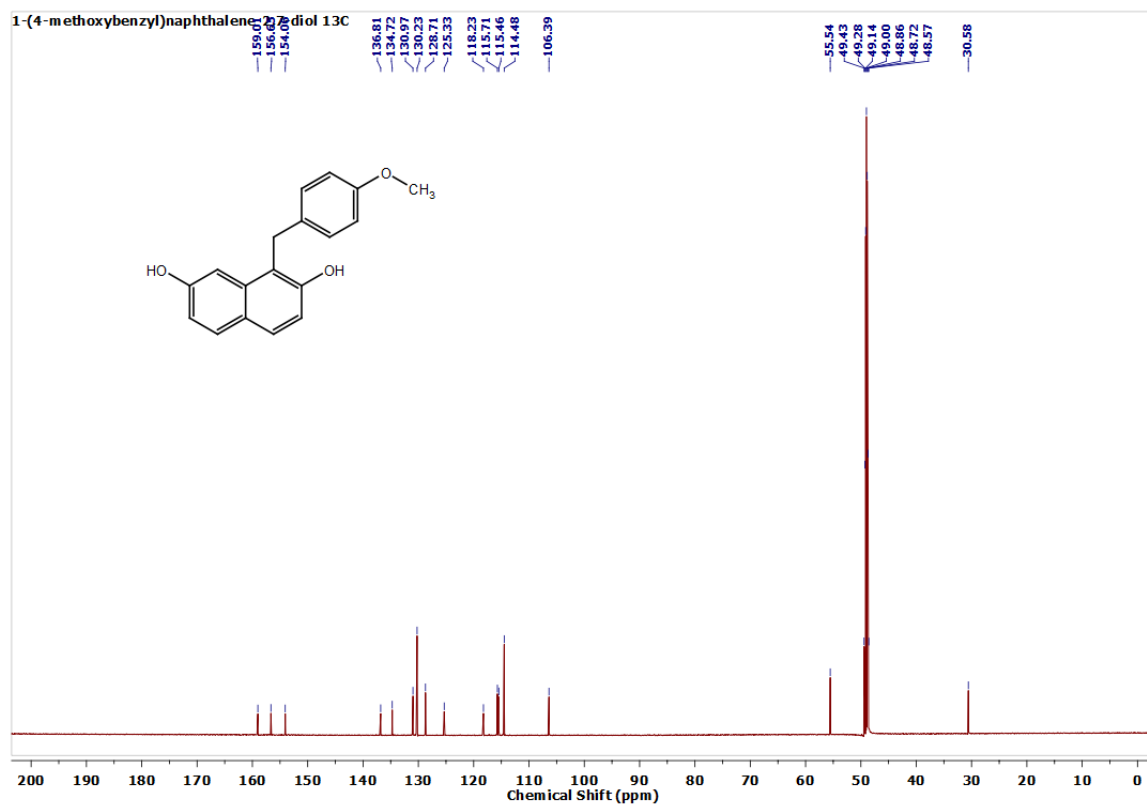

# Electronic Supplementary Information

## Compound 3i: 1-(4-methylbenzyl)naphthalene-2,7-diol

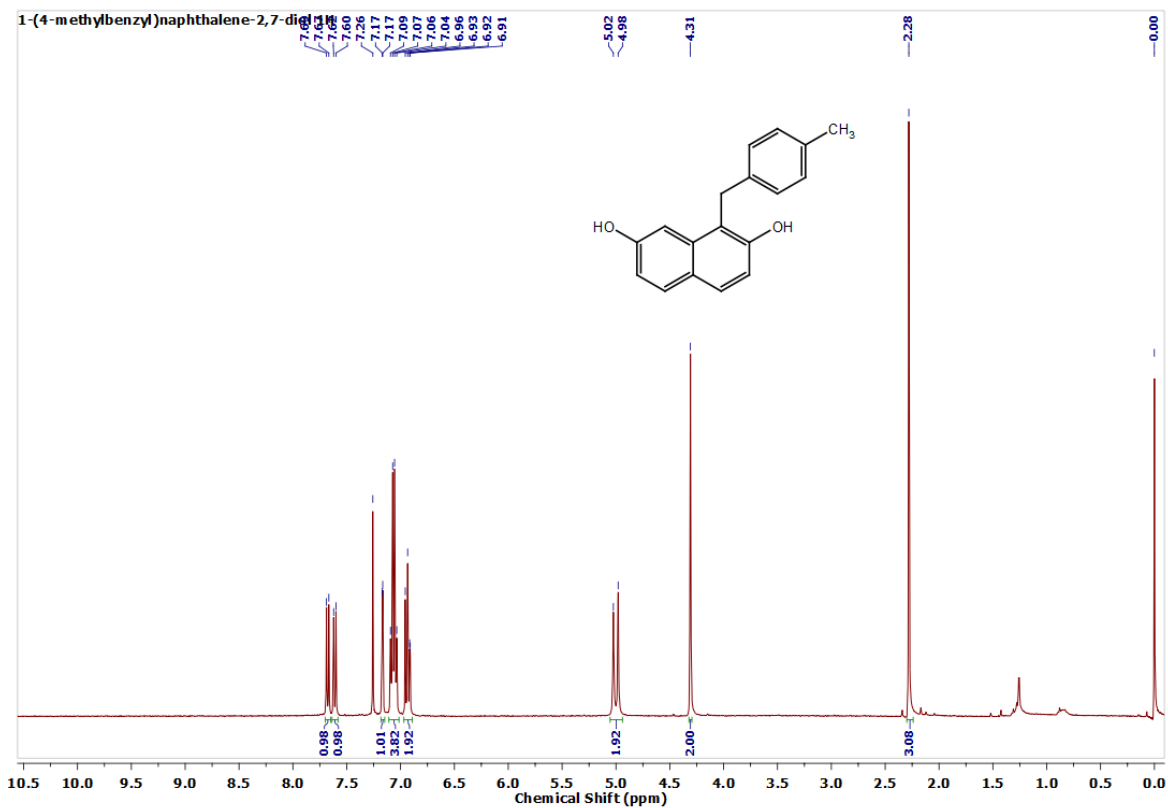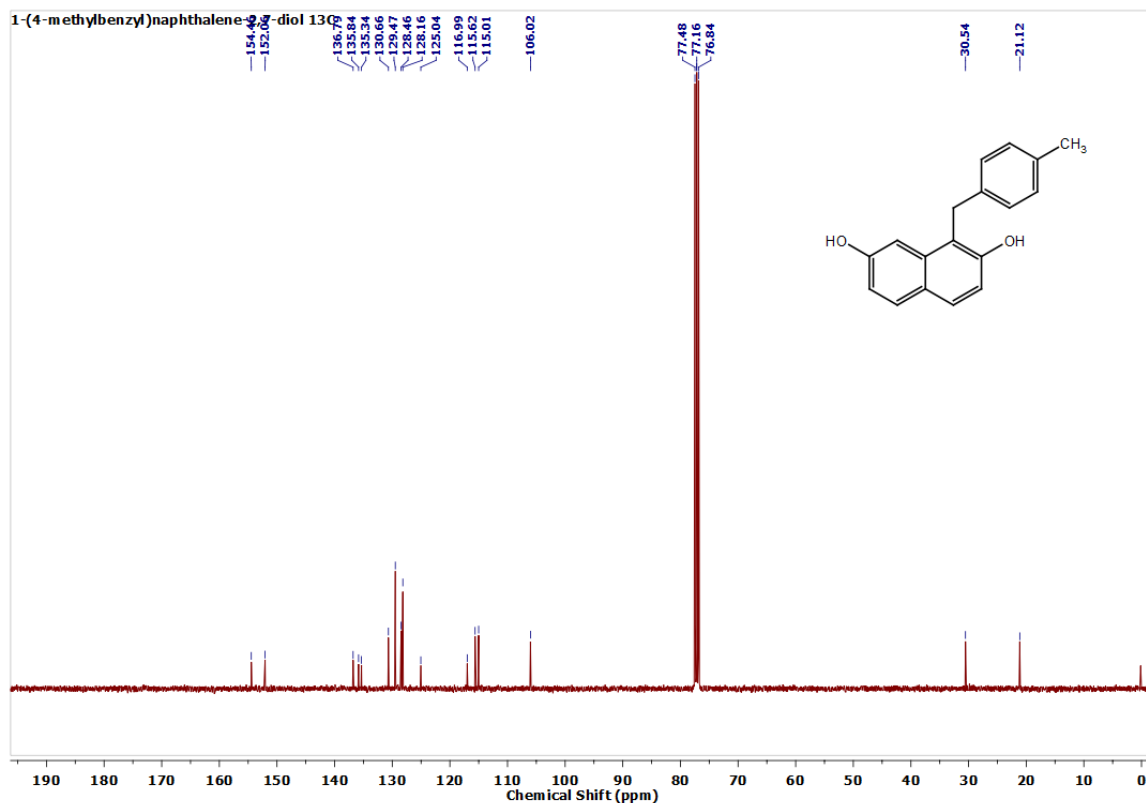

# Electronic Supplementary Information

## Compound 3j: 1-(4-isopropylbenzyl)naphthalene-2,7-diol

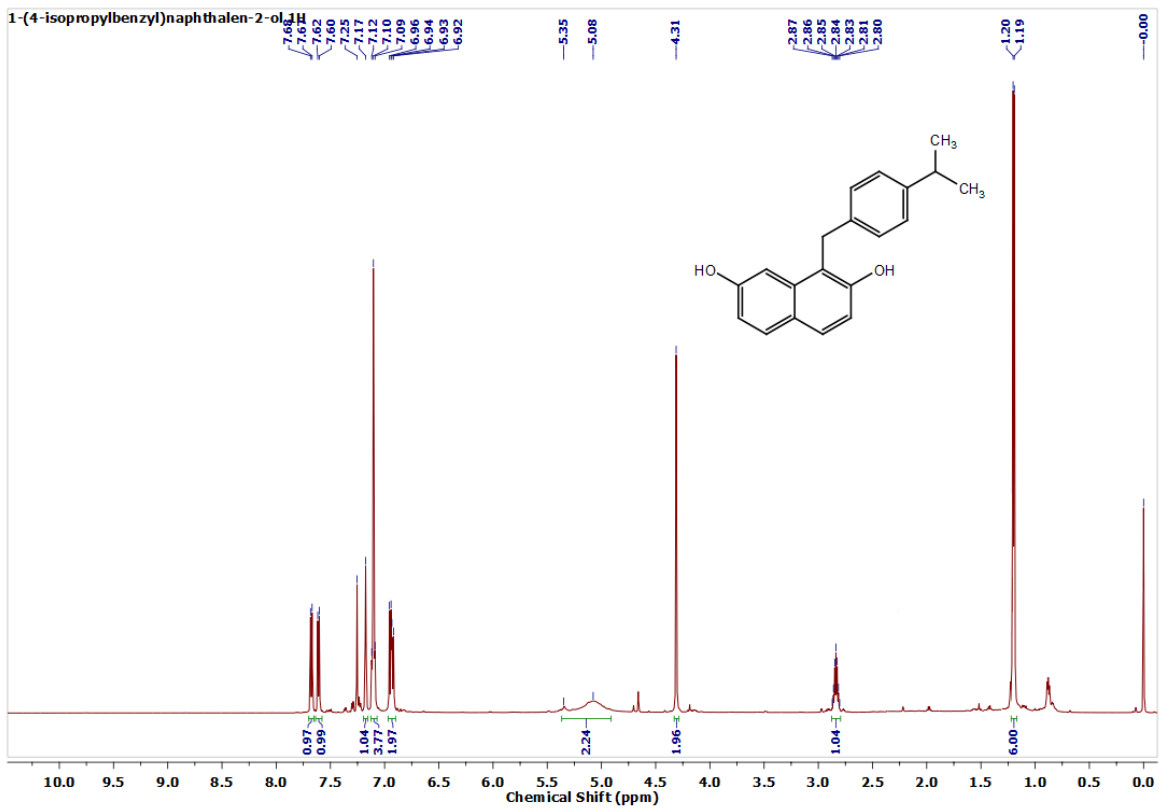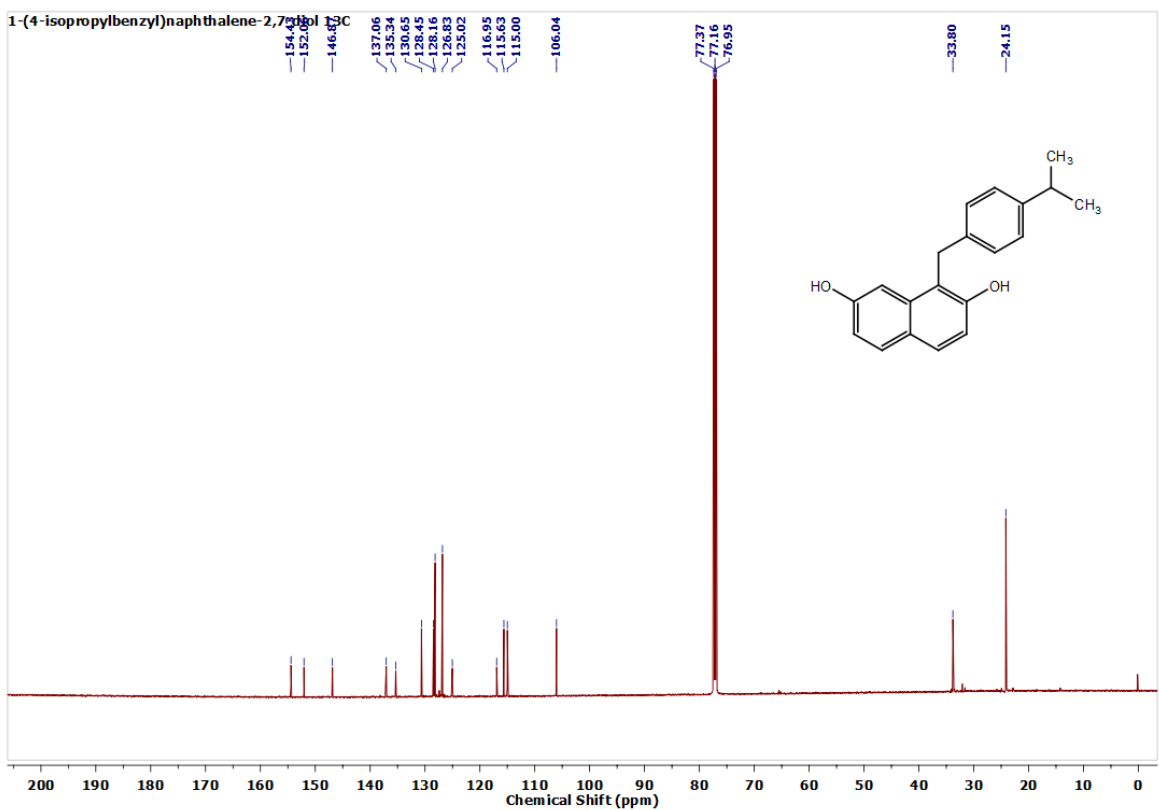

# Electronic Supplementary Information

## Compound 3k: 1-(thiophen-2-ylmethyl)naphthalene-2,7-diol

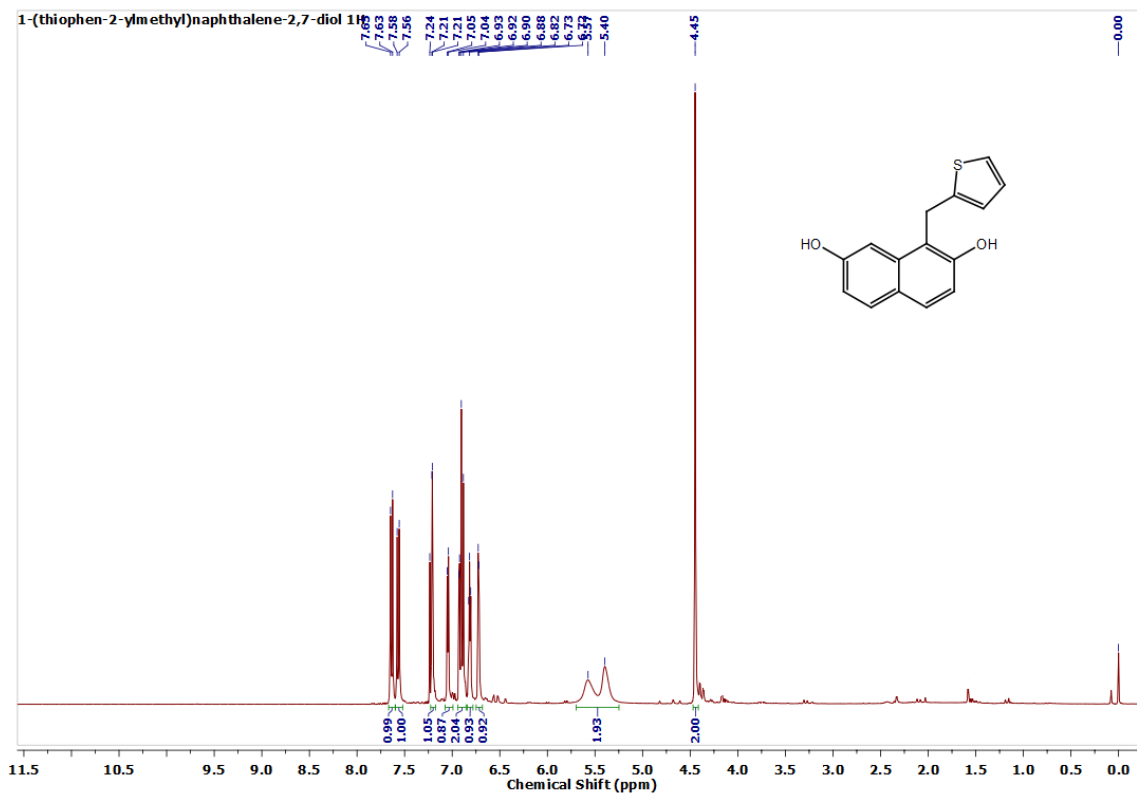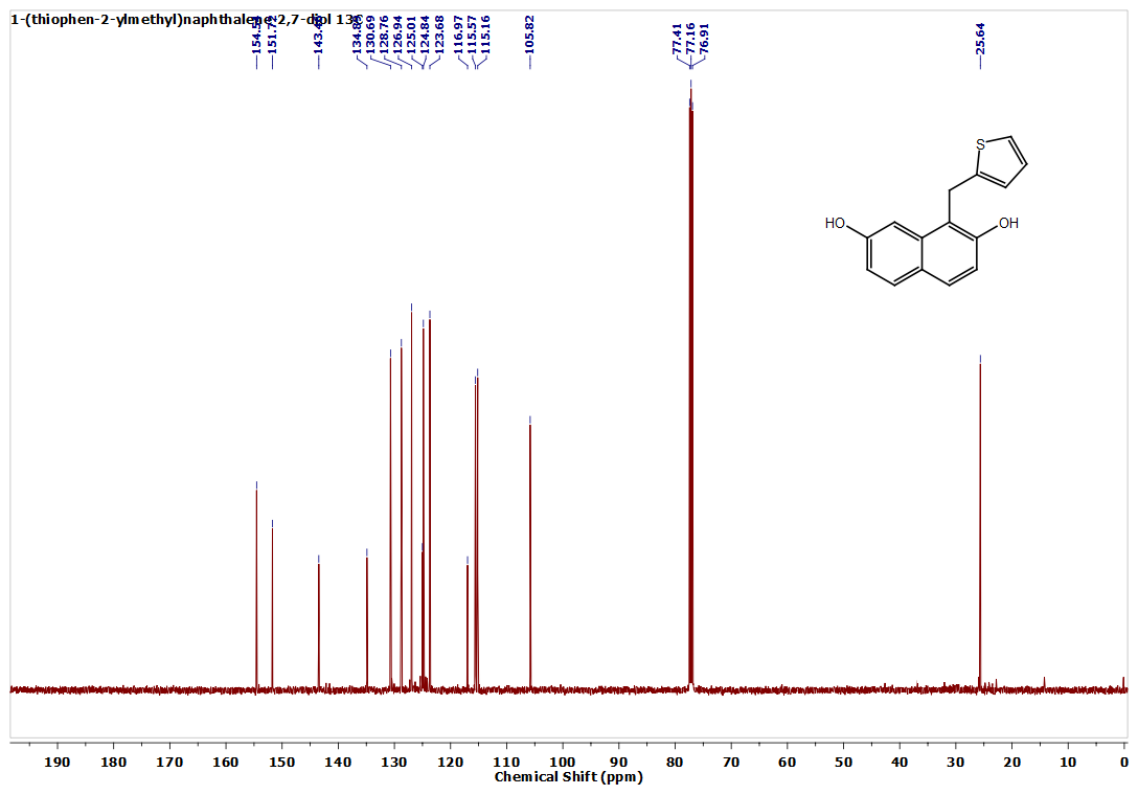

# Electronic Supplementary Information

## Compound 3l: 1-(4-chlorobenzyl)naphthalene-2,7-diol

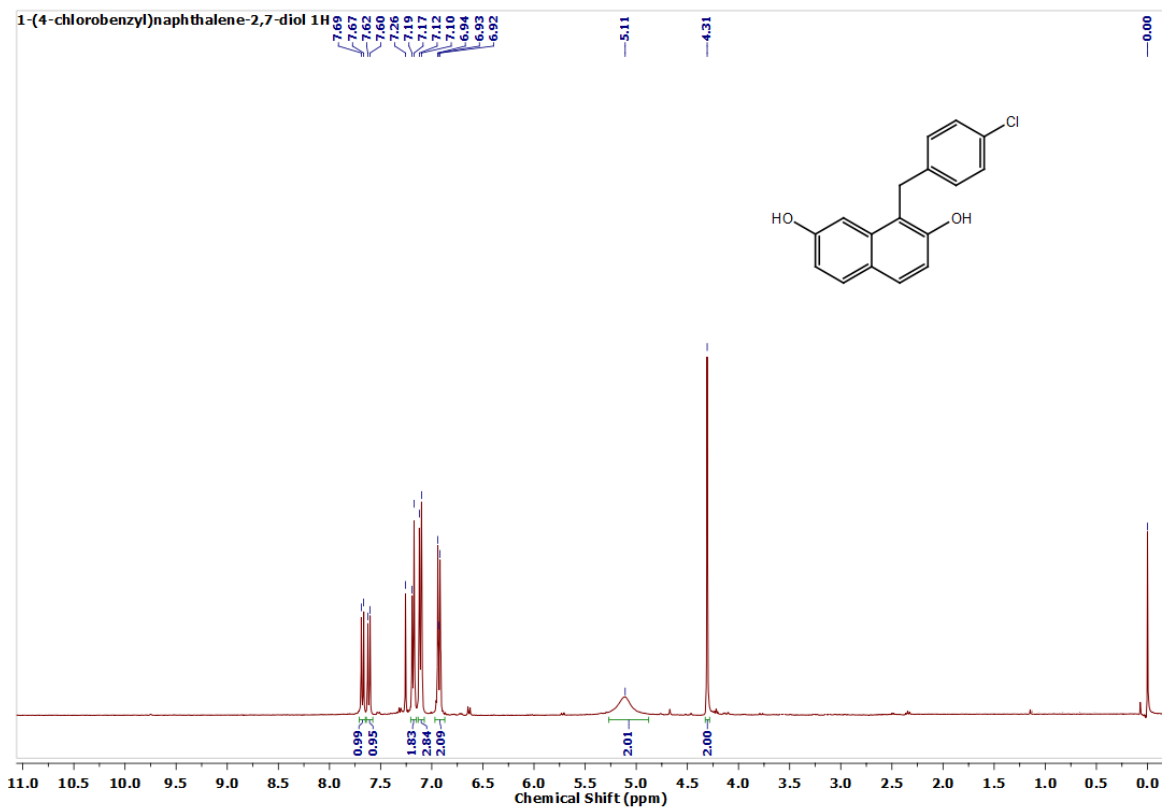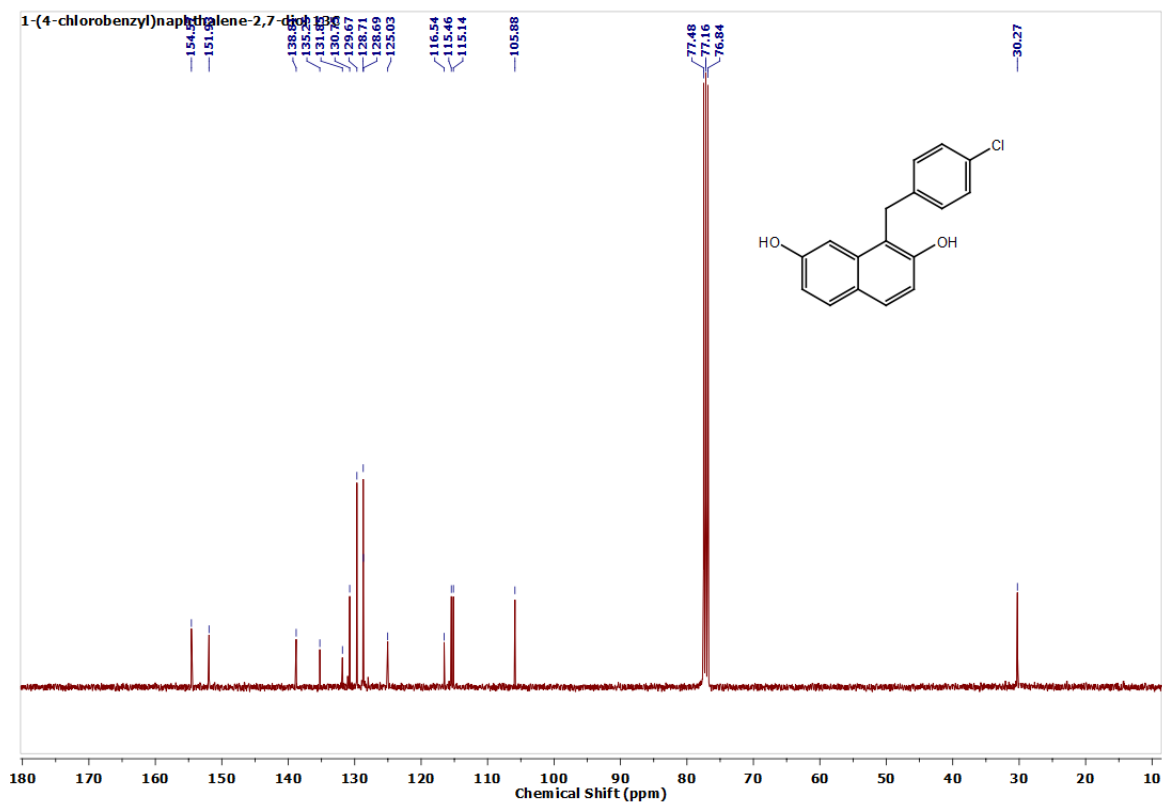



# Electronic Supplementary Information

## Compound 3m: 1-benzyl-7-methoxynaphthalen-2-ol

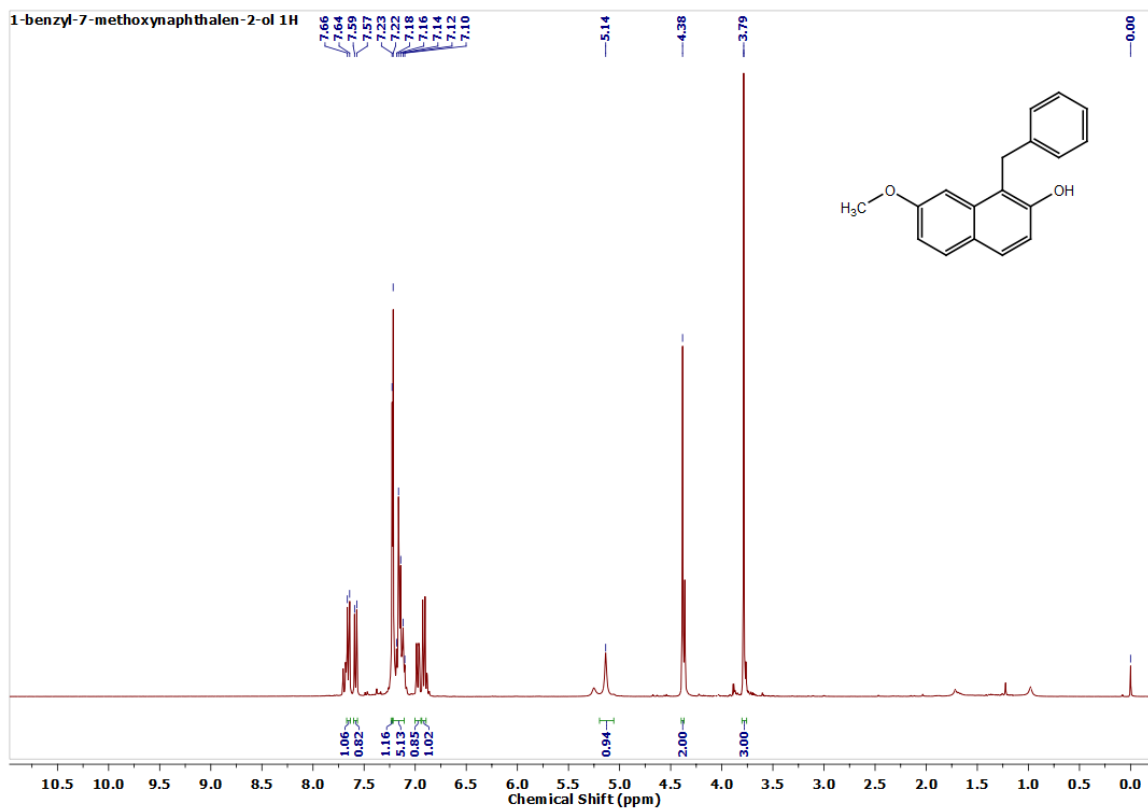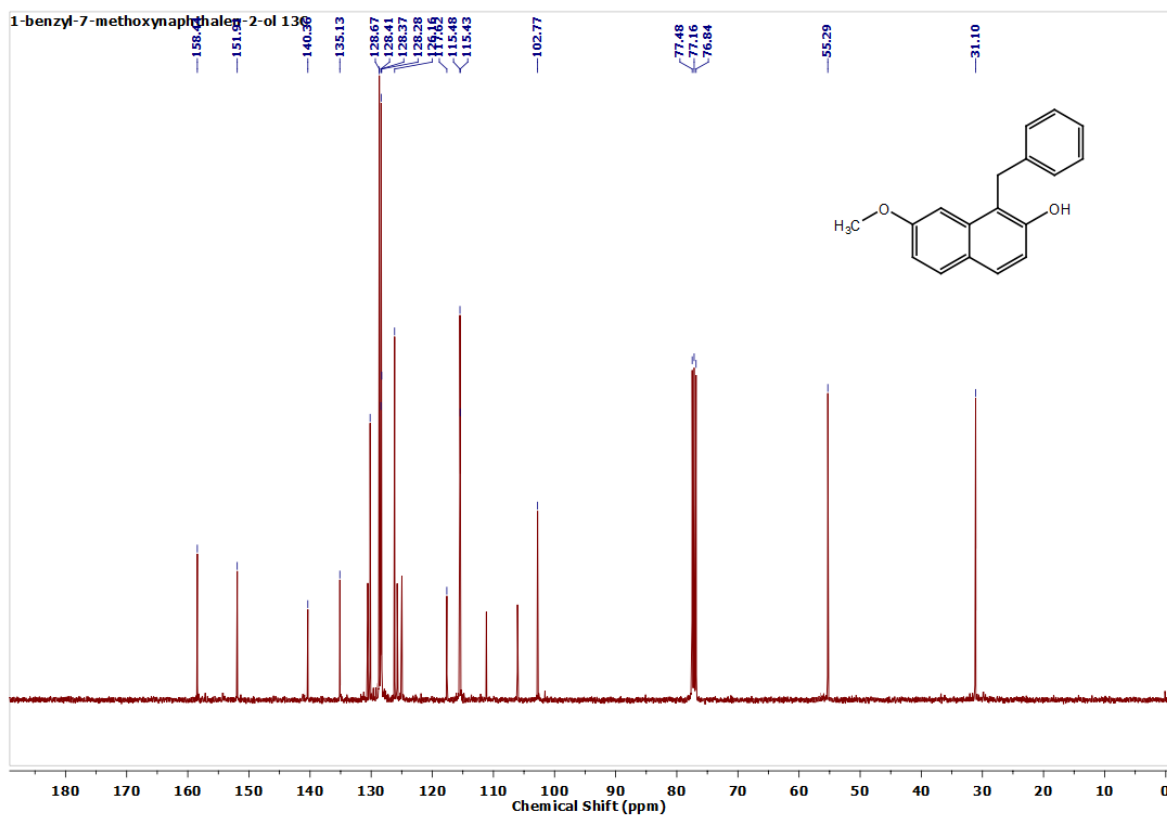

# Electronic Supplementary Information

## Compound 3n: 7-methoxy-1-(4-methoxybenzyl)naphthalen-2-ol

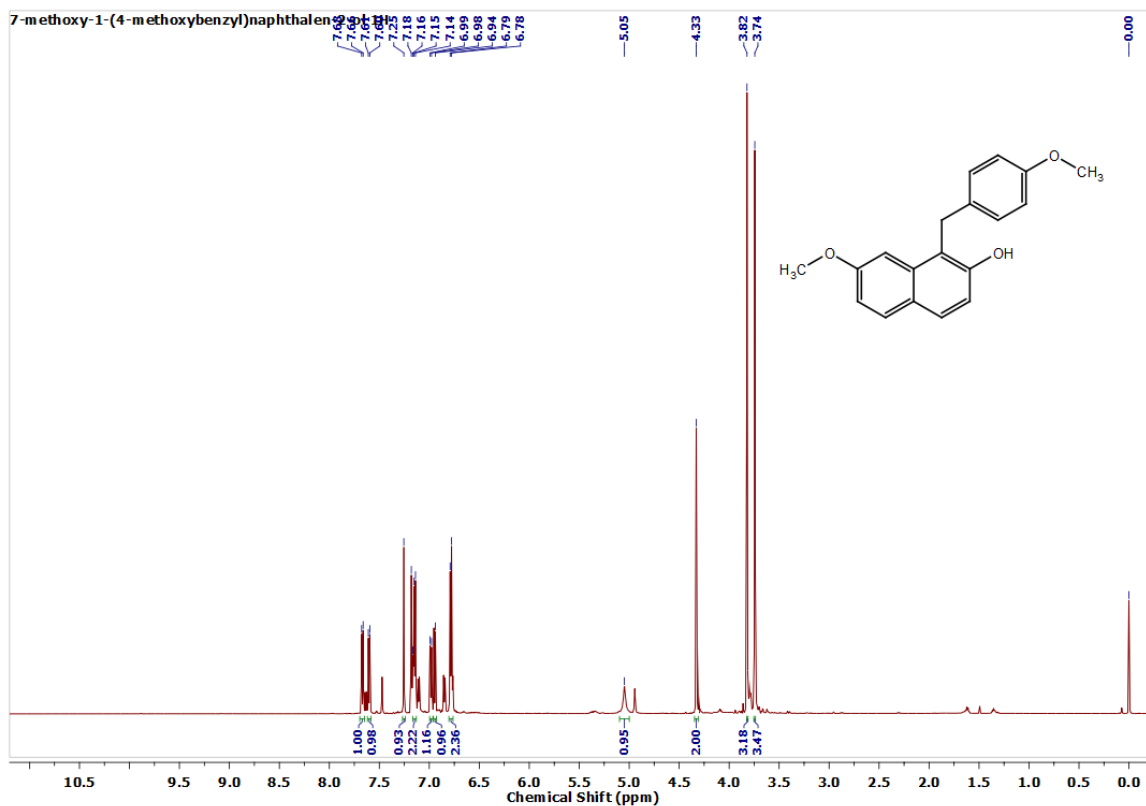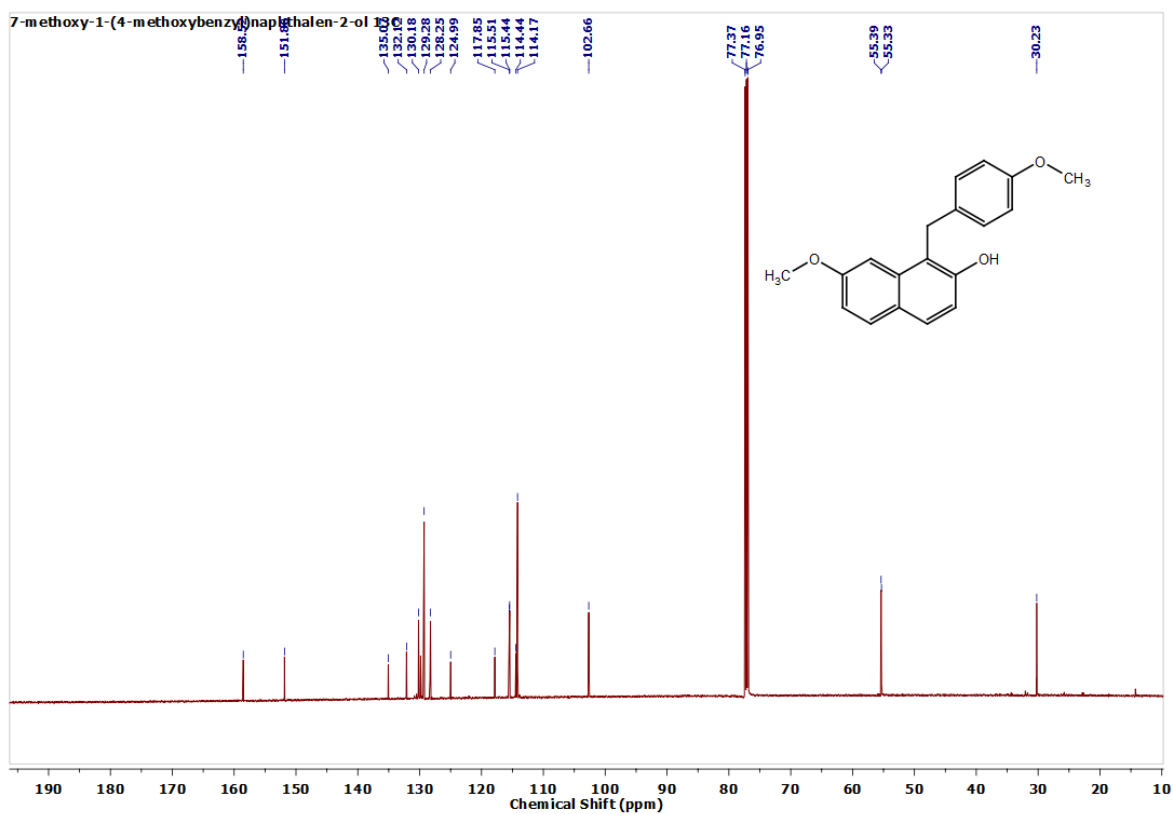

# Electronic Supplementary Information

## Compound 3o: 7-methoxy-1-(4-methylbenzyl)naphthalen-2-ol

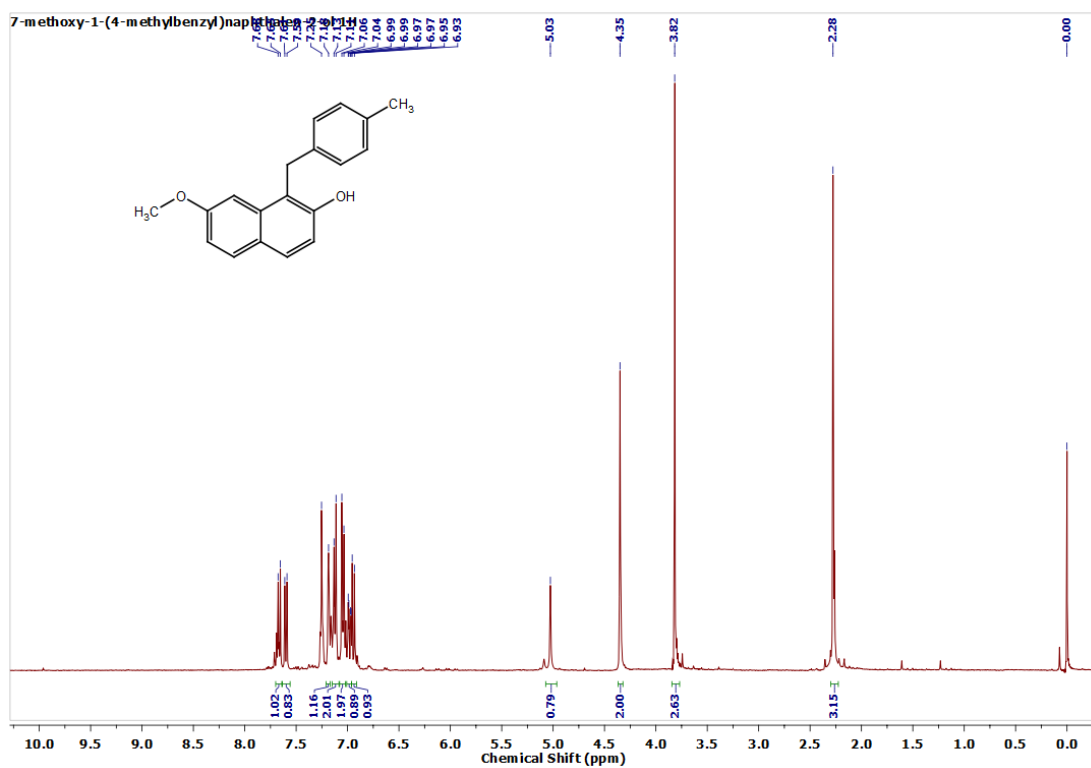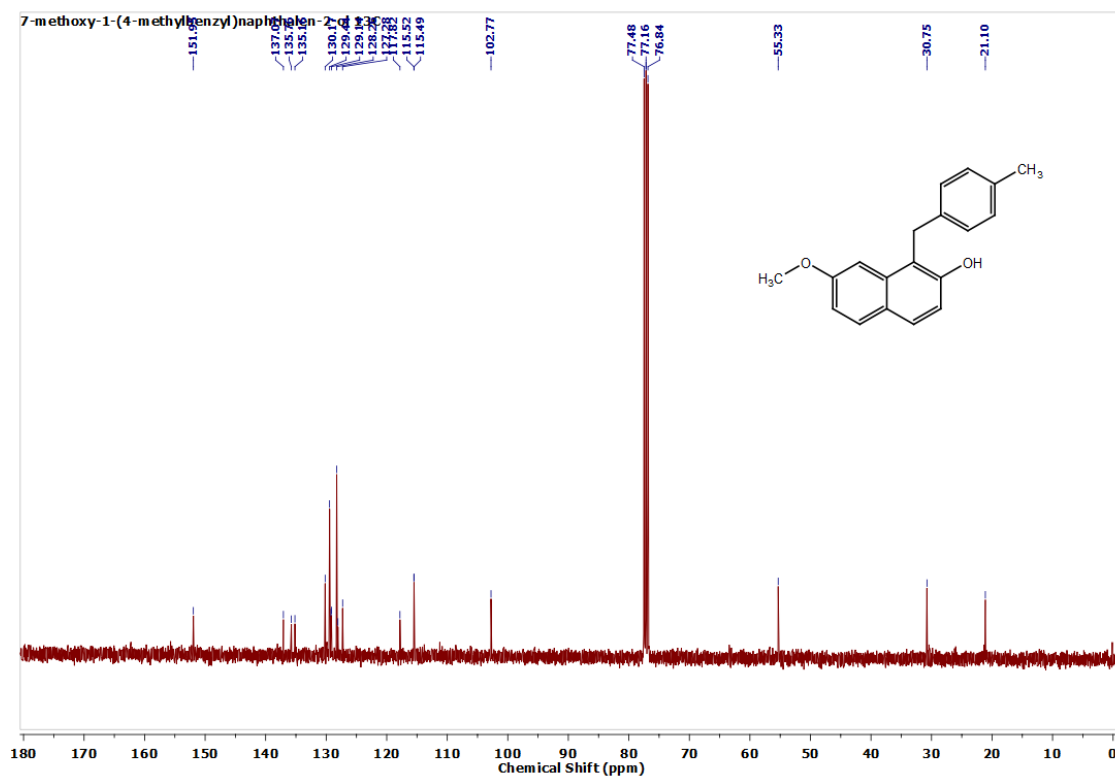

# Electronic Supplementary Information

## Compound 3p: 1-(4-isopropylbenzyl)-7-methoxynaphthalen-2-ol

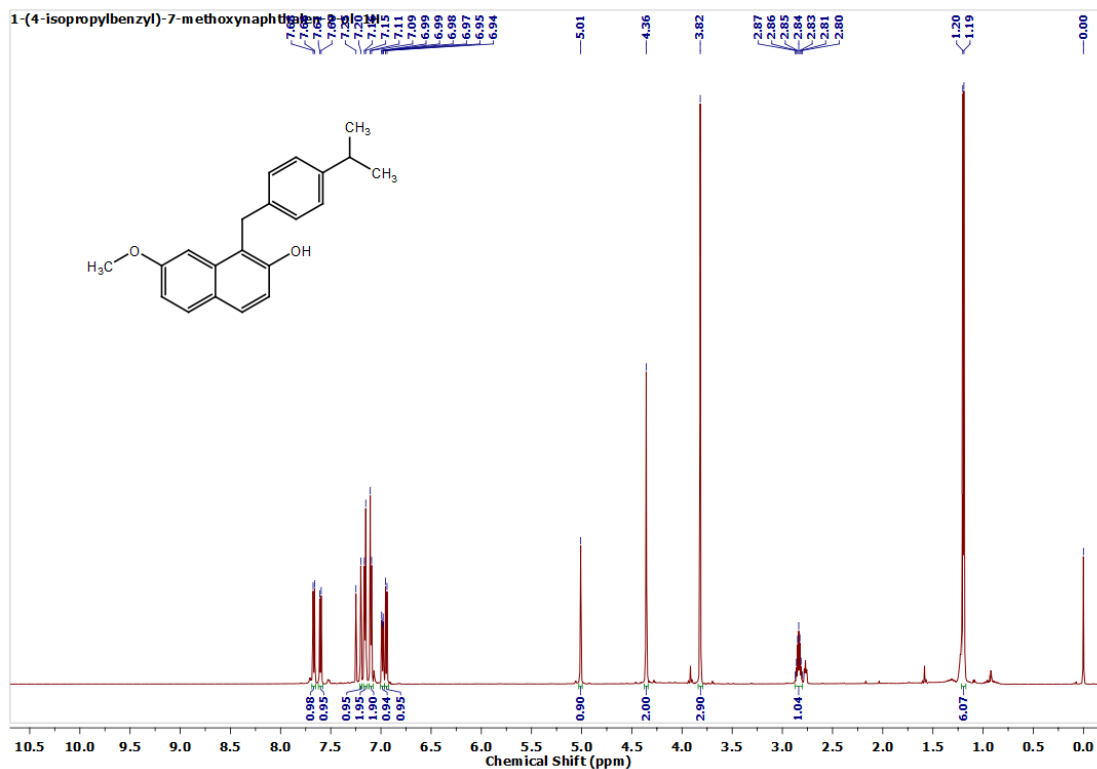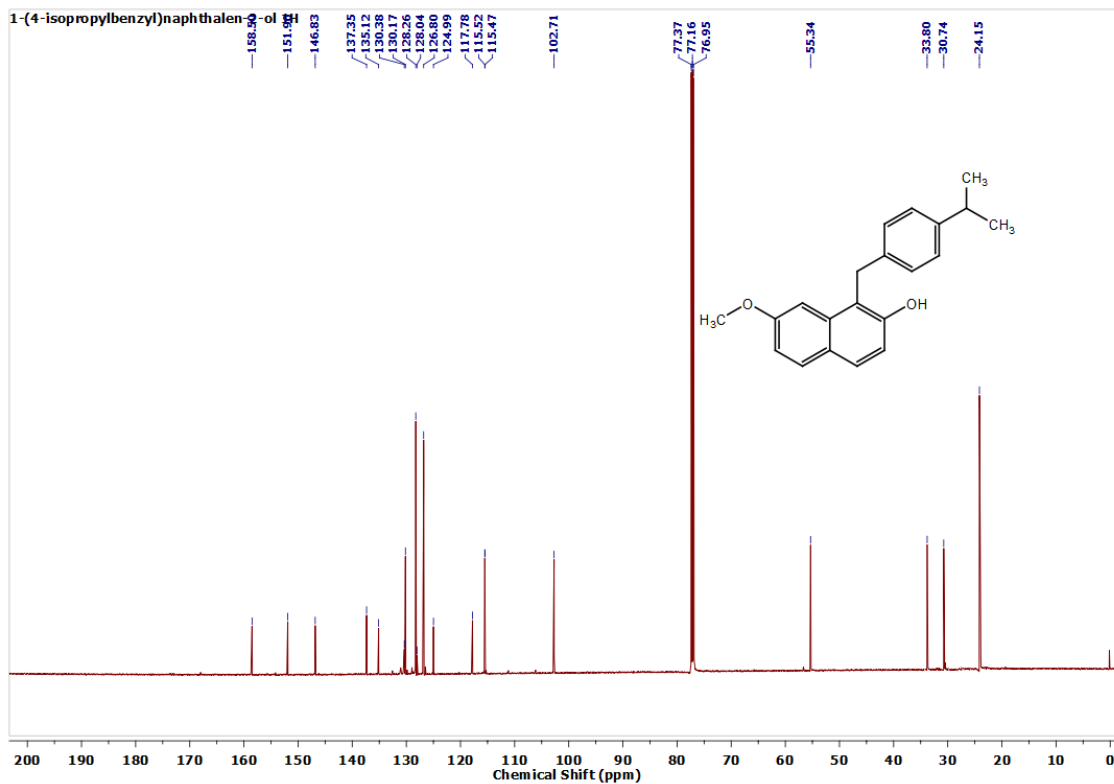

# Electronic Supplementary Information

## Compound 3q: 1-(2-hydroxybenzyl)-7-methoxynaphthalen-2-ol

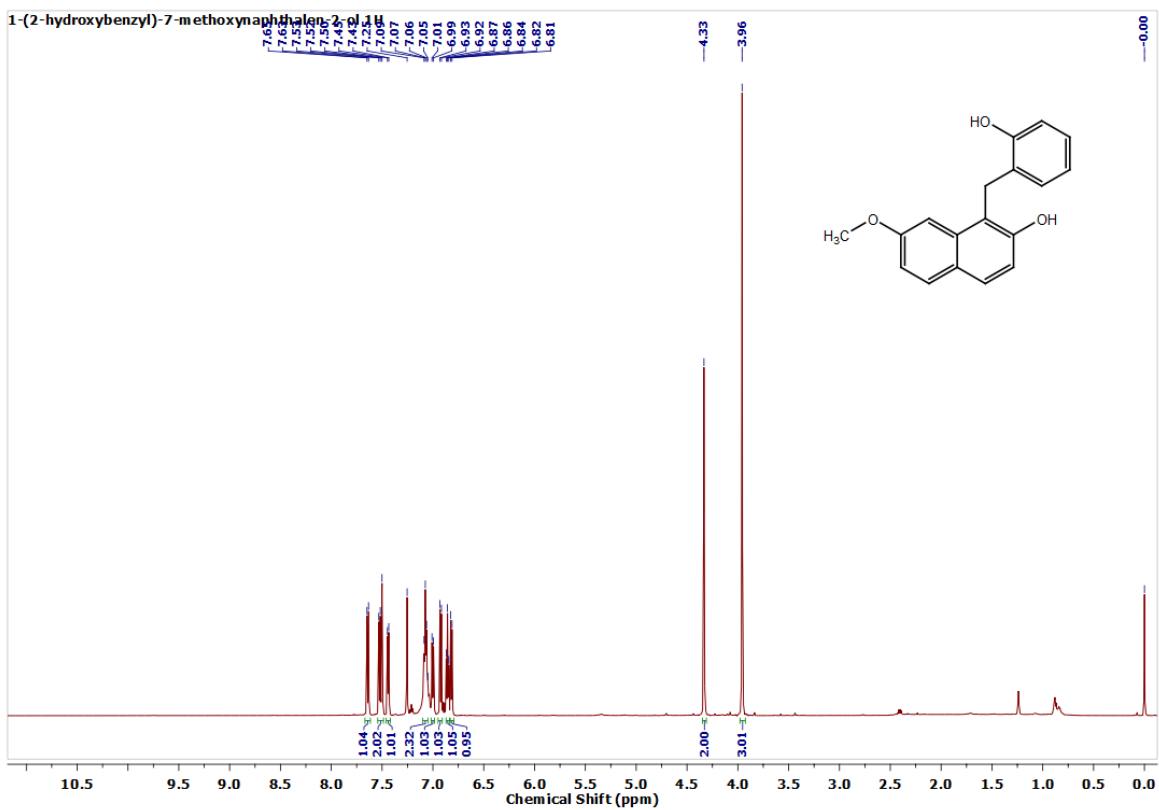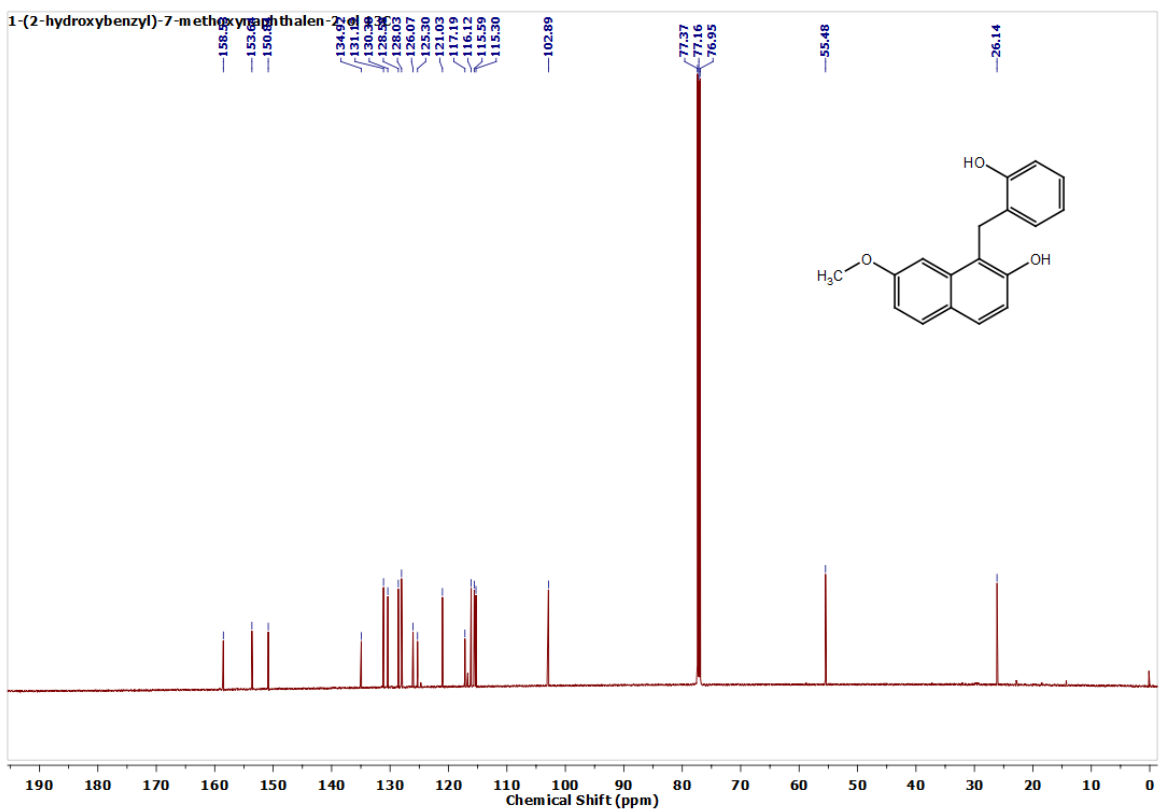

# Electronic Supplementary Information

## Compound 3r: 7-methoxy-1-(thiophen-2-ylmethyl)naphthalen-2-ol

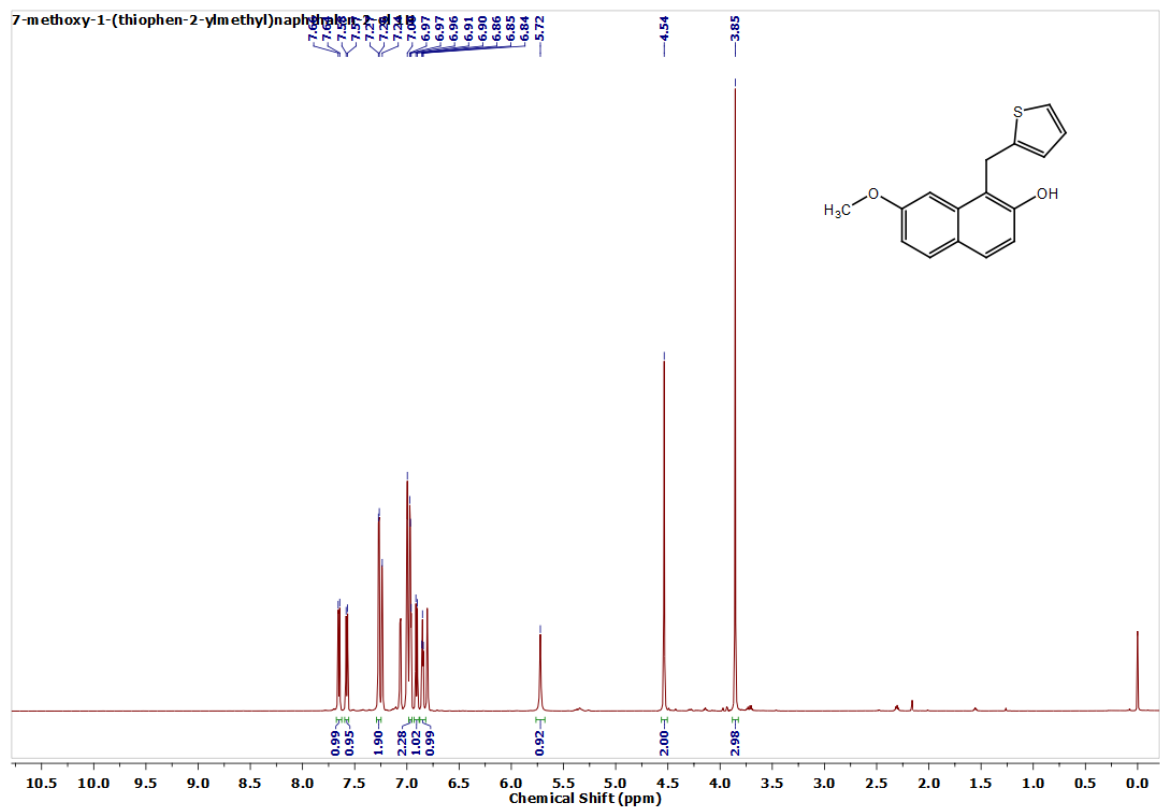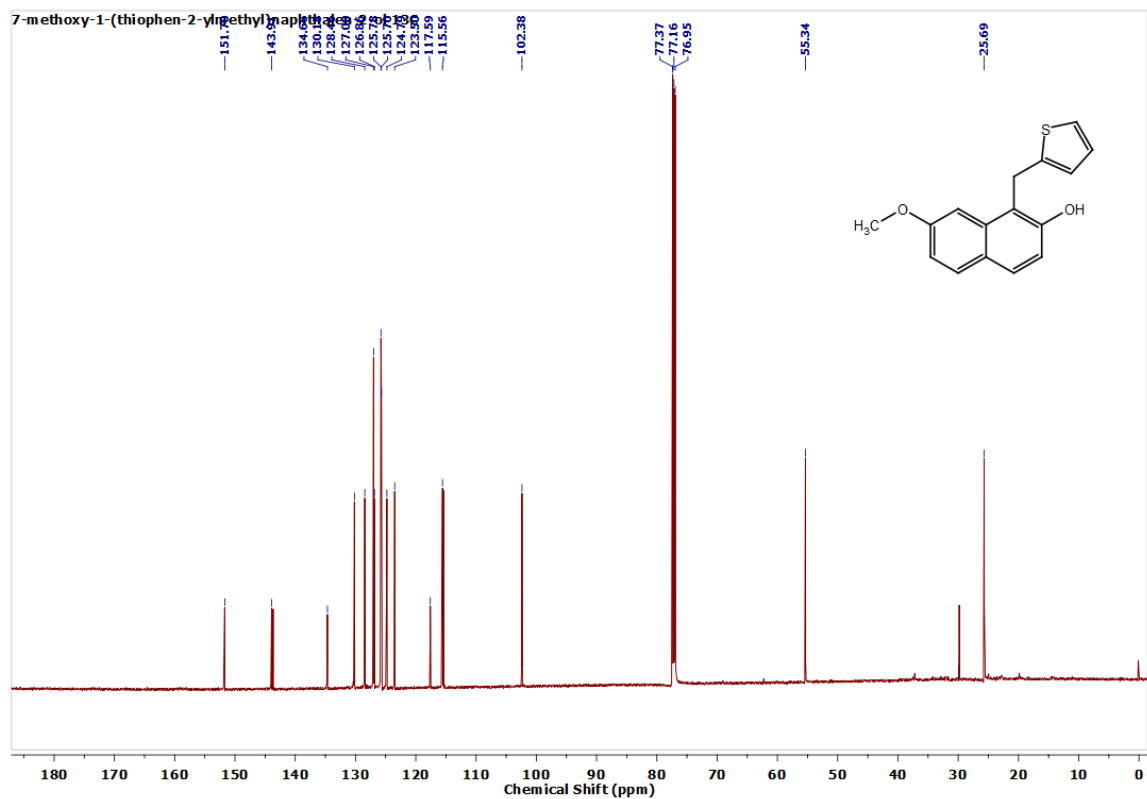



# Electronic Supplementary Information

## Compound 3t: 1-(4-chlorobenzyl)-7-methoxynaphthalen-2-ol

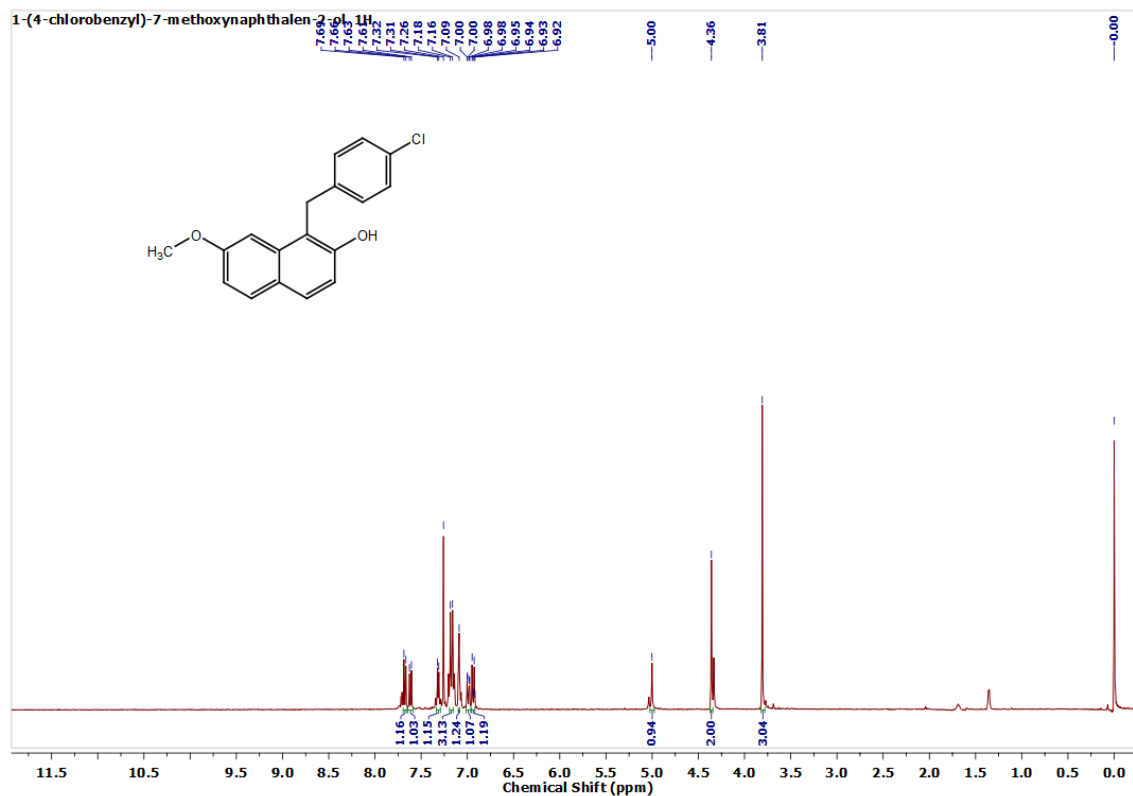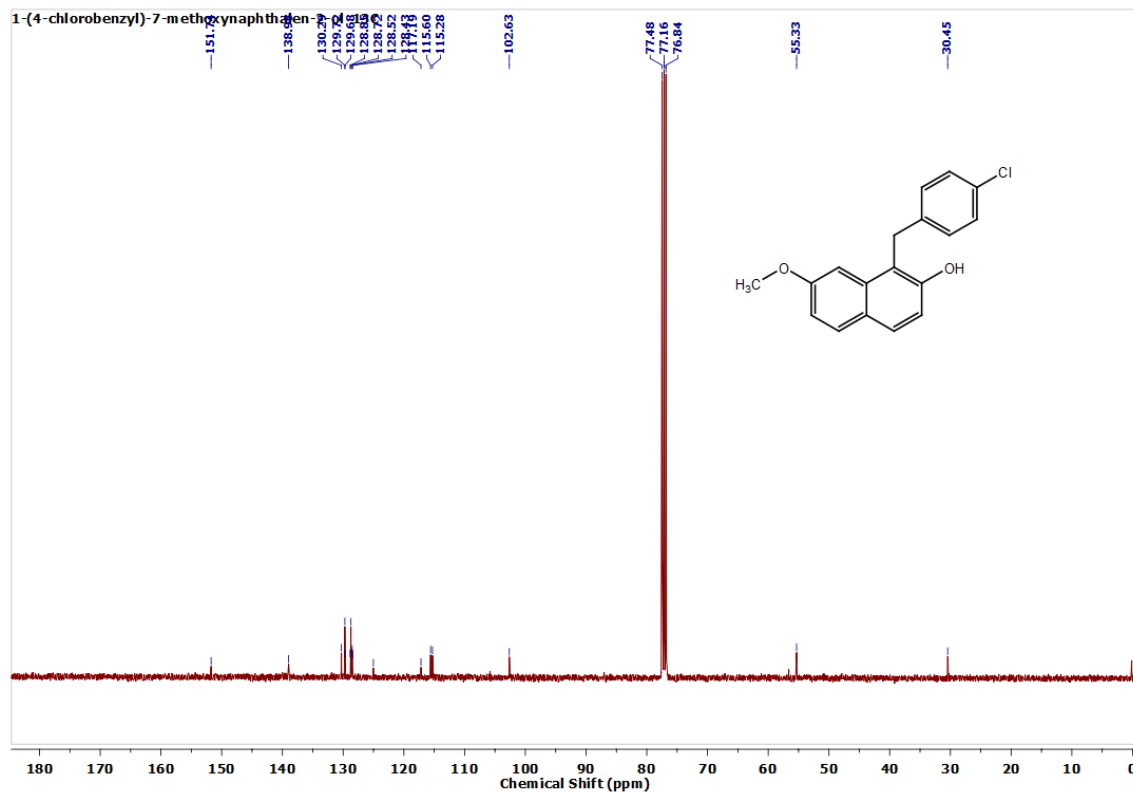



# Electronic Supplementary Information

## Compound 3u: 1-benzyl-6-bromonaphthalen-2-ol

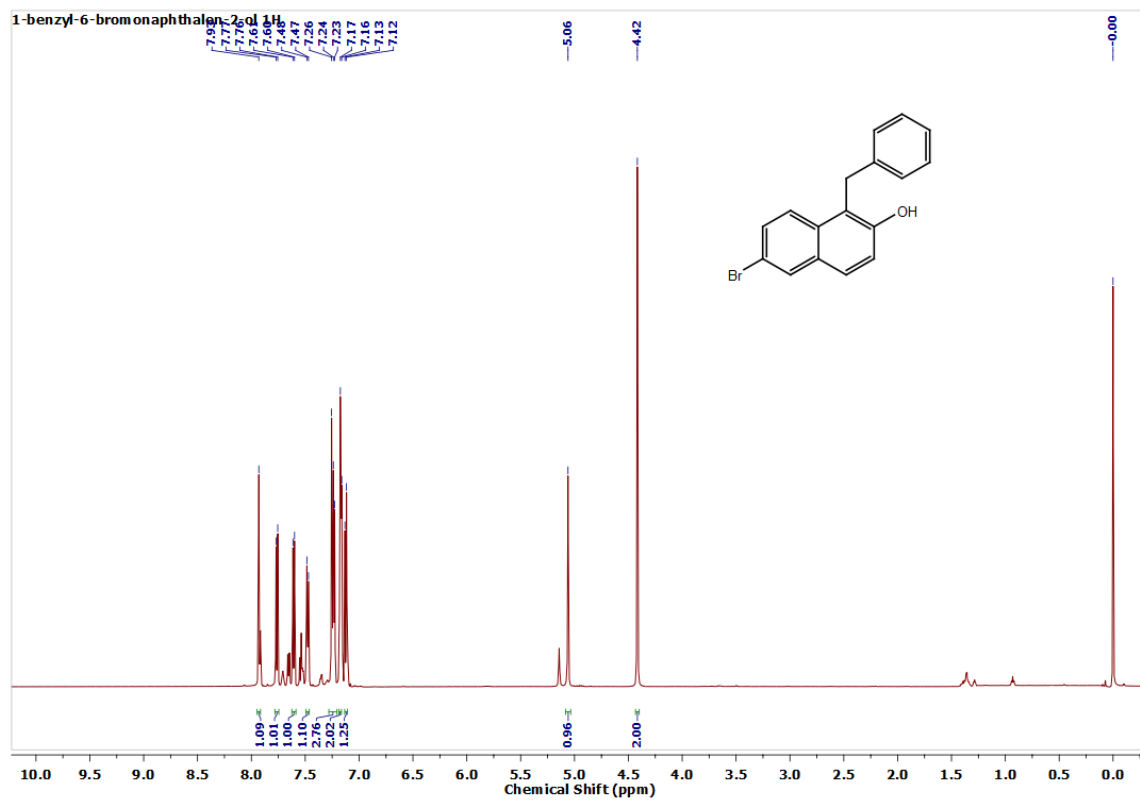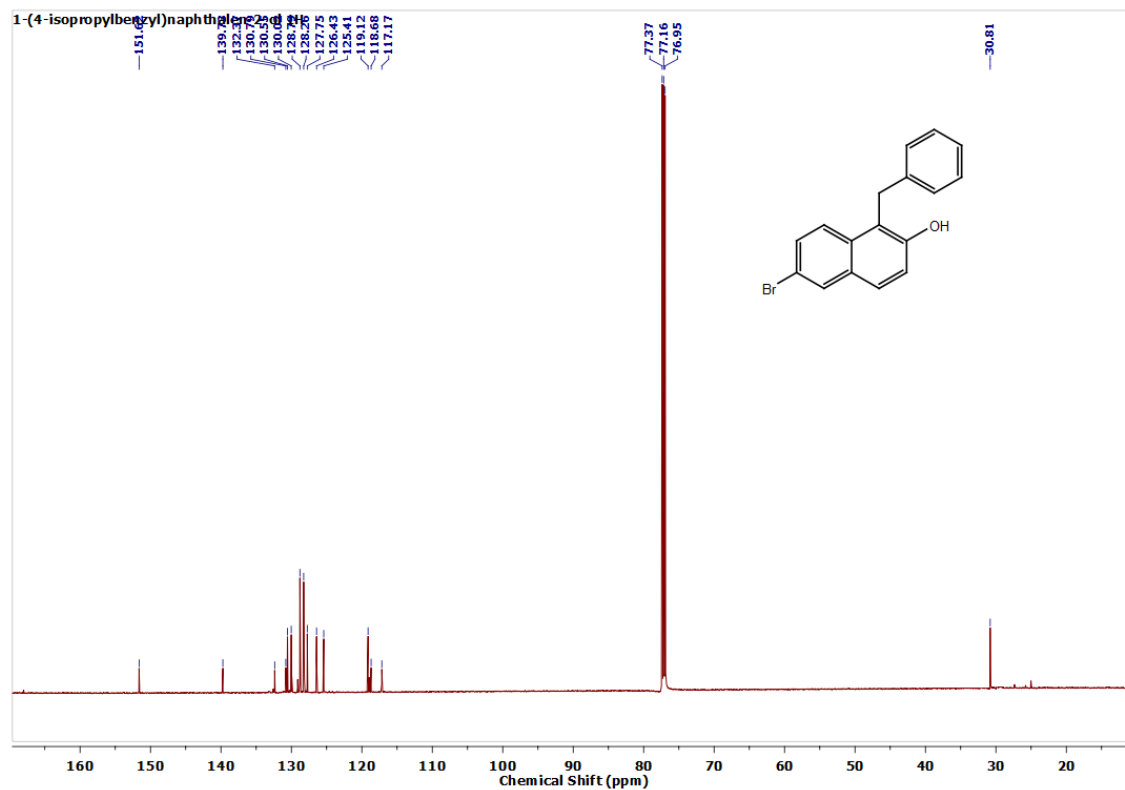

# Electronic Supplementary Information

## Compound 3v: 6-bromo-1-(4-methoxybenzyl)naphthalen-2-ol

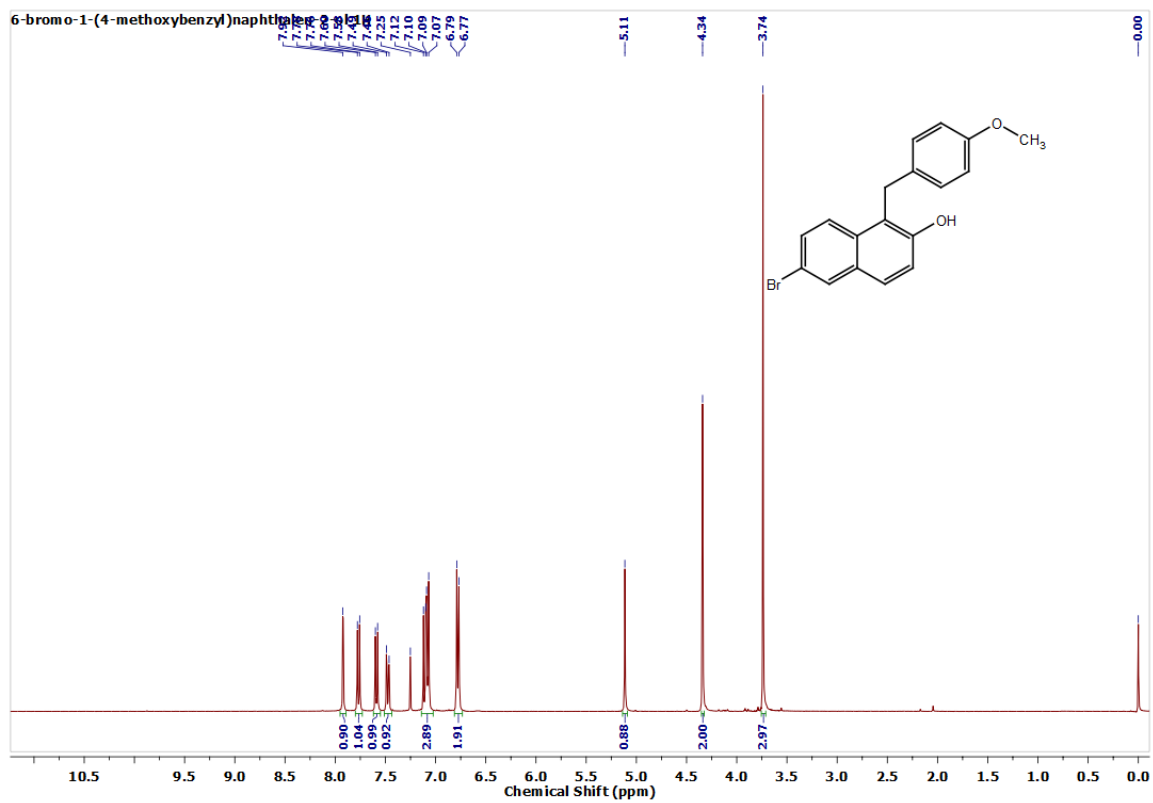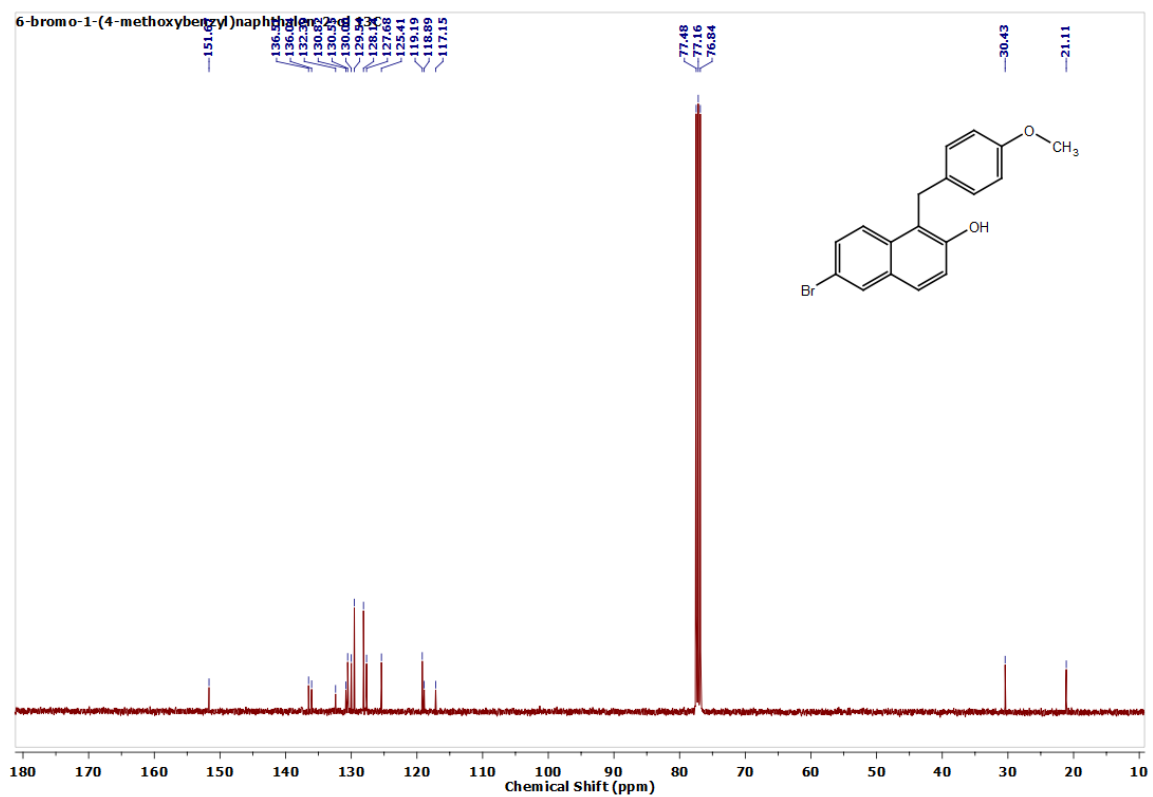

# Electronic Supplementary Information

## Compound 3w: 6-bromo-1-(4-methylbenzyl)naphthalen-2-ol

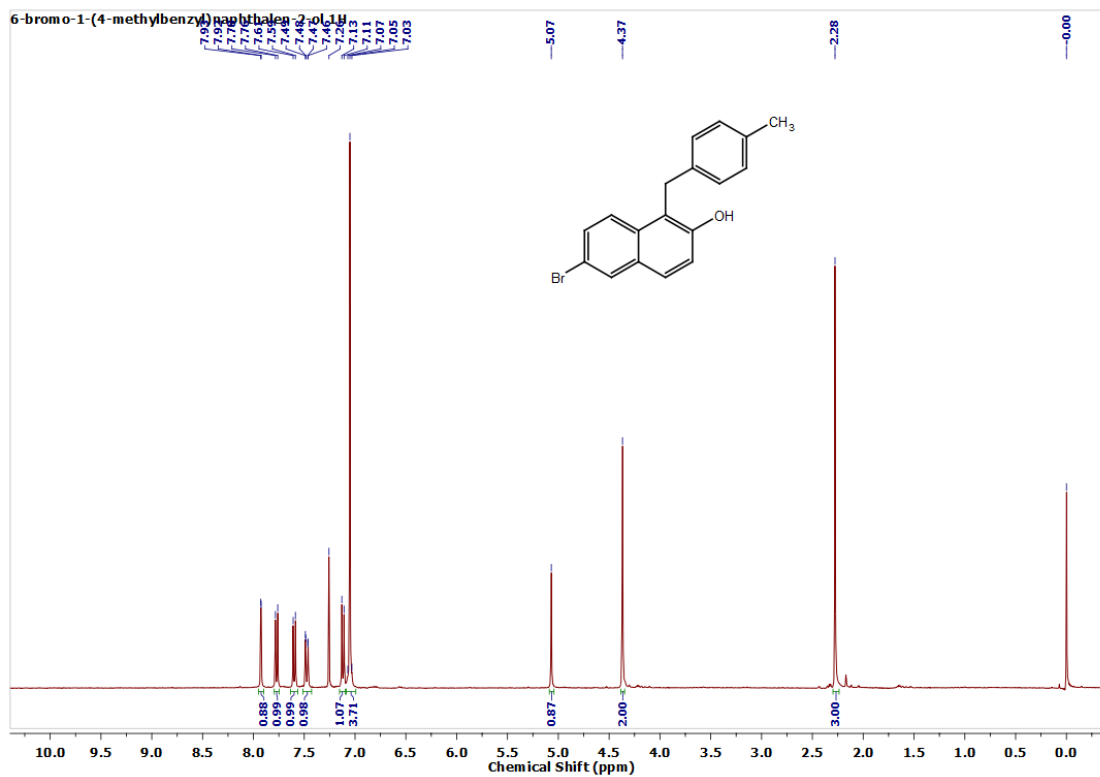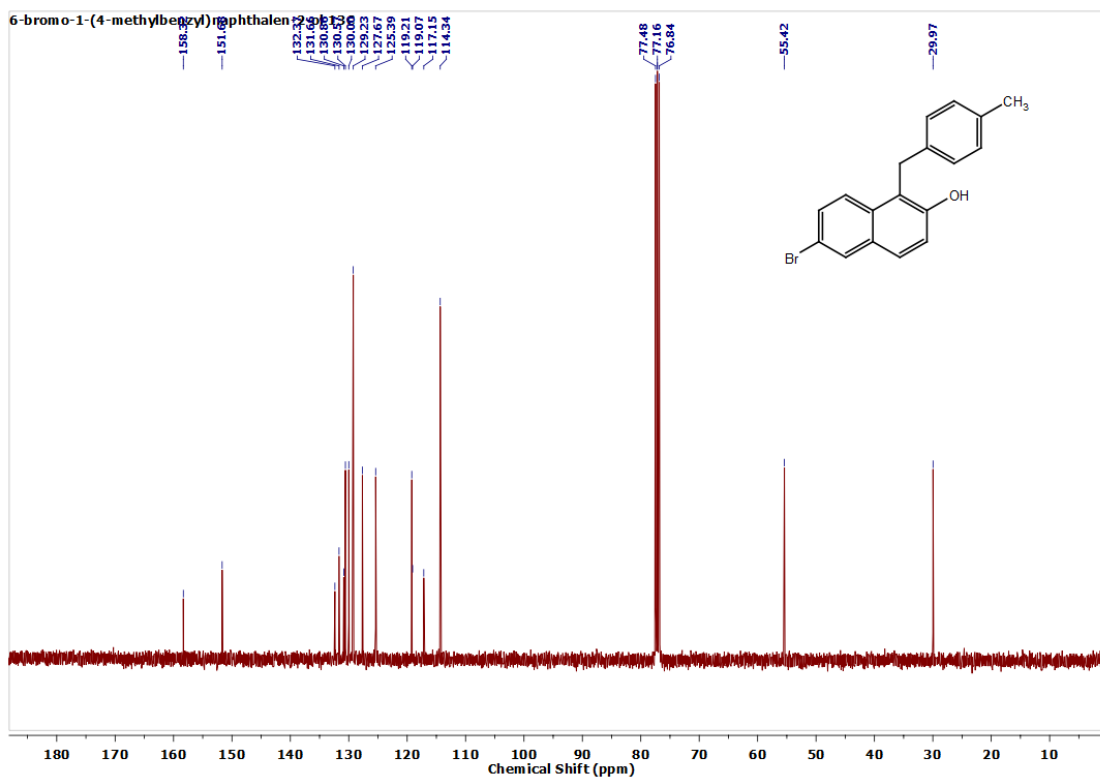

# Electronic Supplementary Information

## Compound 3x: 6-bromo-1-(thiophen-2-ylmethyl)naphthalen-2-ol

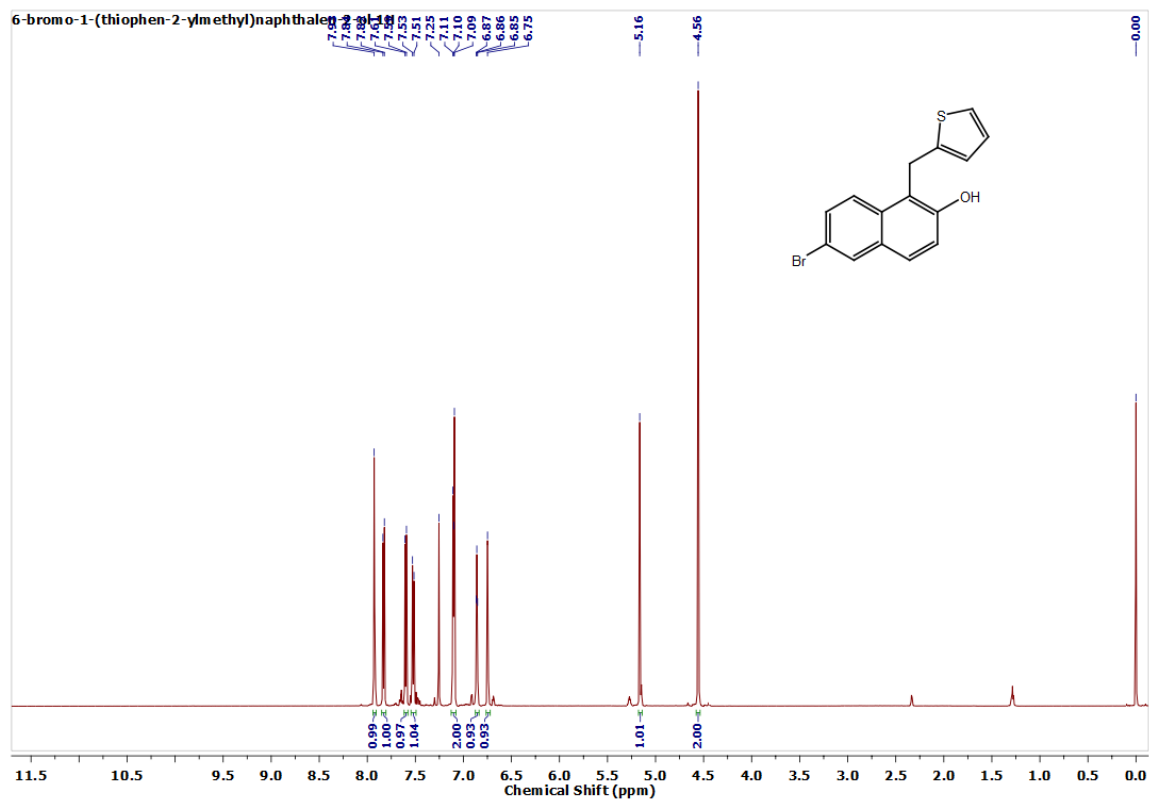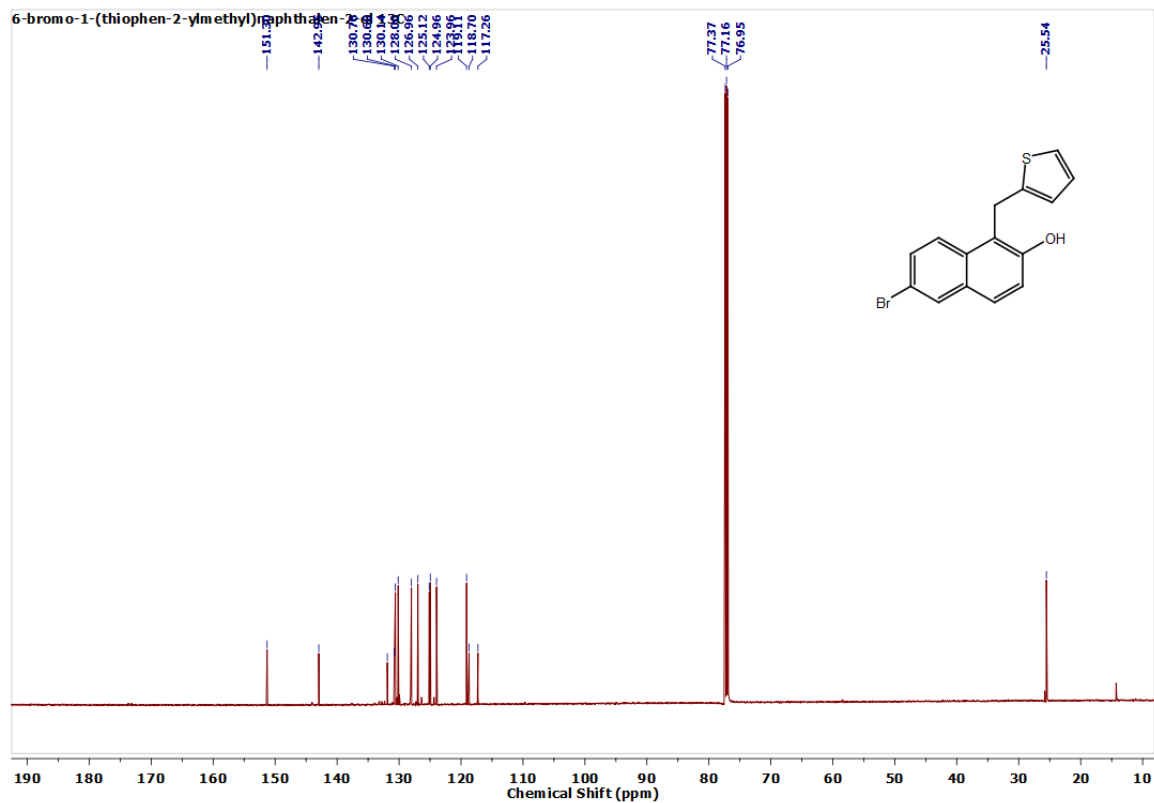

# Electronic Supplementary Information

## Compound 3y: 1-([1,1'-biphenyl]-4-ylmethyl)naphthalene-2,7-diol

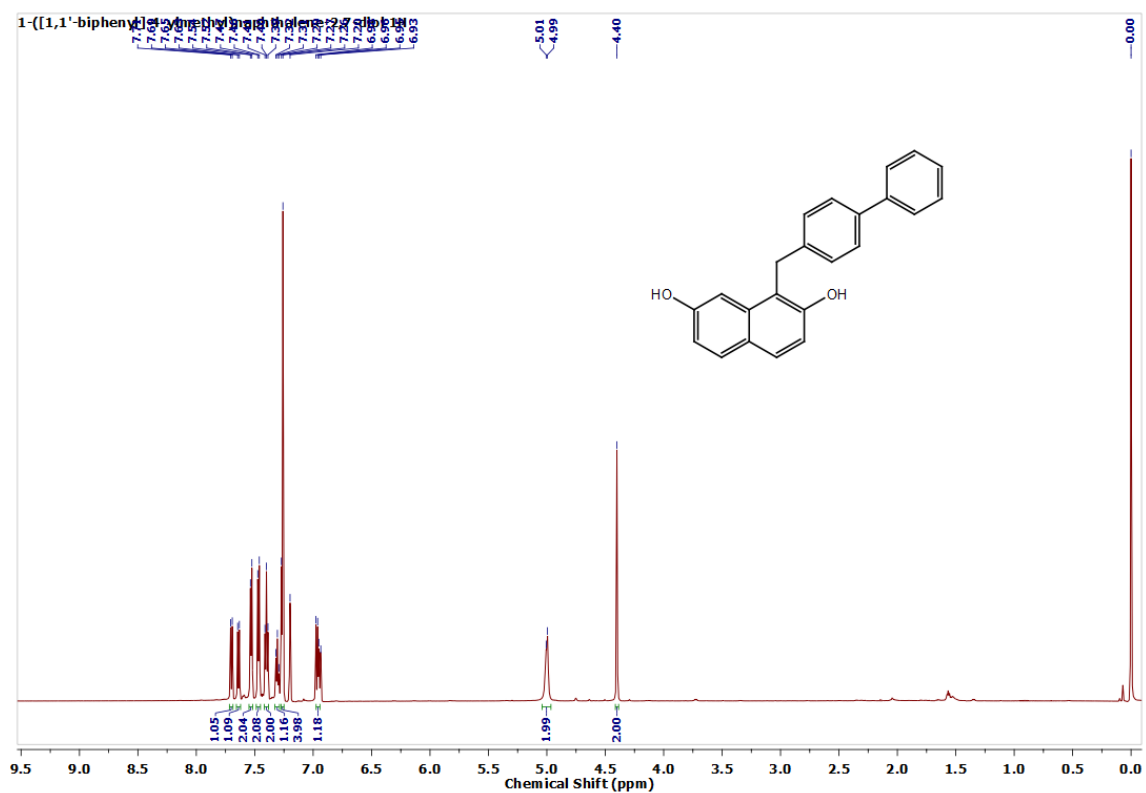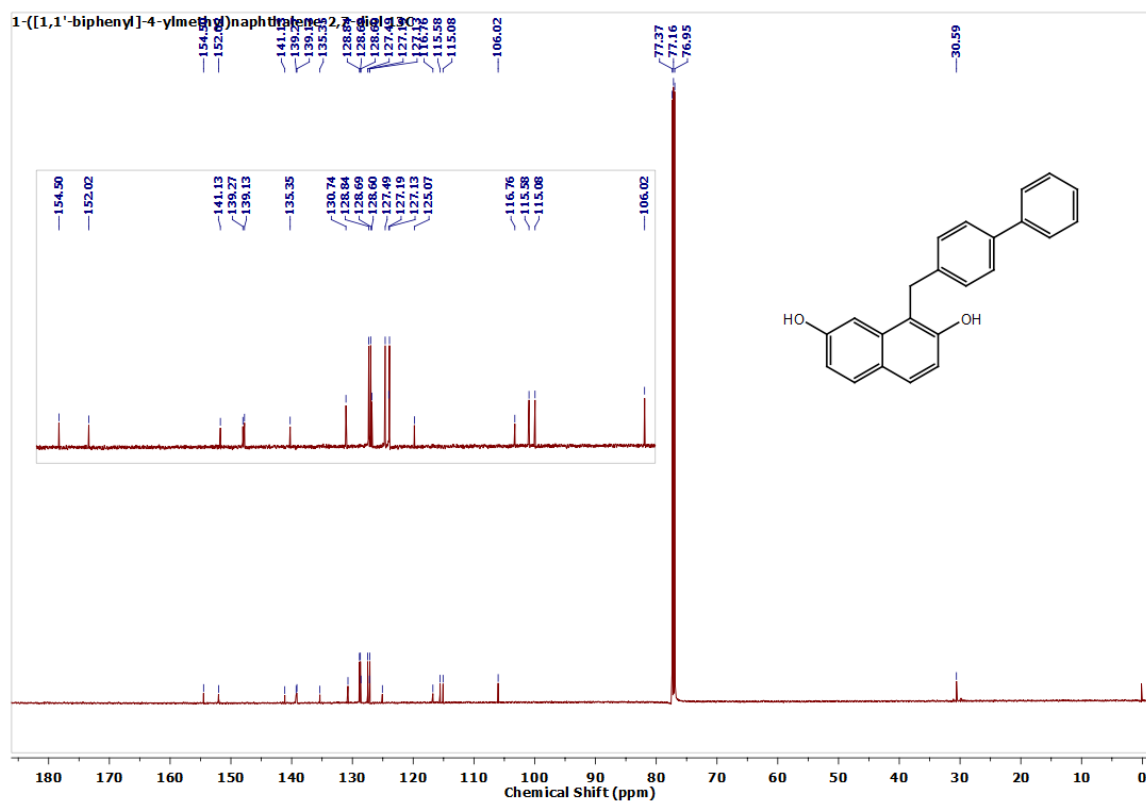

# Electronic Supplementary Information

## Compound 3z: methyl 6-hydroxy-5-(4-methoxybenzyl)-2-naphthoate

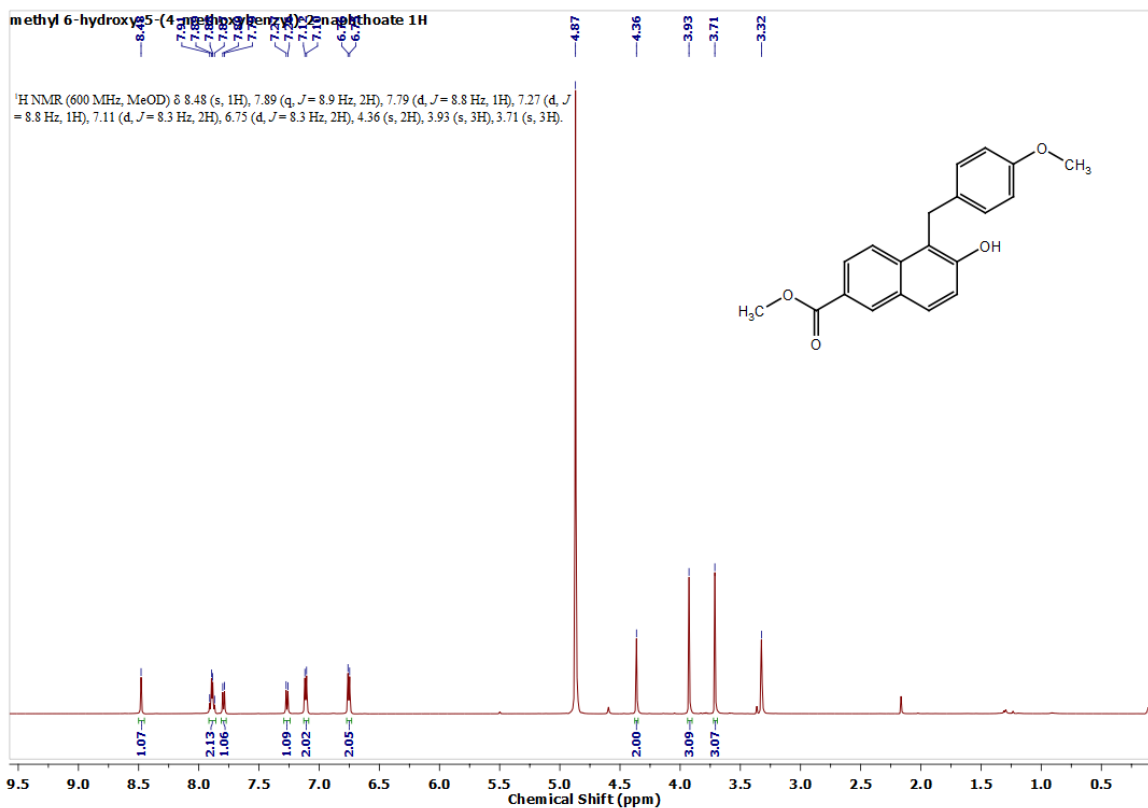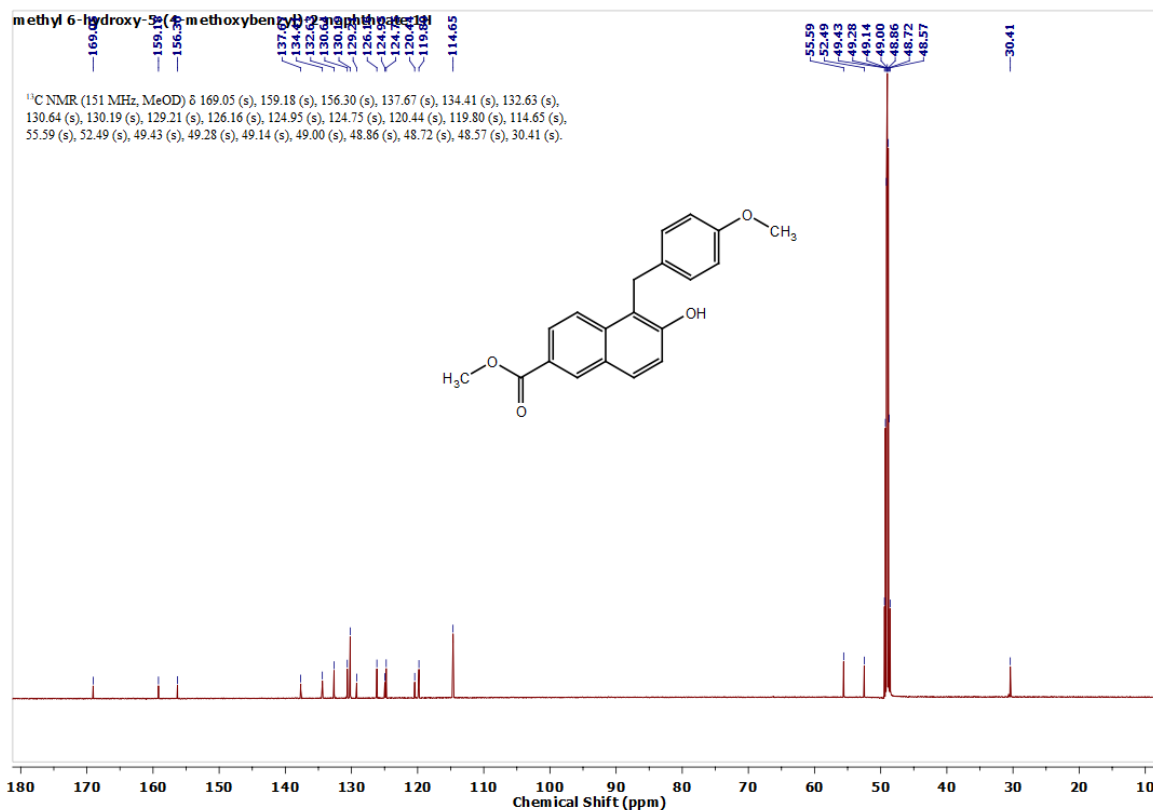

## Electronic Supplementary Information

**7 Table S2: Comparison of catalytic activities of different catalysts for C(1) benzylation of 2-naphthols with primary alcohols.<sup>[a]</sup>**

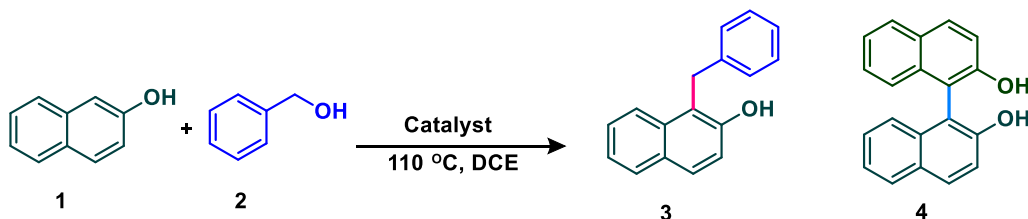

| Entry | Catalyst                                                       | Yield (%) |    |
|-------|----------------------------------------------------------------|-----------|----|
|       |                                                                | 3         | 4  |
| 1     | -                                                              | -         | -  |
| 2     | HY                                                             | -         | -  |
| 3     | Na-Y                                                           | -         | -  |
| 4     | K-Y                                                            | -         | -  |
| 5     | Fe <sub>2</sub> O <sub>3</sub>                                 | -         | -  |
| 6     | FeCl <sub>3</sub> (1 mol %)                                    | 35        | 47 |
| 7     | Fe(NO <sub>3</sub> ) <sub>3</sub> (1 mol %)                    | 31        | 38 |
| 8     | FeSO <sub>4</sub> (1 mol %)                                    | 26        | 30 |
| 9     | Fe <sub>2</sub> O <sub>3</sub> -NaY                            | 20        | -  |
| 10    | Fe <sub>2</sub> O <sub>3</sub> -HNT                            | 16        | -  |
| 11    | Fe <sub>2</sub> O <sub>3</sub> -Al <sub>2</sub> O <sub>3</sub> | trace     | -  |
| 12    | Fe <sub>2</sub> O <sub>3</sub> -SiO <sub>2</sub>               | trace     | -  |

<sup>a</sup>Reaction Conditions: 2-naphthol (1 mmol), benzyl alcohol (1 mmol), DCE (1 mL), catalyst (15 mg). Isolated yields are obtained after column chromatography.

## Electronic Supplementary Information

### 8 Computational Details

All the structures were fully optimized without any symmetry constraints at TPSSh/def2-TZVP level of theory.<sup>10,11</sup> Harmonic vibrational frequency calculations were performed at the same level of theory to understand the nature of the stationary states. All the intermediates were characterized by the presence of all real values of the Hessian matrix while the transition state was characterized by one imaginary value of the Hessian matrix. Since the transition state involved proton transfer, the imaginary frequency corresponded to the movement of the proton between the two oxygen atoms. Solvent corrections were taken into account using polarizable continuum model (PCM)<sup>11</sup> by performing single point calculations on the gas phase optimized geometries. Dichloromethane was used as the solvent. Zero point corrections were taken from gas phase calculations and solvent phase corrections were added to it. All calculations were performed using Gaussian 16 suite of program.<sup>12</sup>



## Electronic Supplementary Information

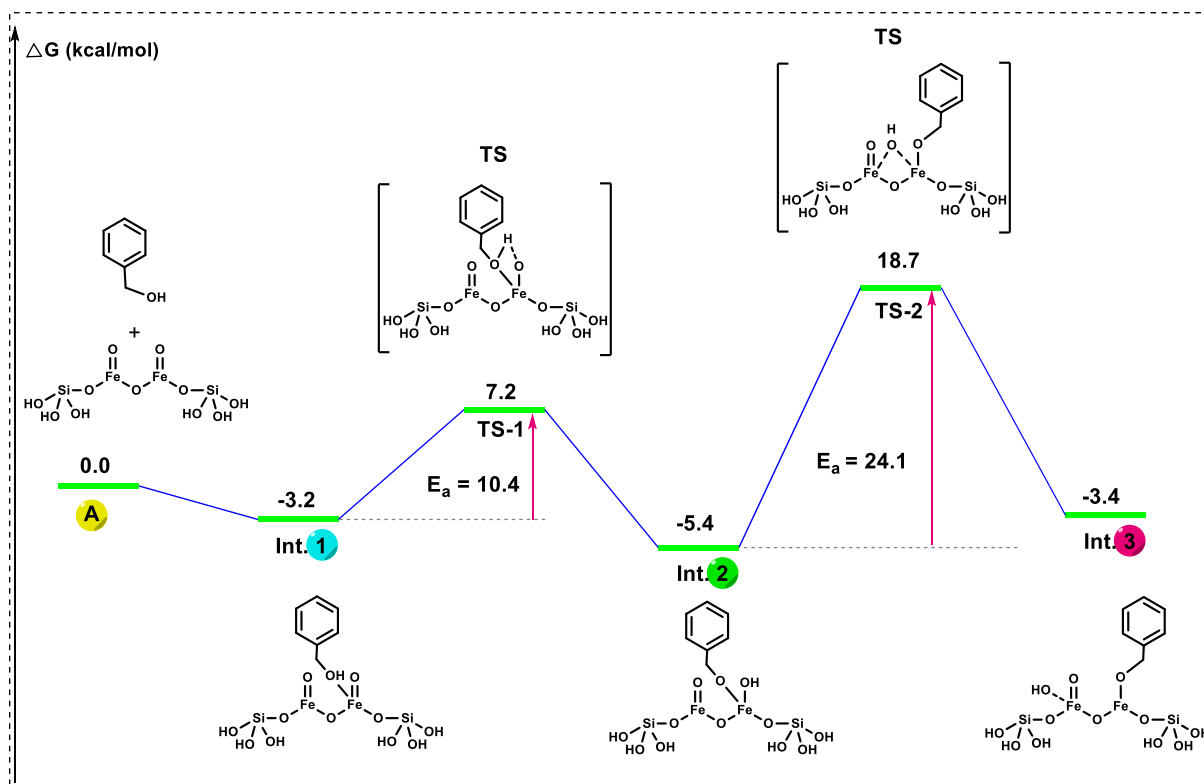

**Fig. S7** Reaction energetic (kcal/mol) for the interaction of benzyl alcohol with the supported iron oxide.

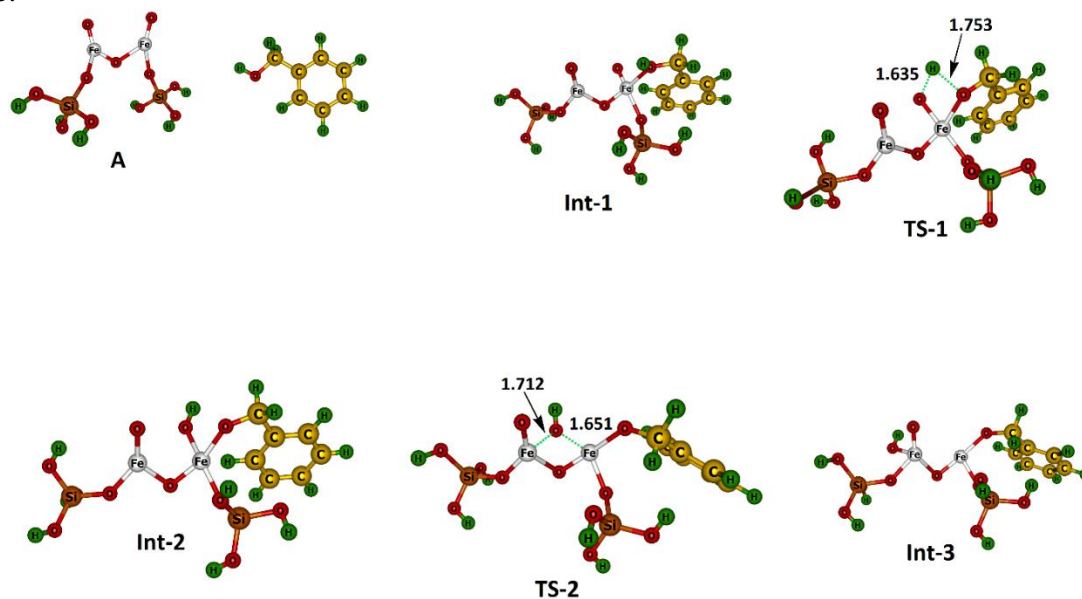

**Fig. S8** The structures of the optimized geometries. Bond lengths are in Å.

## Electronic Supplementary Information

### 8.1 Coordinates of the optimized geometries.

**A**

|    |              |              |              |
|----|--------------|--------------|--------------|
| 14 | 0.660479638  | 2.695658585  | -0.426038694 |
| 8  | -0.263675533 | 3.872880535  | 0.007788090  |
| 1  | -1.141017666 | 3.877137158  | 0.000548761  |
| 8  | 0.009055000  | 1.250779000  | 0.209550000  |
| 8  | 0.725472760  | 2.591387818  | -1.978606946 |
| 1  | 1.205983580  | 3.215388678  | -2.367514399 |
| 8  | 2.091705088  | 2.901007578  | 0.168924927  |
| 1  | 2.827183338  | 2.634953893  | -0.222493861 |
| 26 | -1.507659000 | 0.822253000  | 1.034815000  |
| 8  | -2.446933124 | 0.729278425  | 1.445919613  |
| 8  | 0.336286659  | -0.209869413 | -0.082562831 |
| 26 | -0.821667204 | -0.770365201 | -1.158230996 |
| 8  | -1.939167803 | -0.876008631 | -1.664956551 |
| 8  | 0.634087145  | -1.612903145 | -1.855281720 |
| 14 | 0.949671660  | -2.841386051 | -2.674567206 |
| 8  | 1.339016083  | -2.439438885 | -4.134452256 |
| 1  | 2.178998966  | -2.316416592 | -4.345125827 |
| 8  | -0.425805000 | -3.573629394 | -2.679581305 |
| 1  | -1.100750178 | -3.537051544 | -2.120249004 |
| 8  | 2.050990733  | -3.745420591 | -2.045995812 |
| 1  | 2.040319799  | -4.623573806 | -2.027787841 |

**Int-1**

|    |              |             |              |
|----|--------------|-------------|--------------|
| 14 | 0.999348834  | 1.940242342 | -1.741029205 |
| 8  | 0.236839130  | 3.258594225 | -1.373232043 |
| 1  | -0.581466176 | 3.162817880 | -1.659218457 |
| 8  | 0.928317000  | 0.913498000 | -0.423194000 |

### Electronic Supplementary Information

|    |              |              |              |
|----|--------------|--------------|--------------|
| 8  | 0.338332781  | 1.242949598  | -2.964716702 |
| 1  | 0.755695894  | 1.528447276  | -3.680316609 |
| 8  | 2.495732211  | 2.269595760  | -2.037401635 |
| 1  | 2.901117397  | 3.013778166  | -2.267221889 |
| 26 | 0.487149000  | -0.851979000 | -0.172460000 |
| 8  | 0.190025163  | -1.917193648 | 0.664487926  |
| 8  | -0.917676000 | -0.177873000 | 0.308664000  |
| 26 | -1.985073000 | -1.229813000 | -0.724719000 |
| 8  | -1.815969775 | -2.122801417 | -1.626294588 |
| 8  | -3.157251473 | -0.171599924 | 0.110983235  |
| 14 | -4.760394702 | 0.166297964  | 0.475815007  |
| 8  | -5.133658792 | 1.545984961  | -0.143936586 |
| 1  | -5.845459506 | 1.374873516  | -0.625216507 |
| 8  | -4.910419911 | 0.211746834  | 2.028665856  |
| 1  | -5.760299058 | 0.185199823  | 2.234231742  |
| 8  | -5.655522975 | -0.962972032 | -0.125610574 |
| 1  | -5.260070988 | -1.676504024 | -0.441730278 |
| 8  | 1.654131000  | -1.898070000 | -1.048313000 |
| 1  | 1.299102127  | -1.805747497 | -1.989167766 |
| 6  | 4.671428000  | 0.431046000  | 2.077421000  |
| 6  | 5.517641000  | -0.257982000 | 1.203879000  |
| 6  | 4.977934000  | -1.096274000 | 0.224199000  |
| 6  | 3.589290000  | -1.251751000 | 0.119567000  |
| 6  | 2.734374000  | -0.566278000 | 1.000385000  |
| 6  | 3.284682000  | 0.273411000  | 1.976500000  |
| 1  | 5.089346000  | 1.083472000  | 2.840329000  |
| 1  | 6.596291000  | -0.144545000 | 1.286506000  |
| 1  | 5.638946000  | -1.627601000 | -0.456950000 |

## Electronic Supplementary Information

|   |             |              |              |
|---|-------------|--------------|--------------|
| 1 | 1.607285000 | -0.721074000 | 0.998782000  |
| 1 | 2.631313000 | 0.811980000  | 2.662406000  |
| 6 | 3.012076000 | -2.144553000 | -0.964234000 |
| 1 | 3.474381000 | -1.930817000 | -1.953439000 |
| 1 | 3.170528000 | -3.219644000 | -0.726586000 |

### TS-1

|    |              |              |              |
|----|--------------|--------------|--------------|
| 14 | 0.440551863  | 2.497315364  | -0.651821082 |
| 8  | -0.645318845 | 2.834687330  | 0.427421966  |
| 1  | -1.499172433 | 2.844357225  | 0.252625678  |
| 8  | 0.926139000  | 0.913538000  | -0.423959000 |
| 8  | -0.140717106 | 2.649159426  | -2.086493794 |
| 1  | -0.386237572 | 3.377653963  | -2.507536499 |
| 8  | 1.675075710  | 3.431777587  | -0.457021332 |
| 1  | 1.767781232  | 3.726140768  | -1.279129103 |
| 26 | 0.481638000  | -0.848406000 | -0.155017000 |
| 8  | 0.160070000  | -2.408401000 | 0.688898000  |
| 8  | -0.923231000 | -0.167421000 | 0.316321000  |
| 26 | -1.989725000 | -1.230146000 | -0.707021000 |
| 8  | -1.670210251 | -2.025245835 | -1.542614415 |
| 8  | -3.347440000 | -0.325632000 | 0.021214000  |
| 14 | -4.994094284 | -0.408115376 | 0.337232610  |
| 8  | -5.764277088 | -0.411448032 | -1.018569703 |
| 1  | -5.609154077 | -0.647717854 | -1.847455883 |
| 8  | -5.397233649 | 0.833072917  | 1.192957095  |
| 1  | -6.215487707 | 1.067816128  | 1.392848275  |
| 8  | -5.278166278 | -1.723196274 | 1.126883264  |
| 1  | -6.018425042 | -2.133729564 | 0.904293092  |
| 8  | 1.648460000  | -1.905358000 | -1.018079000 |

## Electronic Supplementary Information

|   |             |              |              |
|---|-------------|--------------|--------------|
| 1 | 1.025323000 | -3.377804000 | -0.298790000 |
| 6 | 4.665448000 | 0.455965000  | 2.083277000  |
| 6 | 5.511663000 | -0.242862000 | 1.217543000  |
| 6 | 4.971927000 | -1.091960000 | 0.247245000  |
| 6 | 3.583260000 | -1.248332000 | 0.144212000  |
| 6 | 2.728340000 | -0.552861000 | 1.017144000  |
| 6 | 3.278687000 | 0.297495000  | 1.983961000  |
| 1 | 5.083381000 | 1.116938000  | 2.838797000  |
| 1 | 6.590314000 | -0.128742000 | 1.299116000  |
| 1 | 5.632901000 | -1.631133000 | -0.427744000 |
| 1 | 1.601200000 | -0.707354000 | 1.016862000  |
| 1 | 2.625368000 | 0.843730000  | 2.663806000  |
| 6 | 3.005897000 | -2.153017000 | -0.929600000 |
| 1 | 3.469574000 | -1.951751000 | -1.920772000 |
| 1 | 3.162384000 | -3.225451000 | -0.679013000 |

### Int-2

|    |              |              |              |
|----|--------------|--------------|--------------|
| 14 | 0.705735205  | 2.124167367  | -1.554863617 |
| 8  | -0.286148170 | 3.177207046  | -0.953180735 |
| 1  | -1.083663772 | 2.955771038  | -1.227989522 |
| 8  | 0.928317000  | 0.913498000  | -0.423194000 |
| 8  | 0.126783429  | 1.501613417  | -2.857864731 |
| 1  | 0.431627290  | 1.976882711  | -3.527919533 |
| 8  | 2.081674506  | 2.805336488  | -1.834637043 |
| 1  | 2.311085330  | 3.645035013  | -1.949697958 |
| 26 | 0.487149000  | -0.851979000 | -0.172460000 |
| 8  | 0.313486032  | -2.209533410 | 0.736307603  |
| 8  | -0.917676000 | -0.177873000 | 0.308664000  |

## Electronic Supplementary Information

|             |              |              |              |
|-------------|--------------|--------------|--------------|
| 26          | -1.985073000 | -1.229813000 | -0.724719000 |
| 8           | -1.633542995 | -2.155549929 | -1.346844967 |
| 8           | -3.340458000 | -0.330420000 | 0.014361000  |
| 14          | -4.984997595 | -0.385003907 | 0.345805618  |
| 8           | -5.647895336 | 0.915090709  | -0.199423602 |
| 1           | -6.293803768 | 0.622226476  | -0.713818960 |
| 8           | -5.170183154 | -0.479660748 | 1.892629885  |
| 1           | -5.995902258 | -0.709408472 | 2.067731532  |
| 8           | -5.591425344 | -1.642349585 | -0.353869529 |
| 1           | -5.039612292 | -2.226294260 | -0.700211581 |
| 8           | 1.654131000  | -1.898070000 | -1.048313000 |
| 1           | -0.245382529 | -3.132485368 | 0.635537458  |
| 6           | 4.671428000  | 0.431046000  | 2.077421000  |
| 6           | 5.517641000  | -0.257982000 | 1.203879000  |
| 6           | 4.977934000  | -1.096274000 | 0.224199000  |
| 6           | 3.589290000  | -1.251751000 | 0.119567000  |
| 6           | 2.734374000  | -0.566278000 | 1.000385000  |
| 6           | 3.284682000  | 0.273411000  | 1.976500000  |
| 1           | 5.089346000  | 1.083472000  | 2.840329000  |
| 1           | 6.596291000  | -0.144545000 | 1.286506000  |
| 1           | 5.638946000  | -1.627601000 | -0.456950000 |
| 1           | 1.607285000  | -0.721074000 | 0.998782000  |
| 1           | 2.631313000  | 0.811980000  | 2.662406000  |
| 6           | 3.012076000  | -2.144553000 | -0.964234000 |
| 1           | 3.474381000  | -1.930817000 | -1.953439000 |
| 1           | 3.170528000  | -3.219644000 | -0.726586000 |
| <b>TS-2</b> |              |              |              |
| 14          | 0.818680967  | 1.657970755  | -1.506527436 |

### Electronic Supplementary Information

|    |              |              |              |
|----|--------------|--------------|--------------|
| 8  | -0.173202408 | 2.711010434  | -0.904844554 |
| 1  | -0.970718010 | 2.489574426  | -1.179653341 |
| 8  | 1.041262762  | 0.447301388  | -0.374857819 |
| 8  | 0.239729191  | 1.035416805  | -2.809528550 |
| 1  | 0.544573052  | 1.510686099  | -3.479583352 |
| 8  | 2.194620268  | 2.339139876  | -1.786300862 |
| 1  | 2.424031091  | 3.178838401  | -1.901361777 |
| 26 | 0.600094762  | -1.318175612 | -0.124123819 |
| 8  | -0.579058381 | -2.441979780 | 0.161737363  |
| 8  | -0.804730238 | -0.644069612 | 0.357000181  |
| 26 | -1.872127238 | -1.696009612 | -0.676382819 |
| 8  | -1.520597233 | -2.621746541 | -1.298508786 |
| 8  | -3.426819013 | -1.129093637 | -0.002769225 |
| 14 | -4.879706648 | -1.967851331 | 0.051530552  |
| 8  | -6.009905929 | -1.045160021 | -0.494587254 |
| 1  | -6.383159794 | -1.521823449 | -1.127867030 |
| 8  | -5.166689862 | -2.355137256 | 1.535972929  |
| 1  | -5.802445120 | -2.955678980 | 1.556504194  |
| 8  | -4.746787548 | -3.249541477 | -0.830411036 |
| 1  | -3.951789627 | -3.464935614 | -1.125411911 |
| 8  | 1.767076762  | -2.364266612 | -0.999976819 |
| 1  | -0.409814285 | -3.530080607 | 0.105943026  |
| 6  | 5.632296516  | -1.431549671 | 2.394975965  |
| 6  | 6.199628338  | -2.016618910 | 1.259308654  |
| 6  | 5.384788805  | -2.403401834 | 0.191495219  |
| 6  | 3.998538178  | -2.210734522 | 0.259624626  |
| 6  | 3.422522890  | -1.629100535 | 1.402648355  |
| 6  | 4.247635011  | -1.242363370 | 2.465823485  |

### Electronic Supplementary Information

|   |             |              |              |
|---|-------------|--------------|--------------|
| 1 | 6.264459086 | -1.130176954 | 3.226774455  |
| 1 | 7.274667220 | -2.173501385 | 1.205827015  |
| 1 | 5.829811208 | -2.854322429 | -0.692719056 |
| 1 | 2.297043865 | -1.522889294 | 1.530359437  |
| 1 | 3.812214958 | -0.787719292 | 3.355274326  |
| 6 | 3.125021762 | -2.610749612 | -0.915897819 |
| 1 | 3.587326762 | -2.397013612 | -1.905102819 |
| 1 | 3.283473762 | -3.685840612 | -0.678249819 |

#### Int-3

|    |              |              |              |
|----|--------------|--------------|--------------|
| 14 | 0.818680967  | 1.657970755  | -1.506527436 |
| 8  | -0.173202408 | 2.711010434  | -0.904844554 |
| 1  | -0.970718010 | 2.489574426  | -1.179653341 |
| 8  | 1.041262762  | 0.447301388  | -0.374857819 |
| 8  | 0.239729191  | 1.035416805  | -2.809528550 |
| 1  | 0.544573052  | 1.510686099  | -3.479583352 |
| 8  | 2.194620268  | 2.339139876  | -1.786300862 |
| 1  | 2.424031091  | 3.178838401  | -1.901361777 |
| 26 | 0.600094762  | -1.318175612 | -0.124123819 |
| 8  | -2.360004039 | -2.491526138 | 0.286454258  |
| 8  | -0.804730238 | -0.644069612 | 0.357000181  |
| 26 | -1.872127238 | -1.696009612 | -0.676382819 |
| 8  | -1.520597233 | -2.621746541 | -1.298508786 |
| 8  | -3.426819013 | -1.129093637 | -0.002769225 |
| 14 | -4.879706648 | -1.967851331 | 0.051530552  |
| 8  | -6.009905929 | -1.045160021 | -0.494587254 |
| 1  | -6.383159794 | -1.521823449 | -1.127867030 |
| 8  | -5.166689862 | -2.355137256 | 1.535972929  |
| 1  | -5.802445120 | -2.955678980 | 1.556504194  |



### Electronic Supplementary Information

|   |              |              |              |
|---|--------------|--------------|--------------|
| 8 | -4.746787548 | -3.249541477 | -0.830411036 |
| 1 | -3.951789627 | -3.464935614 | -1.125411911 |
| 8 | 1.767076762  | -2.364266612 | -0.999976819 |
| 1 | -2.393731107 | -3.414939212 | 0.377997369  |
| 6 | 5.632296516  | -1.431549671 | 2.394975965  |
| 6 | 6.199628338  | -2.016618910 | 1.259308654  |
| 6 | 5.384788805  | -2.403401834 | 0.191495219  |
| 6 | 3.998538178  | -2.210734522 | 0.259624626  |
| 6 | 3.422522890  | -1.629100535 | 1.402648355  |
| 6 | 4.247635011  | -1.242363370 | 2.465823485  |
| 1 | 6.264459086  | -1.130176954 | 3.226774455  |
| 1 | 7.274667220  | -2.173501385 | 1.205827015  |
| 1 | 5.829811208  | -2.854322429 | -0.692719056 |
| 1 | 2.297043865  | -1.522889294 | 1.530359437  |
| 1 | 3.812214958  | -0.787719292 | 3.355274326  |
| 6 | 3.125021762  | -2.610749612 | -0.915897819 |
| 1 | 3.587326762  | -2.397013612 | -1.905102819 |
| 1 | 3.283473762  | -3.685840612 | -0.678249819 |

9. Catalytic Recyclability Study

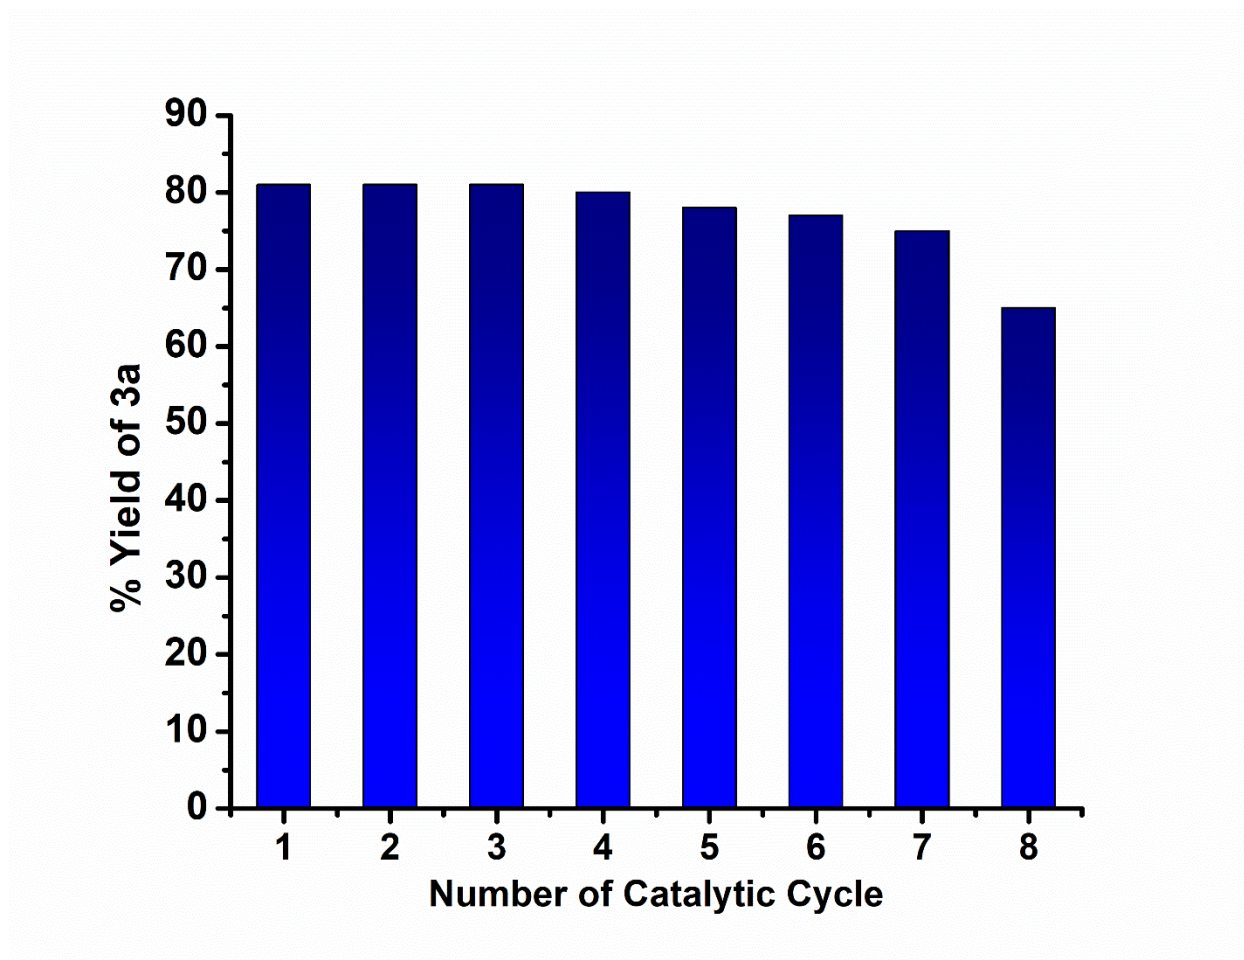

Fig. S9 Showing % yield of **3a** in each consecutive run of Fe<sub>2</sub>O<sub>3</sub>-KY.

## Electronic Supplementary Information

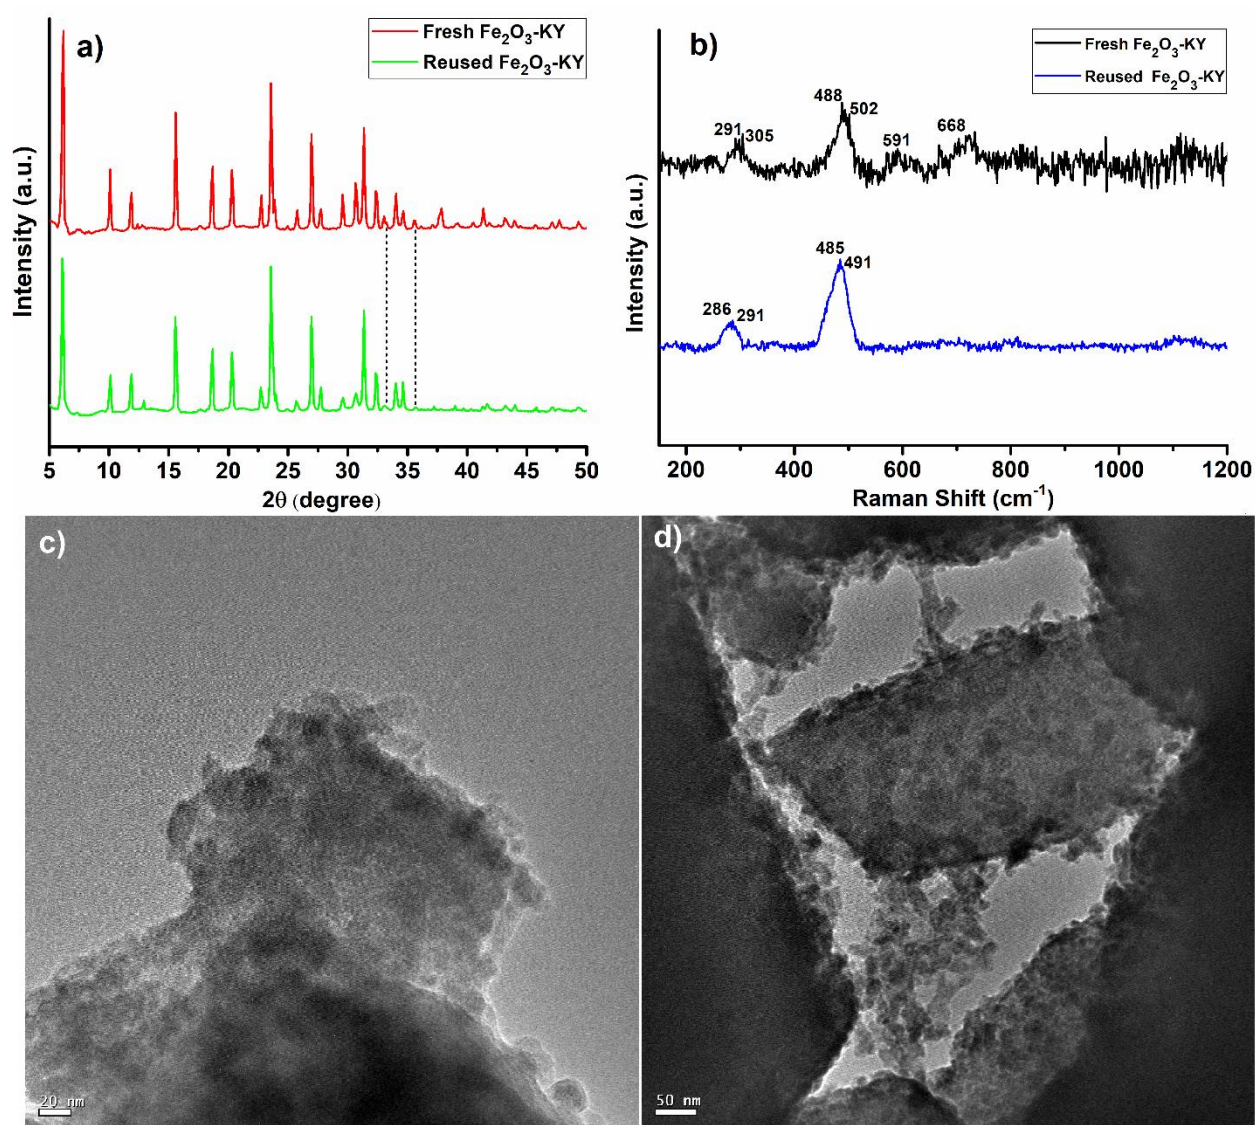

**Fig. S10** a) XRD pattern of fresh (red line) and reused (green line) catalyst after 8<sup>th</sup> cycle, b) Raman spectra of fresh (black line) and reused (blue line) catalyst after 8<sup>th</sup> cycle, c-d) TEM images of reused Fe<sub>2</sub>O<sub>3</sub>-KY catalyst.

## Electronic Supplementary Information

### 10. References

- 1 M. Y. Choo, J. C. Juan, L. E. Oi, T. C. Ling, E. P. Ng, A. R. Noorsaadah, G. Centi and K. T. Lee, *Catal. Sci. Technol.*, 2019, **9**, 772-782.
- 2 a) M. Qayoom, K. A. Shah, A. H. Pandit, A. Firdous and G. N. Dar, *J. Electroceramics.*, 2020, **45**, 7-14; b) F. Wang, X. F. Qin, Y. F. Meng, Z. L. Guo, L. X. Yang, Y. F. Ming, *Mater. Sci. Semicond. Process.*, 2013, **16**, 802-806.
- 3 M. C. Biesinger, B. P. Payne, A. P. Grosvenor, L. W. M. Lau, A. R. Gerson and R. S. C. Smart, *Appl. Surf. Sci.*, 2011, **257**, 2717-2730.
- 4 S. Biswas, M. J. Baruah, G. Gogoi, N. Hoque, S. Lee, Y. B. Park, L. Saikia and K. K. Bania, *Microporous and Mesoporous Mater.*, 2022, **336**, 111893.
- 5 H. Nohira, W. Tsai, W. Besling, E. Young, J. Pétry, T. Conard, W. Vandervorst, S. De Gendt, M. Heyns, J. Maes and M. Tuominen, *J. Non-Cryst. Solids*, 2002, **303**, 83-87.
- 6 SAINT Plus (v 6.14); Bruker AXS Inc.: Madison, WI, 2008.
- 7 C. F. Macrae, I. Sovago, S. J. Cottrell, P. T. Galek, P. McCabe, E. Pidcock, M. Platings, G. P. Shields, J. S. Stevens, M. Towler and P. A. Wood, *J. Appl. Cryst.*, 2020, **53**, 226-235.
- 8 N. K. Paul, L. Dietrich and A. Jha, *Synth. Commun.*, 2007, **37**, 877-888.
- 9 P. Dutta, C. D. Pegu, M. L. Deb and P. K. Baruah, *Tetrahedron Lett.*, 2015, **56**, 4115-4118.
- 10 J. M. Tao, J. P. Perdew, V. N. Staroverov and G. E. Scuseria, *Phys. Rev. Lett.*, 2003, **91**, 146401.
- 11 V. N. Staroverov, G. E. Scuseria, J. Tao and J. P. Perdew, *J. Chem. Phys.*, 2003, **119**, 12129.
- 12 M. J. Frisch, G. W. Trucks, H. B. Schlegel, G. E. Scuseria, M. A. Robb, J. R. Cheeseman, G. Scalmani, V. Barone, G. A. Petersson, H. Nakatsuji, X. Li, M. Caricato, A. V. Marenich, J. Bloino, B. G. Janesko, R. Gomperts, B. Mennucci, H. P. Hratchian, J. V. Ortiz, A. F. Izmaylov, J. L. Sonnenberg, D. Williams-Young, F. Ding, F. Lipparini, F. Egidi, J. Goings, B. Peng, A. Petrone, T. Henderson, D. Ranasinghe, V. G. Zakrzewski, J. Gao, N. Rega, G. Zheng, W. Liang, M. Hada, M. Ehara, K. Toyota, R. Fukuda, J. Hasegawa, M. Ishida, T. Nakajima, Y. Honda, O. Kitao, H. Nakai, T. Vreven, K. Throssell, J. A. Montgomery, Jr., J. E. Peralta, F. Ogliaro, M. J. Bearpark, J. J. Heyd, E. N. Brothers, K. N. Kudin, V. N. Staroverov, T. A. Keith, R. Kobayashi, J. Normand, K. Raghavachari, A. P. Rendell, J. C. Burant, S. S. Iyengar, J. Tomasi, M. Cossi, J. M. Millam, M. Klene, C. Adamo, R. Cammi, J. W. Ochterski, R. L. Martin, K. Morokuma, O. Farkas, J. B. Foresman and D. J. Fox, Gaussian, Inc., Wallingford CT, 2016.
